# Supplementary material for: Gene fusions, micro-exons and splice variants define stress signaling by AP2/ERF and WRKY transcription factors in the sesame pan-genome
Source: Front Plant Sci. 2022 Dec 22;13:1076229. doi: 10.3389/fpls.2022.1076229 (PMC9817154; doi:10.3389/fpls.2022.1076229)
Supplement: Supplementary file 4 [file Table_1.xlsx]

## Sheet: AP2_class
SI-1A Protein parametrs and genomic location of AP2/ERF genes in sesame pan-genome									SI-1B Sub-family wise classification of individual AP2/ERF genes and intron number				SI-1C Intron number distribution among AP2/ERF subfamilies																				SI-1D Exon size and count as per genome and sub-family of AP2/ERF genes
AP2/ERF_gene	Pfam id	Domain	introns	Length	Mol. Wt	pI	location		Gene	Class	Intron		Class/Introns	zero	one	two	three	four	five	six	seven	eight	nine	ten	eleven	twelve	fourteen	sixteen	twenty	thirty six	TOTAL		Genome	Exon_size	Count
Swetha_00824	PF00847	AP2 domain	4	500	55678	8.32	Chr1		Mishuozhima 04837	DREB A-6	0		AP2	0	0	1	1	3	23	23	36	24	4	4	1	6	0	1	1	0	128		Baizhima	1-50bp	39
Swetha_01481	PF00847	AP2 domain	1	173	19230.6	9.46	Chr1		Swetha 07072	DREB A-6	0		DREB-A1	18	1	0	0	0	0	0	0	0	0	0	0	0	0	0	0	0	19		Baizhima	51-100bp	83
Swetha_02066	PF00847	AP2 domain	0	354	39331.2	9.15	Chr1		Swetha 07074	DREB A-6	0		DREB-A2	27	1	3	0	0	1	0	0	0	0	0	0	0	0	0	0	0	32		Baizhima	101-200bp	50
Swetha_02076	PF00847	AP2 domain	0	354	39331.2	9.15	Chr1		Baizhima 05006	DREB A-6	0		DREB-A3	2	0	5	0	0	0	0	0	0	0	0	0	0	0	0	0	0	7		Baizhima	201-400bp	33
Swetha_02245	PF00847	AP2 domain	5	753	83972.5	5.17	Chr1		Yuzhi11 05083	DREB A-6	0		DREB-A4	64	4	1	0	1	1	0	0	0	0	0	0	0	0	0	0	0	71		Baizhima	401-600bp	50
Swetha_02342	PF00847	AP2 domain	0	225	24213.7	5.19	Chr1		Zhongzhi13 07468	DREB A-6	0		DREB-A5	39	4	1	0	0	0	0	0	0	0	0	0	0	0	0	0	0	44		Baizhima	601-1000bp	76
Swetha_02415	PF00847	AP2 domain	3	273	30159.5	8.45	Chr1		Mishuozhima 09175	DREB A-6	0		DREB-A6	33	1	1	0	0	0	0	0	0	0	0	0	0	0	0	0	0	35		Baizhima	1001-2000bp	20
Swetha_02461	PF00847	AP2 domain	11	756	83795.9	8.98	Chr1		Baizhima 09679	DREB A-6	0		DREB-B2	0	0	0	3	0	0	0	0	0	0	0	0	0	0	0	0	0	3		Mishouzhima	1-50bp	34
Swetha_02512	PF00847	AP2 domain	11	746	81396.5	8.67	Chr1		Yuzhi11 21970	DREB A-6	0		ERF-B1	50	6	0	0	0	0	0	0	0	0	0	0	0	0	0	0	0	56		Mishouzhima	51-100bp	85
Swetha_02835	PF00847	AP2 domain	20	1936	217139	5.66	Chr1		Zhongzhi13 32245	DREB A-6	0		ERF-B2	1	17	0	0	0	1	0	0	0	0	0	0	0	0	0	0	0	19		Mishouzhima	101-200bp	50
Swetha_03136	PF00847	AP2 domain	0	211	23688.5	6.66	Chr1		Baizhima_01209	DREB-A1	0		ERF-B3	113	19	7	0	0	0	0	0	0	0	0	0	0	0	0	0	0	139		Mishouzhima	201-400bp	32
Swetha_03138	PF00847	AP2 domain	0	187	20969.7	6.42	Chr1		Mishuozhima_03229	DREB-A1	0		ERF-B4	0	19	2	0	1	0	0	0	0	0	0	0	0	0	0	0	0	22		Mishouzhima	401-600bp	50
Swetha_03139	PF00847	AP2 domain	1	245	27098.6	8.47	Chr1		Zhongzhi13_01108	DREB-A1	0		ERF-B5	31	1	0	0	0	0	0	0	0	1	0	0	0	0	0	0	0	33		Mishouzhima	601-1000bp	80
Swetha_03175	PF00847	AP2 domain	0	286	30411.2	6.09	Chr1		Baizhima_16098	DREB-A1	0		ERF-B6	44	19	0	1	0	1	0	0	0	0	0	1	0	0	0	0	1	67		Mishouzhima	1001-2000bp	21
Swetha_03517	PF00847	AP2 domain	0	321	36011.5	5.29	Chr1		Yuzhi11_09511	DREB-A1	0		RAV	15	1	0	0	0	0	0	0	0	0	0	0	0	0	0	0	0	16		Swetha	1-50bp	51
Yuzhi11_00647	PF00847	AP2 domain	0	241	26.53	7.68	Chr1		Zhongzhi13_14539	DREB-A1	0		SOLOIST	0	0	0	0	0	5	1	0	0	0	0	0	0	1	0	0	0	7		Swetha	51-100bp	131
Yuzhi11_00648	PF00847	AP2 domain	2	436	47.92	4.79	Chr1		Mishuozhima_15802	DREB-A1	0		ERF	6	0	0	0	0	0	0	0	0	0	0	0	0	0	0	0	0	6		Swetha	101-200bp	94
Yuzhi11_00672	PF00847	AP2 domain	0	354	39.33	9.15	Chr1		Mishuozhima_11384	DREB-A1	0		TOTAL	443	93	21	5	5	32	24	36	24	5	4	2	6	1	1	1	1	704		Swetha	201-400bp	62
Yuzhi11_00773	PF00847	AP2 domain	1	176	19.5	5.4	Chr1		Zhongzhi13_09430	DREB-A1	0																						Swetha	401-600bp	58
Yuzhi11_00808	PF00847	AP2 domain	12	746	81.4	8.67	Chr1		Baizhima_11676	DREB-A1	0																						Swetha	601-1000bp	69
Yuzhi11_00959	PF00847	AP2 domain	4	393	43.5	5.45	Chr1		Swetha_23957	DREB-A1	0																						Swetha	1001-2000bp	21
Yuzhi11_01226	PF00847	AP2 domain	0	211	23.7	6.66	Chr1		Mishuozhima_18276	DREB-A1	0																						Yuzhi	1-50bp	32
Yuzhi11_01227	PF00847	AP2 domain	0	187	20.97	6.42	Chr1		Baizhima_18591	DREB-A1	0																						Yuzhi	51-100bp	81
Yuzhi11_01228	PF00847	AP2 domain	1	245	27.1	8.47	Chr1		Yuzhi11_14103	DREB-A1	0																						Yuzhi	101-200bp	49
Yuzhi11_01236	PF00847	AP2 domain	0	155	17.4	9.89	Chr1		Yuzhi11_14166	DREB-A1	0																						Yuzhi	201-400bp	35
Yuzhi11_01251	PF00847	AP2 domain	0	286	30.41	6.09	Chr1		Mishuozhima_21198	DREB-A1	0																						Yuzhi	401-600bp	39
Yuzhi11_01370	PF00847	AP2 domain	0	272	29.94	8.58	Chr1		Baizhima_21615	DREB-A1	0																						Yuzhi	601-1000bp	70
Yuzhi11_01497	PF00847	AP2 domain	0	321	36.01	5.29	Chr1		Swetha_28226	DREB-A1	0																						Yuzhi	1001-2000bp	21
Zhongzhi13_00224	PF00847	AP2 domain	0	243	26000.7	5.05	chr1		Yuzhi11_20097	DREB-A2	0																						Zhongzhi	1-50bp	38
Zhongzhi13_01108	PF00847	AP2 domain	0	187	20142.5	9.42	chr1		Zhongzhi13_29442	DREB-A2	0																						Zhongzhi	51-100bp	87
Zhongzhi13_01115	PF00847	AP2 domain	0	229	25100.2	5.98	chr1		Swetha_04806	DREB-A2	0																						Zhongzhi	101-200bp	48
Zhongzhi13_01334	PF00847	AP2 domain	0	329	35921.8	5.05	chr1		Mishuozhima_02700	DREB-A2	0																						Zhongzhi	201-400bp	39
Zhongzhi13_01351	PF00847	AP2 domain	0	297	32315.2	9.08	chr1		Baizhima_00193	DREB-A2	0																						Zhongzhi	401-600bp	50
Zhongzhi13_01568	PF00847	AP2 domain	0	241	26526.9	7.68	chr1		Yuzhi11 05704	DREB-A2	0																						Zhongzhi	601-1000bp	71
Zhongzhi13_01594	PF00847	AP2 domain	0	354	39357.3	9.15	chr1		Zhongzhi13 08144	DREB-A2	0																						Zhongzhi	1001-2000bp	19
Zhongzhi13_01790	PF00847	AP2 domain	0	225	24213.7	5.19	chr1		Swetha 13359	DREB-A2	0
Zhongzhi13_02427	PF00847	AP2 domain	0	211	23688.5	6.66	chr1		Mishuozhima 10337	DREB-A2	0
Zhongzhi13_02428	PF00847	AP2 domain	0	187	20969.7	6.42	chr1		Baizhima 10607	DREB-A2	0
Zhongzhi13_02453	PF00847	AP2 domain	0	286	30411.2	6.09	chr1		Baizhima 17826	DREB-A2	0
Zhongzhi13_02575	PF00847	AP2 domain	0	272	29938.1	8.58	chr1		Mishuozhima 17441	DREB-A2	0
Zhongzhi13_02701	PF00847	AP2 domain	0	321	36011.5	5.29	chr1		Swetha 05110	DREB-A2	0
SIN_1010767	PF00847	AP2 domain	1	178	20127.6	8.77	chr1		Yuzhi11 22135	DREB-A2	0
Zhongzhi13_01706	PF00847	AP2 domain	1	391	43171.6	4.97	chr1		Zhongzhi13 16722	DREB-A2	0
Zhongzhi13_01852	PF00847	AP2 domain	1	187	20441.2	8.75	chr1		Baizhima 18345	DREB-A2	0
Zhongzhi13_02429	PF00847	AP2 domain	1	245	27098.6	8.47	chr1		Mishuozhima 18000	DREB-A2	0
Zhongzhi13_02437	PF00847	AP2 domain	1	132	14628.1	9.64	chr1		Zhongzhi13 17360	DREB-A2	0
Zhongzhi13_01569	PF00847	AP2 domain	2	436	47923.9	4.79	chr1		Yuzhi11 11449	DREB-A2	0
Zhongzhi13_02194	PF00847	AP2 domain	4	393	43510.1	5.45	chr1		Zhongzhi13 09690	DREB-A2	0
Zhongzhi13_01920	PF00847	AP2 domain	12	746	81396.5	8.67	chr1		Yuzhi11 06486	DREB-A2	0
Mishuozhima_00404	PF00847	AP2 domain	0	243	25990.6	5.05	Chr1		Mishuozhima 11633	DREB-A2	0
Mishuozhima_00970	PF00847	AP2 domain	0	229	25039.1	5.98	Chr1		Baizhima 18635	DREB-A2	0
Mishuozhima_01170	PF00847	AP2 domain	0	329	35921.8	5.05	Chr1		Mishuozhima 18331	DREB-A2	0
Mishuozhima_01185	PF00847	AP2 domain	0	297	32301.2	9.08	Chr1		Yuzhi11 11741	DREB-A2	0
Mishuozhima_01344	PF00847	AP2 domain	0	241	26526.9	7.68	Chr1		Zhongzhi13 17725	DREB-A2	0
Mishuozhima_01345	PF00847	AP2 domain	2	436	47923.9	4.79	Chr1		Swetha 24055	DREB-A2	0
Mishuozhima_01370	PF00847	AP2 domain	0	354	39357.3	9.15	Chr1		Swetha 15194	DREB-A3	0
Mishuozhima_01491	PF00847	AP2 domain	1	391	43171.6	4.97	Chr1		Yuzhi11 06514	DREB-A3	0
Mishuozhima_01555	PF00847	AP2 domain	0	225	24213.7	5.19	Chr1		Baizhima_00614	DREB-A4	0
Mishuozhima_01616	PF00847	AP2 domain	1	187	20455.2	8.75	Chr1		Mishuozhima_00404	DREB-A4	0
Mishuozhima_01646	PF00847	AP2 domain	5	457	52177.8	5.51	Chr1		Swetha_05899	DREB-A4	0
Mishuozhima_01681	PF00847	AP2 domain	12	746	81396.5	8.67	Chr1		Zhongzhi13_00224	DREB-A4	0
Mishuozhima_01934	PF00847	AP2 domain	5	403	44808.7	5.6	Chr1		Yuzhi11_19341	DREB-A4	0
Mishuozhima_02121	PF00847	AP2 domain	0	211	23688.5	6.66	Chr1		Mishuozhima_14812	DREB-A4	0
Mishuozhima_02122	PF00847	AP2 domain	0	187	20969.7	6.42	Chr1		Swetha_19431	DREB-A4	0
Mishuozhima_02123	PF00847	AP2 domain	0	245	27098.6	8.47	Chr1		Baizhima_15153	DREB-A4	0
Mishuozhima_02131	PF00847	AP2 domain	1	149	16752.9	9.99	Chr1		Yuzhi11_23269	DREB-A4	0
Mishuozhima_02146	PF00847	AP2 domain	0	286	30453.2	5.89	Chr1		Yuzhi11_10447	DREB-A4	0
Mishuozhima_02270	PF00847	AP2 domain	0	272	29938.1	8.58	Chr1		Zhongzhi13_01790	DREB-A4	0
Mishuozhima_02396	PF00847	AP2 domain	0	321	36011.5	5.29	Chr1		Swetha_06472	DREB-A4	0
Baizhima_00614	PF00847	AP2 domain	0	243	25990.6	5.05	Chr1		Swetha_02342	DREB-A4	0
Baizhima_01209	PF00847	AP2 domain	0	211	23253.8	5.47	Chr1		Mishuozhima_01555	DREB-A4	0
Baizhima_01214	PF00847	AP2 domain	0	229	25010.1	5.98	Chr1		Baizhima_03772	DREB-A4	0
Baizhima_01396	PF00847	AP2 domain	0	329	35921.8	5.05	Chr1		Baizhima_08625	DREB-A4	0
Baizhima_01580	PF00847	AP2 domain	0	241	26526.9	7.68	Chr1		Mishuozhima_08136	DREB-A4	0
Baizhima_01581	PF00847	AP2 domain	2	436	47923.9	4.79	Chr1		Yuzhi11_04085	DREB-A4	0
Baizhima_01712	PF00847	AP2 domain	1	391	43171.6	4.97	Chr1		Zhongzhi13_06212	DREB-A4	0
Baizhima_01822	PF00847	AP2 domain	1	187	20455.2	8.75	Chr1		Mishuozhima_13532	DREB-A4	0
Baizhima_01854	PF00847	AP2 domain	1	176	19511.9	5.82	Chr1		Zhongzhi13_11895	DREB-A4	0
Baizhima_01880	PF00847	AP2 domain	12	746	81396.5	8.67	Chr1		Baizhima_13836	DREB-A4	0
Baizhima_02291	PF00847	AP2 domain	0	211	23688.5	6.66	Chr1		Yuzhi11_18435	DREB-A4	0
Baizhima_02292	PF00847	AP2 domain	0	187	20969.7	6.42	Chr1		Zhongzhi13_27622	DREB-A4	0
Baizhima_02293	PF00847	AP2 domain	1	245	27098.6	8.47	Chr1		Baizhima_26830	DREB-A4	0
Baizhima_02301	PF00847	AP2 domain	1	149	16752.9	9.99	Chr1		Mishuozhima_26242	DREB-A4	0
Baizhima_02316	PF00847	AP2 domain	0	286	30411.2	6.09	Chr1		Baizhima_02316	DREB-A4	0
Baizhima_02440	PF00847	AP2 domain	0	272	29938.1	8.58	Chr1		Swetha_03175	DREB-A4	0
Baizhima_02568	PF00847	AP2 domain	0	321	36011.5	5.29	Chr1		Yuzhi11_01251	DREB-A4	0
Swetha_31874	PF00847	AP2 domain	0	269	29743.9	6.72	Chr10		Zhongzhi13_02453	DREB-A4	0
Swetha_33068	PF00847	AP2 domain	3	272	30473.6	4.58	Chr10		Mishuozhima_02146	DREB-A4	0
Swetha_33069	PF00847	AP2 domain	7	519	58610.3	6.16	Chr10		Mishuozhima_25727	DREB-A4	0
Swetha_33643	PF00847	AP2 domain	0	419	46233.7	7.74	Chr10		Zhongzhi13_26907	DREB-A4	0
Swetha_33901	PF00847	AP2 domain	0	236	26222.9	5.28	Chr10		Baizhima_04674	DREB-A4	0
Swetha_33902	PF00847	AP2 domain	0	134	15112.9	9.21	Chr10		Yuzhi11_18087	DREB-A4	0
Swetha_34339	PF00847	AP2 domain	1	208	23334.2	5.77	Chr10		Yuzhi11_09349	DREB-A4	0
Yuzhi11_16281	PF00847	AP2 domain	0	269	29743.9	6.72	Chr10		Swetha_20270	DREB-A4	0
Yuzhi11_17013	PF00847	AP2 domain	5	401	45207.1	5.99	Chr10		Baizhima_07127	DREB-A4	0
Yuzhi11_17392	PF00847	AP2 domain	0	236	26222.9	5.28	Chr10		Mishuozhima_15803	DREB-A4	0
Yuzhi11_17393	PF00847	AP2 domain	0	134	15127	9.21	Chr10		Zhongzhi13 14540	DREB-A4	0
Yuzhi11_17394	PF00847	AP2 domain	0	130	14557.1	6.31	Chr10		Baizhima_16099	DREB-A4	0
Yuzhi11_17670	PF00847	AP2 domain	0	342	37677	5.32	Chr10		Yuzhi11_09512	DREB-A4	0
Yuzhi11_17733	PF00847	AP2 domain	1	225	25407.7	6.54	Chr10		Baizhima_11675	DREB-A4	0
Zhongzhi13_24308	PF00847	AP2 domain	0	269	29743.9	6.72	chr10		Mishuozhima_11383	DREB-A4	0
Zhongzhi13_25868	PF00847	AP2 domain	0	419	46177.6	7.14	chr10		Zhongzhi13_09429	DREB-A4	0
Zhongzhi13_26064	PF00847	AP2 domain	0	236	26222.9	5.28	chr10		Baizhima_12303	DREB-A4	0
Zhongzhi13_26065	PF00847	AP2 domain	0	134	15127	9.21	chr10		Yuzhi11_06905	DREB-A4	0
Zhongzhi13_26066	PF00847	AP2 domain	0	130	14557.1	6.31	chr10		Swetha_15741	DREB-A4	0
Zhongzhi13_26346	PF00847	AP2 domain	0	342	37677	5.32	chr10		Baizhima_14217	DREB-A4	0
Zhongzhi13_25401	PF00847	AP2 domain	7	519	58610.3	6.16	chr10		Mishuozhima_13929	DREB-A4	0
Mishuozhima_23699	PF00847	AP2 domain	0	269	29743.9	6.72	Chr10		Zhongzhi13_12318	DREB-A4	0
Mishuozhima_24551	PF00847	AP2 domain	7	519	58610.3	6.16	Chr10		Yuzhi11 01606	DREB-A4	0
Mishuozhima_24951	PF00847	AP2 domain	0	419	46177.6	7.14	Chr10		Zhongzhi13 02825	DREB-A4	0
Mishuozhima_25075	PF00847	AP2 domain	0	236	26222.9	5.28	Chr10		Swetha 04095	DREB-A4	0
Mishuozhima_25076	PF00847	AP2 domain	0	134	15127	9.21	Chr10		Mishuozhima 04624	DREB-A4	0
Mishuozhima_25077	PF00847	AP2 domain	0	130	14557.1	6.31	Chr10		Baizhima 04831	DREB-A4	0
Mishuozhima_25299	PF00847	AP2 domain	0	342	37677	5.32	Chr10		Mishuozhima_21812	DREB--A4	0
Mishuozhima_25363	PF00847	AP2 domain	1	225	25407.7	6.54	Chr10		Swetha_29177	DREB--A4	0
Baizhima_24126	PF00847	AP2 domain	0	269	29743.9	6.72	Chr10		Yuzhi11_14834	DREB--A4	0
Baizhima_25029	PF00847	AP2 domain	7	519	58610.3	6.16	Chr10		Zhongzhi13_22112	DREB--A4	0
Baizhima_25424	PF00847	AP2 domain	0	419	46177.6	7.14	Chr10		Baizhima_22183	DREB--A4	0
Baizhima_25570	PF00847	AP2 domain	0	236	26222.9	5.28	Chr10		Baizhima_01214	DREB--A4	0
Baizhima_25571	PF00847	AP2 domain	0	134	15127	9.21	Chr10		Mishuozhima_00970	DREB--A4	0
Baizhima_25572	PF00847	AP2 domain	0	130	14557.1	6.31	Chr10		Zhongzhi13_01115	DREB--A4	0
Baizhima_25817	PF00847	AP2 domain	0	342	37677	5.32	Chr10		Swetha 17848	DREB-A5	0
Baizhima_25882	PF00847	AP2 domain	0	153	17423.7	5.44	Chr10		Zhongzhi13 12070	DREB-A5	0
Swetha_34631	PF00847	AP2 domain	0	315	35438.5	5.95	Chr11		Baizhima 26970	DREB-A5	0
Swetha_35823	PF00847	AP2 domain	0	224	24707.1	4.56	Chr11		Swetha 35823	DREB-A5	0
Yuzhi11_17932	PF00847	AP2 domain	0	315	35438.5	5.95	Chr11		Yuzhi11 18617	DREB-A5	0
Yuzhi11_18087	PF00847	AP2 domain	0	252	27605.3	5.59	Chr11		Zhongzhi13 27806	DREB-A5	0
Yuzhi11_18435	PF00847	AP2 domain	0	243	26759.8	5.45	Chr11		Mishuozhima 26404	DREB-A5	0
Yuzhi11_18616	PF00847	AP2 domain	0	171	18377.4	6.14	Chr11		Mishuozhima 26403	DREB-A5	0
Yuzhi11_18617	PF00847	AP2 domain	0	224	24664.1	4.5	Chr11		Yuzhi11 18616	DREB-A5	0
Zhongzhi13_26640	PF00847	AP2 domain	0	315	35438.5	5.95	chr11		Baizhima 26969	DREB-A5	0
Zhongzhi13_26907	PF00847	AP2 domain	0	252	27591.2	5.59	chr11		Baizhima 15050	DREB-A5	0
Zhongzhi13_27622	PF00847	AP2 domain	0	243	26759.8	5.45	chr11		Mishuozhima 14723	DREB-A5	0
Zhongzhi13_27806	PF00847	AP2 domain	0	224	24664.1	4.5	chr11		Yuzhi11 16046	DREB-A5	0
Mishuozhima_25500	PF00847	AP2 domain	9	813	90344.6	8.86	Chr11		Zhongzhi13 13215	DREB-A5	0
Mishuozhima_25727	PF00847	AP2 domain	0	252	27591.2	5.59	Chr11		SIN 1005434	DREB-A5	0
Mishuozhima_26242	PF00847	AP2 domain	0	243	26759.8	5.45	Chr11		Yuzhi11 05219	DREB-A5	0
Mishuozhima_26403	PF00847	AP2 domain	0	171	18377.4	6.14	Chr11		Zhongzhi13 07628	DREB-A5	0
Mishuozhima_26404	PF00847	AP2 domain	0	224	24664.1	4.5	Chr11		Swetha 12700	DREB-A5	0
Baizhima_26041	PF00847	AP2 domain	0	315	35438.5	5.95	Chr11		Baizhima 09833	DREB-A5	0
Baizhima_26830	PF00847	AP2 domain	0	243	26759.8	5.45	Chr11		Mishuozhima 09316	DREB-A5	0
Baizhima_26969	PF00847	AP2 domain	0	171	18377.4	6.14	Chr11		Baizhima 23619	DREB-A5	0
Baizhima_26970	PF00847	AP2 domain	0	224	24707.1	4.56	Chr11		Mishuozhima 23246	DREB-A5	0
Swetha_36738	PF00847	AP2 domain	1	124	13465.1	9.92	Chr12		Baizhima 30580	DREB-A5	0
Swetha_38592	PF00847	AP2 domain	0	150	16309.6	9.69	Chr12		Yuzhi11 21769	DREB-A5	0
Swetha_38593	PF00847	AP2 domain	0	233	25348.6	10.24	Chr12		Mishuozhima 30031	DREB-A5	0
Swetha_38628	PF00847	AP2 domain	0	158	17460.4	6.91	Chr12		Baizhima 04836	DREB-A5	0
Swetha_38629	PF00847	AP2 domain	0	272	30794.5	5.16	Chr12		Zhongzhi13 02830	DREB-A5	0
Swetha_38630	PF00847	AP2 domain	0	158	17460.4	6.91	Chr12		Mishuozhima 04629	DREB-A5	0
Swetha_39000	PF00847	AP2 domain	6	413	45938.4	9.06	Chr12		Swetha 06775	DREB-A5	0
Yuzhi11_19541	PF00847	AP2 domain	0	221	23634.5	8.83	Chr12		Swetha 04100	DREB-A5	0
Yuzhi11_19862	PF00847	AP2 domain	1	163	18468.2	9.59	Chr12		Yuzhi11 02176	DREB-A5	0
Yuzhi11_20097	PF00847	AP2 domain	0	350	39569.3	6.41	Chr12		Zhongzhi13 03469	DREB-A5	0
Yuzhi11_20263	PF00847	AP2 domain	0	235	25891.9	6.83	Chr12		Baizhima 05379	DREB-A5	0
Yuzhi11_20658	PF00847	AP2 domain	0	233	25334.6	10.24	Chr12		Mishuozhima 05223	DREB-A5	0
Yuzhi11_20673	PF00847	AP2 domain	0	150	16309.6	9.69	Chr12		Baizhima 07378	DREB-A5	0
Yuzhi11_20703	PF00847	AP2 domain	0	144	16157.1	10.13	Chr12		Mishuozhima 09600	DREB-A5	0
Yuzhi11_20704	PF00847	AP2 domain	0	272	30794.5	5.16	Chr12		Swetha 13076	DREB-A5	0
Zhongzhi13_28562	PF00847	AP2 domain	0	221	23634.5	8.83	chr12		Yuzhi11 05512	DREB-A5	0
Zhongzhi13_29442	PF00847	AP2 domain	0	350	39569.3	6.41	chr12		Zhongzhi13 07931	DREB-A5	0
Zhongzhi13_29600	PF00847	AP2 domain	0	235	25865.9	6.9	chr12		Swetha 41134	DREB-A6	0
Zhongzhi13_30136	PF00847	AP2 domain	0	150	16309.6	9.69	chr12		Mishuozhima 30248	DREB-A6	0
Zhongzhi13_30166	PF00847	AP2 domain	0	144	16157.1	10.13	chr12		Baizhima 30810	DREB-A6	0
Zhongzhi13_30167	PF00847	AP2 domain	0	272	30794.5	5.16	chr12		Mishuozhima 22144	DREB-A6	0
Zhongzhi13_30137	PF00847	AP2 domain	1	253	27605.4	10.55	chr12		Yuzhi11 15086	DREB-A6	0
Zhongzhi13_30427	PF00847	AP2 domain	6	413	45938.4	9.06	chr12		Zhongzhi13 22498	DREB-A6	0
Mishuozhima_27043	PF00847	AP2 domain	0	221	23634.5	8.83	Chr12		Mishuozhima 01185	DREB-A6	0
Mishuozhima_27975	PF00847	AP2 domain	0	235	25891.9	6.83	Chr12		Yuzhi11 22952	DREB-A6	0
Mishuozhima_28467	PF00847	AP2 domain	0	150	16309.6	9.69	Chr12		Baizhima 07499	DREB-A6	0
Mishuozhima_28717	PF00847	AP2 domain	6	413	45938.4	9.06	Chr12		Zhongzhi13 01351	DREB-A6	0
Baizhima_27695	PF00847	AP2 domain	0	221	23634.5	8.83	Chr12		Mishuozhima 14540	DREB-A6	0
Baizhima_28542	PF00847	AP2 domain	0	235	25891.9	6.83	Chr12		Yuzhi11 08737	DREB-A6	0
Baizhima_29001	PF00847	AP2 domain	0	150	16309.6	9.69	Chr12		Baizhima 14839	DREB-A6	0
Baizhima_29002	PF00847	AP2 domain	0	233	25334.6	10.24	Chr12		Baizhima 09478	DREB-A6	0
Baizhima_29032	PF00847	AP2 domain	0	144	16157.1	10.13	Chr12		Yuzhi11 04823	DREB-A6	0
Baizhima_29033	PF00847	AP2 domain	0	272	30794.5	5.16	Chr12		Mishuozhima 08966	DREB-A6	0
Baizhima_29293	PF00847	AP2 domain	6	413	45938.4	9.06	Chr12		Baizhima 25424	DREB-A6	0
Swetha_39151	PF00847	AP2 domain	0	229	25278.3	5.19	Chr13		Mishuozhima 24951	DREB-A6	0
Swetha_40799	PF00847	AP2 domain	7	592	65799.5	6.17	Chr13		Yuzhi11 25993	DREB-A6	0
Swetha_40862	PF00847	AP2 domain	8	509	56651.7	8.4	Chr13		Zhongzhi13 25868	DREB-A6	0
Swetha_41017	PF00847	AP2 domain	8	512	55915.2	6.36	Chr13		Swetha 33643	DREB-A6	0
Swetha_41134	PF00847	AP2 domain	0	369	40669	6.15	Chr13		Baizhima 14011	DREB-A6	0
Yuzhi11_21145	PF00847	AP2 domain	0	228	25112.9	8.3	Chr13		Mishuozhima 02619	DREB-A6	0
Yuzhi11_21769	PF00847	AP2 domain	0	152	16459.4	9.55	Chr13		Baizhima_04040	ERF	0
Yuzhi11_21770	PF00847	AP2 domain	8	509	56651.7	8.4	Chr13		Swetha_03929	ERF	0
Yuzhi11_21887	PF00847	AP2 domain	6	474	51752	5.78	Chr13		Mishuozhima_18673	ERF	0
Yuzhi11_21970	PF00847	AP2 domain	0	369	40669	6.15	Chr13		Yuzhi11_12060	ERF	0
Zhongzhi13_31185	PF00847	AP2 domain	0	228	25112.9	8.3	chr13		Zhongzhi13_18090	ERF	0
Zhongzhi13_32245	PF00847	AP2 domain	0	369	40669	6.15	chr13		Swetha_24518	ERF	0
Zhongzhi13_32012	PF00847	AP2 domain	1	121	13216.2	10.5	chr13		Swetha 33902	ERF-B1	0
Zhongzhi13_32148	PF00847	AP2 domain	6	474	51752	5.78	chr13		Mishuozhima 02564	ERF-B1	0
Zhongzhi13_31963	PF00847	AP2 domain	7	592	65799.5	6.17	chr13		Yuzhi11 20658	ERF-B1	0
Zhongzhi13_32014	PF00847	AP2 domain	8	509	56651.7	8.4	chr13		Baizhima 29002	ERF-B1	0
Mishuozhima_29334	PF00847	AP2 domain	0	228	25112.9	8.3	Chr13		Swetha 38593	ERF-B1	0
Mishuozhima_30005	PF00847	AP2 domain	7	592	65799.5	6017	Chr13		Baizhima 28542	ERF-B1	0
Mishuozhima_30031	PF00847	AP2 domain	0	152	16459.4	9.55	Chr13		Mishuozhima 27975	ERF-B1	0
Mishuozhima_30032	PF00847	AP2 domain	8	509	56651.7	8.4	Chr13		Yuzhi11 20263	ERF-B1	0
Mishuozhima_30161	PF00847	AP2 domain	6	441	48066.1	6.42	Chr13		Zhongzhi13 29600	ERF-B1	0
Mishuozhima_30248	PF00847	AP2 domain	0	369	40669	6.15	Chr13		Baizhima 29885	ERF-B1	0
Baizhima_29885	PF00847	AP2 domain	0	228	25112.9	8.3	Chr13		Yuzhi11 21145	ERF-B1	0
Baizhima_30580	PF00847	AP2 domain	0	152	16459.4	9.55	Chr13		Zhongzhi13 31185	ERF-B1	0
Baizhima_30581	PF00847	AP2 domain	8	509	56651.7	8.4	Chr13		Mishuozhima 29334	ERF-B1	0
Baizhima_30706	PF00847	AP2 domain	6	441	48066.1	6.42	Chr13		Yuzhi11 20673	ERF-B1	0
Baizhima_30810	PF00847	AP2 domain	0	369	40669	6.15	Chr13		Mishuozhima 28467	ERF-B1	0
Swetha_06775	PF00847	AP2 domain	0	169	18619.8	7.75	Chr2		Baizhima 29001	ERF-B1	0
Swetha_07072	PF00847	AP2 domain	0	343	37895.8	5.62	Chr2		Zhongzhi13 30136	ERF-B1	0
Swetha_07074	PF00847	AP2 domain	0	343	37895.8	5.62	Chr2		Swetha 38592	ERF-B1	0
Swetha_07942	PF00847	AP2 domain	11	656	73590.5	9.06	Chr2		Yuzhi11 22839	ERF-B1	0
Swetha_08528	PF00847	AP2 domain	6	399	44890	9.25	Chr2		Zhongzhi13 04906	ERF-B1	0
Swetha_08985	PF00847	AP2 domain	0	341	37957.6	4.9	Chr2		Mishuozhima 06466	ERF-B1	0
Swetha_08993	PF00847	AP2 domain	0	211	23790.7	7.64	Chr2		Baizhima 06606	ERF-B1	0
Swetha_08994	PF00847	AP2 domain	0	354	39305	4.65	Chr2		Swetha 09366	ERF-B1	0
Swetha_09024	PF00847	AP2 domain	0	374	40981.7	8.83	Chr2		Yuzhi11 13059	ERF-B1	0
Swetha_09366	PF00847	AP2 domain	0	390	42419.7	5.31	Chr2		Zhongzhi13 19932	ERF-B1	0
Swetha_09370	PF00847	AP2 domain	1	234	25644.8	9.98	Chr2		Swetha 26389	ERF-B1	0
Yuzhi11_01606	PF00847	AP2 domain	0	174	19.41	5.67	Chr2		Swetha 26388	ERF-B1	0
Yuzhi11_01813	PF00847	AP2 domain	2	381	41.35	8.9	Chr2		Mishuozhima 20047	ERF-B1	0
Yuzhi11_01909	PF00847	AP2 domain	1	417	44.97	7.86	Chr2		Baizhima 20366	ERF-B1	0
Yuzhi11_02176	PF00847	AP2 domain	0	242	26.26	5.92	Chr2		Baizhima 03230	ERF-B1	0
Yuzhi11_02279	PF00847	AP2 domain	1	127	14.73	10.25	Chr2		Mishuozhima 04553	ERF-B1	0
Yuzhi11_02342	PF00847	AP2 domain	5	334	37.45	6.67	Chr2		Swetha 00307	ERF-B1	0
Yuzhi11_02483	PF00847	AP2 domain	7	490	52.84	6.75	Chr2		Yuzhi11 22396	ERF-B1	0
Yuzhi11_02708	PF00847	AP2 domain	6	399	44.87	9.18	Chr2		Zhongzhi13 20134	ERF-B1	0
SIN_1005434	PF00847	AP2 domain	0	149	16633.6	9.4	chr2		Baizhima 03231	ERF-B1	0
Zhongzhi13_02825	PF00847	AP2 domain	0	174	19406.7	5.67	chr2		Mishuozhima 04554	ERF-B1	0
Zhongzhi13_02830	PF00847	AP2 domain	0	219	23932.8	8.34	chr2		Swetha 00306	ERF-B1	0
Zhongzhi13_03469	PF00847	AP2 domain	0	242	26264.9	5.92	chr2		Zhongzhi13 20133	ERF-B1	0
Zhongzhi13_04635	PF00847	AP2 domain	0	211	23790.7	7.64	chr2		Yuzhi11 22397	ERF-B1	0
Zhongzhi13_04636	PF00847	AP2 domain	0	354	39305	4.65	chr2		Mishuozhima 00166	ERF-B1	0
Zhongzhi13_04659	PF00847	AP2 domain	0	374	40981.7	8.83	chr2		Zhongzhi13 12680	ERF-B1	0
Zhongzhi13_04906	PF00847	AP2 domain	0	390	42419.7	5.31	chr2		Baizhima 14556	ERF-B1	0
Zhongzhi13_03050	PF00847	AP2 domain	1	304	33622.8	5	chr2		Yuzhi11 17670	ERF-B1	0
Zhongzhi13_03306	PF00847	AP2 domain	1	417	44974.3	7.86	chr2		Zhongzhi13 26346	ERF-B1	0
Zhongzhi13_03834	PF00847	AP2 domain	5	334	37447.6	6.67	chr2		Mishuozhima 25299	ERF-B1	0
Zhongzhi13_04281	PF00847	AP2 domain	6	399	44890	9.25	chr2		Baizhima 25817	ERF-B1	0
Zhongzhi13_03999	PF00847	AP2 domain	7	490	52813	6.72	chr2		Swetha 05085	ERF-B1	0
Mishuozhima_04624	PF00847	AP2 domain	0	174	19406.7	5.67	Chr2		Zhongzhi13 06890	ERF-B1	0
Mishuozhima_04629	PF00847	AP2 domain	0	169	18619.8	7.75	Chr2		Mishuozhima 02680	ERF-B1	0
Mishuozhima_04837	PF00847	AP2 domain	0	343	37895.8	5.62	Chr2		Baizhima 03787	ERF-B1	0
Mishuozhima_05067	PF00847	AP2 domain	1	417	44974.3	7.86	Chr2		Baizhima 25882	ERF-B2	0
Mishuozhima_05223	PF00847	AP2 domain	0	241	26179.8	5.92	Chr2		Swetha 38628	ERF-B3	0
Mishuozhima_05384	PF00847	AP2 domain	1	127	14725.9	10.25	Chr2		Swetha 38630	ERF-B3	0
Mishuozhima_05483	PF00847	AP2 domain	5	334	37447.6	6.67	Chr2		Mishuozhima 02534	ERF-B3	0
Mishuozhima_05634	PF00847	AP2 domain	7	491	52927.1	6.72	Chr2		Zhongzhi13 30166	ERF-B3	0
Mishuozhima_05883	PF00847	AP2 domain	6	399	44890	9.25	Chr2		Baizhima 29032	ERF-B3	0
Mishuozhima_06212	PF00847	AP2 domain	0	211	23790.7	7.64	Chr2		Yuzhi11 20703	ERF-B3	0
Mishuozhima_06213	PF00847	AP2 domain	0	362	40153.8	4.57	Chr2		Baizhima 29033	ERF-B3	0
Mishuozhima_06235	PF00847	AP2 domain	0	374	40981.7	8.83	Chr2		Mishuozhima 02533	ERF-B3	0
Mishuozhima_06466	PF00847	AP2 domain	0	390	42419.7	5.31	Chr2		Swetha 38629	ERF-B3	0
Baizhima_04831	PF00847	AP2 domain	0	174	19406.7	5.67	Chr2		Yuzhi11 20704	ERF-B3	0
Baizhima_04836	PF00847	AP2 domain	0	169	18619.8	7.75	Chr2		Zhongzhi13 30167	ERF-B3	0
Baizhima_05006	PF00847	AP2 domain	0	343	37895.8	5.62	Chr2		Baizhima 16738	ERF-B3	0
Baizhima_05229	PF00847	AP2 domain	1	417	44974.3	7.86	Chr2		Mishuozhima 16476	ERF-B3	0
Baizhima_05379	PF00847	AP2 domain	0	242	26264.9	5.92	Chr2		Zhongzhi13 15274	ERF-B3	0
Baizhima_05558	PF00847	AP2 domain	1	127	14725.9	10.25	Chr2		Baizhima 25571	ERF-B3	0
Baizhima_05663	PF00847	AP2 domain	5	334	37447.6	6.67	Chr2		Mishuozhima 25076	ERF-B3	0
Baizhima_05820	PF00847	AP2 domain	7	491	52927.1	6.72	Chr2		Yuzhi11 17393	ERF-B3	0
Baizhima_06070	PF00847	AP2 domain	6	399	44890	9.25	Chr2		Zhongzhi13 26065	ERF-B3	0
Baizhima_06398	PF00847	AP2 domain	0	374	40981.7	8.83	Chr2		Swetha 05854	ERF-B3	0
Baizhima_06606	PF00847	AP2 domain	0	390	42419.7	5.31	Chr2		Baizhima 25572	ERF-B3	0
Swetha_10826	PF00847	AP2 domain	1	178	19042.3	7.64	Chr3		Mishuozhima 25077	ERF-B3	0
Swetha_10977	PF00847	AP2 domain	7	578	62700.8	5.92	Chr3		Yuzhi11 17394	ERF-B3	0
Swetha_11540	PF00847	AP2 domain	4	435	48778.3	9.38	Chr3		Zhongzhi13 26066	ERF-B3	0
Swetha_11545	PF00847	AP2 domain	1	311	34694.8	7.43	Chr3		Swetha 05853	ERF-B3	0
Swetha_11674	PF00847	AP2 domain	1	188	21443.2	7.15	Chr3		Yuzhi11 01226	ERF-B3	0
Swetha_11676	PF00847	AP2 domain	1	171	19502.1	8.27	Chr3		Zhongzhi13 02427	ERF-B3	0
Swetha_11741	PF00847	AP2 domain	2	208	22725.5	8.81	Chr3		Baizhima 02291	ERF-B3	0
Swetha_11899	PF00847	AP2 domain	0	234	25949	5.24	Chr3		Mishuozhima 02121	ERF-B3	0
Swetha_12618	PF00847	AP2 domain	7	554	61622.4	7.73	Chr3		Swetha 03136	ERF-B3	0
Swetha_12621	PF00847	AP2 domain	8	554	61622.4	7.73	Chr3		Baizhima 02292	ERF-B3	0
Swetha_12700	PF00847	AP2 domain	0	155	17380.4	9.05	Chr3		Mishuozhima 02122	ERF-B3	0
Swetha_13076	PF00847	AP2 domain	0	238	26144	5.5	Chr3		Zhongzhi13 02428	ERF-B3	0
Yuzhi11_04085	PF00847	AP2 domain	0	215	23.35	5.71	Chr3		Yuzhi11 01227	ERF-B3	0
Yuzhi11_04173	PF00847	AP2 domain	7	576	62.55	5.92	Chr3		Swetha 03138	ERF-B3	0
Yuzhi11_04212	PF00847	AP2 domain	1	393	43.58	4.89	Chr3		Mishuozhima 02123	ERF-B3	0
Yuzhi11_04520	PF00847	AP2 domain	1	311	34.69	7.43	Chr3		Yuzhi11 01236	ERF-B3	0
Yuzhi11_04608	PF00847	AP2 domain	1	224	25.31	8.48	Chr3		Baizhima 11813	ERF-B3	0
Yuzhi11_04663	PF00847	AP2 domain	2	171	18.86	10.26	Chr3		Yuzhi11 06437	ERF-B3	0
Yuzhi11_04823	PF00847	AP2 domain	0	347	38448.5	9.16	Chr3		Mishuozhima 11523	ERF-B3	0
Yuzhi11_05083	PF00847	AP2 domain	0	326	35647.7	6.32	Chr3		Swetha 15001	ERF-B3	0
Yuzhi11_05172	PF00847	AP2 domain	5	566	62890.1	7.03	Chr3		Zhongzhi13 09570	ERF-B3	0
Yuzhi11_05219	PF00847	AP2 domain	0	155	17380.4	9.05	Chr3		Mishuozhima 18231	ERF-B3	0
Yuzhi11_05512	PF00847	AP2 domain	0	237	26030	5.5	Chr3		Yuzhi11 11670	ERF-B3	0
Zhongzhi13_06212	PF00847	AP2 domain	0	215	23354.1	5.86	chr3		Baizhima 18557	ERF-B3	0
Zhongzhi13_06890	PF00847	AP2 domain	0	290	31605.7	10.02	chr3		Zhongzhi13 17595	ERF-B3	0
Zhongzhi13_07043	PF00847	AP2 domain	0	234	26063.1	5.25	chr3		Mishuozhima 15589	ERF-B3	0
Zhongzhi13_07468	PF00847	AP2 domain	0	330	36022.1	6.32	chr3		Zhongzhi13 14299	ERF-B3	0
Zhongzhi13_07628	PF00847	AP2 domain	0	155	17380.4	9.05	chr3		Yuzhi11 09350	ERF-B3	0
Zhongzhi13_07931	PF00847	AP2 domain	0	237	26030	5.5	chr3		Swetha 20273	ERF-B3	0
Zhongzhi13_06381	PF00847	AP2 domain	1	393	43582.2	4.89	chr3		Baizhima 15887	ERF-B3	0
Zhongzhi13_06780	PF00847	AP2 domain	1	311	34694.8	7.43	chr3		Swetha 20272	ERF-B3	0
Zhongzhi13_06883	PF00847	AP2 domain	1	224	25307.8	8.48	chr3		Baizhima 09335	ERF-B3	0
Zhongzhi13_06937	PF00847	AP2 domain	1	189	20919.5	9.58	chr3		Yuzhi11 24903	ERF-B3	0
Zhongzhi13_07576	PF00847	AP2 domain	5	566	62890.1	7.03	chr3		Zhongzhi13 07043	ERF-B3	0
Zhongzhi13_06339	PF00847	AP2 domain	8	549	59685.8	6.08	chr3		Mishuozhima 08831	ERF-B3	0
Mishuozhima_08136	PF00847	AP2 domain	0	215	23345.1	5.71	Chr3		Swetha 11899	ERF-B3	0
Mishuozhima_08252	PF00847	AP2 domain	7	576	62547.7	5.92	Chr3		Swetha 05855	ERF-B3	0
Mishuozhima_08292	PF00847	AP2 domain	1	393	43582.2	4.89	Chr3		Zhongzhi13 26064	ERF-B3	0
Mishuozhima_08624	PF00847	AP2 domain	1	311	34694.8	7.43	Chr3		Swetha 33901	ERF-B3	0
Mishuozhima_08736	PF00847	AP2 domain	1	202	22164.9	9.05	Chr3		Yuzhi11 17392	ERF-B3	0
Mishuozhima_08831	PF00847	AP2 domain	0	234	25949	5.24	Chr3		Mishuozhima 25075	ERF-B3	0
Mishuozhima_08966	PF00847	AP2 domain	0	347	38448.5	9.16	Chr3		Baizhima 25570	ERF-B3	0
Mishuozhima_09175	PF00847	AP2 domain	0	330	36013.1	6.26	Chr3		Baizhima 16736	ERF-B3	0
Mishuozhima_09280	PF00847	AP2 domain	5	566	62890.1	7.03	Chr3		Mishuozhima 16474	ERF-B3	0
Mishuozhima_09316	PF00847	AP2 domain	0	155	17380.4	9.05	Chr3		Yuzhi11 10168	ERF-B3	0
Mishuozhima_09600	PF00847	AP2 domain	0	238	26144	5.5	Chr3		Zhongzhi13 15272	ERF-B3	0
Baizhima_08625	PF00847	AP2 domain	0	215	23345.1	5.71	Chr3		Yuzhi11 06548	ERF-B3	0
Baizhima_08704	PF00847	AP2 domain	7	576	62547.7	5.92	Chr3		Swetha 03899	ERF-B3	0
Baizhima_08744	PF00847	AP2 domain	1	393	43582.2	4.89	Chr3		Baizhima 19354	ERF-B3	0
Baizhima_09111	PF00847	AP2 domain	1	311	34694.8	7.43	Chr3		Mishuozhima 19102	ERF-B3	0
Baizhima_09246	PF00847	AP2 domain	1	202	22164.9	9.05	Chr3		Swetha 25094	ERF-B3	0
Baizhima_09335	PF00847	AP2 domain	0	234	26063.1	5.25	Chr3		Zhongzhi13 18590	ERF-B3	0
Baizhima_09478	PF00847	AP2 domain	0	347	38448.5	9.16	Chr3		Baizhima 19356	ERF-B3	0
Baizhima_09679	PF00847	AP2 domain	0	330	35988.1	6.32	Chr3		Mishuozhima 19104	ERF-B3	0
Baizhima_09780	PF00847	AP2 domain	5	566	62890.1	7.03	Chr3		Zhongzhi13 18592	ERF-B3	0
Baizhima_09833	PF00847	AP2 domain	0	155	17380.4	9.05	Chr3		Swetha 25096	ERF-B3	0
Swetha_13359	PF00847	AP2 domain	0	288	32602.3	5.79	Chr4		Mishuozhima 19105	ERF-B3	0
Swetha_14615	PF00847	AP2 domain	0	401	45108.2	4.75	Chr4		Swetha 25097	ERF-B3	0
Swetha_14844	PF00847	AP2 domain	0	309	33998.9	6.53	Chr4		Zhongzhi13 18593	ERF-B3	0
Swetha_15001	PF00847	AP2 domain	0	246	26765.2	6.36	Chr4		Zhongzhi13 21210	ERF-B3	0
Swetha_15194	PF00847	AP2 domain	0	340	36299.3	5.66	Chr4		Baizhima 21476	ERF-B3	0
Swetha_15360	PF00847	AP2 domain	1	263	29653.3	4.75	Chr4		Mishuozhima 21086	ERF-B3	0
Swetha_15741	PF00847	AP2 domain	0	188	20031.4	4.97	Chr4		Swetha 04254	ERF-B3	0
Swetha_16019	PF00847	AP2 domain	8	371	40809.6	8.91	Chr4		Yuzhi11 16281	ERF-B3	0
Swetha_16020	PF00847	AP2 domain	8	348	38226.8	9.42	Chr4		Zhongzhi13 24308	ERF-B3	0
Swetha_16136	PF00847	AP2 domain	9	547	60862.9	7.07	Chr4		Swetha 31874	ERF-B3	0
Yuzhi11_05613	PF00847	AP2 domain	0	280	31449.9	5.23	Chr4		Swetha 22735	ERF-B3	0
Yuzhi11_05704	PF00847	AP2 domain	0	288	32602.3	5.79	Chr4		Mishuozhima 23699	ERF-B3	0
Yuzhi11_06179	PF00847	AP2 domain	0	401	45108.2	4.75	Chr4		Baizhima 24126	ERF-B3	0
Yuzhi11_06305	PF00847	AP2 domain	1	154	16593.7	9.55	Chr4		Swetha 39151	ERF-B3	0
Yuzhi11_06329	PF00847	AP2 domain	0	309	33998.9	6.53	Chr4		Yuzhi11 06435	ERF-B3	0
Yuzhi11_06435	PF00847	AP2 domain	0	229	25278.3	5.19	Chr4		Baizhima 18559	ERF-B3	0
Yuzhi11_06436	PF00847	AP2 domain	0	320	35654.9	7.64	Chr4		Swetha 23881	ERF-B3	0
Yuzhi11_06437	PF00847	AP2 domain	0	246	26783.3	6.36	Chr4		Yuzhi11 11672	ERF-B3	0
Yuzhi11_06486	PF00847	AP2 domain	0	364	39658.1	5.4	Chr4		Mishuozhima 18233	ERF-B3	0
Yuzhi11_06514	PF00847	AP2 domain	0	340	36315.3	5.66	Chr4		Zhongzhi13 17597	ERF-B3	0
Yuzhi11_06548	PF00847	AP2 domain	0	192	21613.1	4.63	Chr4		Yuzhi11 06436	ERF-B3	0
Yuzhi11_06905	PF00847	AP2 domain	0	188	20075.5	4.85	Chr4		Zhongzhi13 09569	ERF-B3	0
Yuzhi11_06982	PF00847	AP2 domain	8	371	40809.6	8.91	Chr4		Baizhima 11812	ERF-B3	0
Yuzhi11_07044	PF00847	AP2 domain	16	1060	116571	5.81	Chr4		Mishuozhima 04393	ERF-B3	0
Zhongzhi13_08043	PF00847	AP2 domain	0	280	31449.9	5.23	chr4		Swetha 00119	ERF-B3	0
Zhongzhi13_08144	PF00847	AP2 domain	0	288	32602.3	5.79	chr4		Yuzhi11 11671	ERF-B3	0
Zhongzhi13_09287	PF00847	AP2 domain	0	401	45108.2	4.75	chr4		Zhongzhi13 17596	ERF-B3	0
Zhongzhi13_09429	PF00847	AP2 domain	0	168	18787.3	10.03	chr4		Mishuozhima 18232	ERF-B3	0
Zhongzhi13_09430	PF00847	AP2 domain	0	225	25015	5.57	chr4		Baizhima 18558	ERF-B3	0
Zhongzhi13_09454	PF00847	AP2 domain	0	309	33998.9	6.53	chr4		Zhongzhi13 14301	ERF-B3	0
Zhongzhi13_09569	PF00847	AP2 domain	0	320	35654.9	7.64	chr4		Mishuozhima 15591	ERF-B3	0
Zhongzhi13_09570	PF00847	AP2 domain	0	227	25157.8	9.77	chr4		Baizhima 15889	ERF-B3	0
Zhongzhi13_09690	PF00847	AP2 domain	0	364	39658.1	5.4	chr4		Swetha 20276	ERF-B3	0
Zhongzhi13_09568	PF00847	AP2 domain	2	331	36735.5	5.09	chr4		Baizhima 27695	ERF-B3	0
Zhongzhi13_09719	PF00847	AP2 domain	2	366	39161.1	7.1	chr4		Mishuozhima 27043	ERF-B3	0
Zhongzhi13_09838	PF00847	AP2 domain	2	254	28500.9	4.59	chr4		Yuzhi11 19541	ERF-B3	0
Zhongzhi13_10152	PF00847	AP2 domain	2	272	29896.7	6.84	chr4		Zhongzhi13 28562	ERF-B3	0
Zhongzhi13_10370	PF00847	AP2 domain	8	445	48450.8	6.41	chr4		Baizhima 01396	ERF-B5	0
Zhongzhi13_10461	PF00847	AP2 domain	8	697	76020.1	6.23	chr4		Zhongzhi13 01334	ERF-B5	0
Mishuozhima_10236	PF00847	AP2 domain	0	280	31449.9	5.23	Chr4		Mishuozhima 01170	ERF-B5	0
Mishuozhima_10337	PF00847	AP2 domain	0	288	32602.3	5.79	Chr4		Yuzhi11 09644	ERF-B5	0
Mishuozhima_11243	PF00847	AP2 domain	0	401	45108.2	4.75	Chr4		Zhongzhi13 14672	ERF-B5	0
Mishuozhima_11383	PF00847	AP2 domain	0	198	21234.5	4.87	Chr4		Mishuozhima 15934	ERF-B5	0
Mishuozhima_11384	PF00847	AP2 domain	0	225	25015	5.57	Chr4		Baizhima 16228	ERF-B5	0
Mishuozhima_11405	PF00847	AP2 domain	0	309	33998.9	6.53	Chr4		Baizhima 11564	ERF-B5	0
Mishuozhima_11521	PF00847	AP2 domain	1	383	43118.6	5.92	Chr4		Mishuozhima 11243	ERF-B5	0
Mishuozhima_11523	PF00847	AP2 domain	0	246	26765.2	6.36	Chr4		Swetha 14615	ERF-B5	0
Mishuozhima_11633	PF00847	AP2 domain	0	364	39658.1	5.4	Chr4		Yuzhi11 06179	ERF-B5	0
Mishuozhima_11662	PF00847	AP2 domain	2	366	39161.1	7.1	Chr4		Zhongzhi13 09287	ERF-B5	0
Mishuozhima_12028	PF00847	AP2 domain	1	231	24752.8	7.72	Chr4		Yuzhi11 11606	ERF-B5	0
Mishuozhima_12226	PF00847	AP2 domain	8	445	48450.8	6.41	Chr4		Zhongzhi13 17525	ERF-B5	0
Mishuozhima_12301	PF00847	AP2 domain	8	697	76020.1	6.23	Chr4		Swetha 23786	ERF-B5	0
Baizhima_10511	PF00847	AP2 domain	0	280	31449.9	5.23	Chr4		Mishuozhima 18161	ERF-B5	0
Baizhima_10607	PF00847	AP2 domain	0	288	32602.3	5.79	Chr4		Baizhima 18494	ERF-B5	0
Baizhima_11564	PF00847	AP2 domain	0	401	45108.2	4.75	Chr4		Baizhima 02568	ERF-B5	0
Baizhima_11675	PF00847	AP2 domain	0	198	21234.5	4.87	Chr4		Zhongzhi13 02701	ERF-B5	0
Baizhima_11676	PF00847	AP2 domain	0	225	25015	5.57	Chr4		Mishuozhima 02396	ERF-B5	0
Baizhima_11699	PF00847	AP2 domain	0	309	33998.9	6.53	Chr4		Swetha 03517	ERF-B5	0
Baizhima_11811	PF00847	AP2 domain	2	331	36735.5	5.09	Chr4		Yuzhi11 01497	ERF-B5	0
Baizhima_11812	PF00847	AP2 domain	0	320	35654.9	7.64	Chr4		Baizhima 26041	ERF-B5	0
Baizhima_11813	PF00847	AP2 domain	0	246	26765.2	6.36	Chr4		Swetha 34631	ERF-B5	0
Baizhima_11916	PF00847	AP2 domain	5	697	77372.9	8.71	Chr4		Zhongzhi13 26640	ERF-B5	0
Baizhima_11945	PF00847	AP2 domain	2	366	39161.1	7.1	Chr4		Yuzhi11 17932	ERF-B5	0
Baizhima_12047	PF00847	AP2 domain	2	254	28500.9	4.59	Chr4		Yuzhi11 12372	ERF-B5	0
Baizhima_12303	PF00847	AP2 domain	0	188	20031.4	4.97	Chr4		Zhongzhi13 14877	ERF-B5	0
Baizhima_12504	PF00847	AP2 domain	8	445	48450.8	6.41	Chr4		Baizhima 16403	ERF-B5	0
Baizhima_12573	PF00847	AP2 domain	8	697	76020.1	6.23	Chr4		Mishuozhima 16115	ERF-B5	0
Swetha_17617	PF00847	AP2 domain	2	364	40801.8	7.11	Chr5		Swetha 20975	ERF-B5	0
Swetha_17848	PF00847	AP2 domain	0	224	24735.5	4.9	Chr5		Swetha 19664	ERF-B6	0
Swetha_18147	PF00847	AP2 domain	5	787	84266.4	5.77	Chr5		Mishuozhima 02687	ERF-B6	0
Swetha_18219	PF00847	AP2 domain	7	458	51473.9	6.33	Chr5		Baizhima 02440	ERF-B6	0
Swetha_18222	PF00847	AP2 domain	10	837	91986.3	5.89	Chr5		Mishuozhima 02270	ERF-B6	0
Yuzhi11_08258	PF00847	AP2 domain	9	481	53652.1	5.92	Chr5		Yuzhi11 01370	ERF-B6	0
Zhongzhi13_11895	PF00847	AP2 domain	0	268	29572.7	5.17	chr5		Zhongzhi13 02575	ERF-B6	0
Zhongzhi13_12070	PF00847	AP2 domain	0	219	24189.8	4.9	chr5		Baizhima 11699	ERF-B6	0
Zhongzhi13_12318	PF00847	AP2 domain	0	140	14900	11.09	chr5		Mishuozhima 11405	ERF-B6	0
Zhongzhi13_12386	PF00847	AP2 domain	12	711	78870.8	9.33	chr5		Swetha 14844	ERF-B6	0
Mishuozhima_13532	PF00847	AP2 domain	0	268	29572.7	5.17	Chr5		Yuzhi11 06329	ERF-B6	0
Mishuozhima_13929	PF00847	AP2 domain	0	193	20335.6	5.04	Chr5		Zhongzhi13 09454	ERF-B6	0
Mishuozhima_13998	PF00847	AP2 domain	9	452	50605.5	6.17	Chr5		Baizhima 06848	ERF-B6	0
Baizhima_13836	PF00847	AP2 domain	0	268	29572.7	5.17	Chr5		Mishuozhima 18939	ERF-B6	0
Baizhima_14011	PF00847	AP2 domain	0	224	24735.5	4.9	Chr5		Yuzhi11 12192	ERF-B6	0
Baizhima_14217	PF00847	AP2 domain	0	193	20335.6	5.04	Chr5		Zhongzhi13 18380	ERF-B6	0
Baizhima_14285	PF00847	AP2 domain	9	481	53652.1	5.92	Chr5		Baizhima 23931	ERF-B6	0
Swetha_19431	PF00847	AP2 domain	0	250	27156.2	5.31	Chr6		Mishuozhima 23541	ERF-B6	0
Swetha_19664	PF00847	AP2 domain	0	207	23104.2	8.93	Chr6		Yuzhi11 23120	ERF-B6	0
Swetha_19667	PF00847	AP2 domain	1	460	50949.6	9.1	Chr6		Zhongzhi13 24086	ERF-B6	0
Swetha_20270	PF00847	AP2 domain	0	250	27499.8	6.79	Chr6		Yuzhi11 05613	ERF-B6	0
Swetha_20272	PF00847	AP2 domain	0	239	26236	8.66	Chr6		Zhongzhi13 08043	ERF-B6	0
Swetha_20273	PF00847	AP2 domain	0	239	26236	8.66	Chr6		Mishuozhima 10236	ERF-B6	0
Swetha_20276	PF00847	AP2 domain	0	253	28183.8	6.25	Chr6		Baizhima 10511	ERF-B6	0
Swetha_20410	PF00847	AP2 domain	0	352	39588.3	5.53	Chr6		Swetha 28477	ERF-B6	0
Swetha_20564	PF00847	AP2 domain	1	271	28614.9	5.48	Chr6		Mishuozhima 21378	ERF-B6	0
Swetha_20975	PF00847	AP2 domain	0	200	22643.2	5.82	Chr6		Yuzhi11 14336	ERF-B6	0
Swetha_21316	PF00847	AP2 domain	8	669	72951.4	7.1	Chr6		Zhongzhi13 21545	ERF-B6	0
Swetha_21486	PF00847	AP2 domain	1	347	39054.9	5.91	Chr6		Baizhima 21734	ERF-B6	0
Swetha_21844	PF00847	AP2 domain	1	251	28170.4	7.66	Chr6		Baizhima 01580	ERF-B6	0
Yuzhi11_08737	PF00847	AP2 domain	0	290	32276.2	8.19	Chr6		Mishuozhima 01344	ERF-B6	0
Yuzhi11_09048	PF00847	AP2 domain	1	207	23104.2	8.93	Chr6		Yuzhi11 00647	ERF-B6	0
Yuzhi11_09349	PF00847	AP2 domain	0	250	27499.8	6.79	Chr6		Zhongzhi13 01568	ERF-B6	0
Yuzhi11_09350	PF00847	AP2 domain	0	239	26236	8.66	Chr6		Swetha 04990	ERF-B6	0
Yuzhi11_09353	PF00847	AP2 domain	1	234	25824.1	5.12	Chr6		Yuzhi11 22734	ERF-B6	0
Yuzhi11_09511	PF00847	AP2 domain	0	209	23510.6	8.18	Chr6		Zhongzhi13 04635	ERF-B6	0
Yuzhi11_09512	PF00847	AP2 domain	0	252	26943	5.46	Chr6		Swetha 08993	ERF-B6	0
Yuzhi11_09644	PF00847	AP2 domain	0	345	37678.6	5.63	Chr6		Mishuozhima 06212	ERF-B6	0
Yuzhi11_10025	PF00847	AP2 domain	10	609	66645.5	7.03	Chr6		Baizhima 03467	ERF-B6	0
Yuzhi11_10168	PF00847	AP2 domain	0	255	28340.2	5.66	Chr6		Baizhima 03468	ERF-B6	0
Yuzhi11_10169	PF00847	AP2 domain	1	239	26679.1	10.06	Chr6		Mishuozhima 06213	ERF-B6	0
Yuzhi11_10447	PF00847	AP2 domain	0	225	24213.7	5.19	Chr6		Swetha 08994	ERF-B6	0
Zhongzhi13_12680	PF00847	AP2 domain	0	156	17788.4	9.57	chr6		Yuzhi11 22735	ERF-B6	0
Zhongzhi13_13215	PF00847	AP2 domain	0	229	24983.9	4.66	chr6		Zhongzhi13 04636	ERF-B6	0
Zhongzhi13_14299	PF00847	AP2 domain	0	239	26236	8.66	chr6		Swetha 08985	ERF-B6	0
Zhongzhi13_14301	PF00847	AP2 domain	0	254	28282.9	5.92	chr6		Baizhima 06398	RAV	0
Zhongzhi13_14539	PF00847	AP2 domain	0	209	23510.6	8.18	chr6		Mishuozhima 06235	RAV	0
Zhongzhi13_14540	PF00847	AP2 domain	0	252	26943	5.46	chr6		Swetha 09024	RAV	0
Zhongzhi13_14672	PF00847	AP2 domain	0	345	37678.6	5.63	chr6		Yuzhi11 22759	RAV	0
Zhongzhi13_14877	PF00847	AP2 domain	0	237	26892.8	5.38	chr6		Zhongzhi13 04659	RAV	0
Zhongzhi13_15272	PF00847	AP2 domain	0	255	28340.2	5.66	chr6		Mishuozhima 01370	RAV	0
Zhongzhi13_15274	PF00847	AP2 domain	0	163	17935.7	5.7	chr6		Zhongzhi13 01594	RAV	0
Zhongzhi13_13505	PF00847	AP2 domain	1	207	23104.2	8.93	chr6		Swetha 02076	RAV	0
Zhongzhi13_15273	PF00847	AP2 domain	1	239	26679.1	10.06	chr6		Yuzhi11 00672	RAV	0
Zhongzhi13_15539	PF00847	AP2 domain	1	251	28170.4	7.66	chr6		Swetha 02066	RAV	0
Zhongzhi13_14296	PF00847	AP2 domain	3	386	42686.4	9.67	chr6		Baizhima 18041	RAV	0
Zhongzhi13_15124	PF00847	AP2 domain	10	553	59576.8	6.12	chr6		Mishuozhima 17673	RAV	0
Mishuozhima_14540	PF00847	AP2 domain	0	291	32347.2	8.19	Chr6		Swetha 20410	RAV	0
Mishuozhima_14723	PF00847	AP2 domain	0	229	24983.9	4.66	Chr6		Yuzhi11 11075	RAV	0
Mishuozhima_14812	PF00847	AP2 domain	0	250	27156.2	5.31	Chr6		Zhongzhi13 16974	RAV	0
Mishuozhima_14976	PF00847	AP2 domain	1	207	23104.2	8.93	Chr6		Zhongzhi13 03050	DREB A-6	1
Mishuozhima_15587	PF00847	AP2 domain	3	386	42686.4	9.67	Chr6		Zhongzhi13_17646	DREB-A1	1
Mishuozhima_15589	PF00847	AP2 domain	0	239	26236	8.66	Chr6		Swetha 22765	DREB-A2	1
Mishuozhima_15591	PF00847	AP2 domain	0	254	28282.9	5.92	Chr6		Swetha_10826	DREB-A4	1
Mishuozhima_15802	PF00847	AP2 domain	0	209	23527.7	8.24	Chr6		Swetha_20564	DREB-A4	1
Mishuozhima_15803	PF00847	AP2 domain	0	252	26929	5.6	Chr6		Mishuozhima_12028	DREB-A4	1
Mishuozhima_15934	PF00847	AP2 domain	0	345	37678.6	5.63	Chr6		Swetha_01481	DREB--A4	1
Mishuozhima_16115	PF00847	AP2 domain	0	243	32748.4	5.6	Chr6		Mishuozhima 05384	DREB-A5	1
Mishuozhima_16334	PF00847	AP2 domain	7	561	61191.9	6.05	Chr6		Yuzhi11 02279	DREB-A5	1
Mishuozhima_16474	PF00847	AP2 domain	0	255	28340.2	5.66	Chr6		Baizhima 05558	DREB-A5	1
Mishuozhima_16475	PF00847	AP2 domain	1	239	26679.1	10.06	Chr6		Zhongzhi13 32012	DREB-A5	1
Mishuozhima_16476	PF00847	AP2 domain	0	163	17935.7	5.7	Chr6		Yuzhi11 06305	ERF-B1	1
Baizhima_14556	PF00847	AP2 domain	0	156	17788.4	9.57	Chr6		Swetha 36738	ERF-B1	1
Baizhima_14839	PF00847	AP2 domain	0	291	32347.2	8.19	Chr6		Zhongzhi13 30137	ERF-B1	1
Baizhima_15050	PF00847	AP2 domain	0	229	24983.9	4.66	Chr6		Swetha 09370	ERF-B1	1
Baizhima_15153	PF00847	AP2 domain	0	250	27125.2	5.31	Chr6		Swetha 26629	ERF-B1	1
Baizhima_15301	PF00847	AP2 domain	1	207	23104.2	8.93	Chr6		Yuzhi11 19862	ERF-B1	1
Baizhima_15884	PF00847	AP2 domain	3	386	42686.4	9.67	Chr6		Mishuozhima 25363	ERF-B2	1
Baizhima_15887	PF00847	AP2 domain	0	239	26236	8.66	Chr6		Yuzhi11 17733	ERF-B2	1
Baizhima_15889	PF00847	AP2 domain	0	254	28282.9	5.92	Chr6		Swetha 34339	ERF-B2	1
Baizhima_16098	PF00847	AP2 domain	0	209	23510.6	8.18	Chr6		Yuzhi11 25460	ERF-B2	1
Baizhima_16099	PF00847	AP2 domain	0	252	26943	5.46	Chr6		Zhongzhi13 01706	ERF-B2	1
Baizhima_16228	PF00847	AP2 domain	0	345	37678.6	5.63	Chr6		Baizhima 01712	ERF-B2	1
Baizhima_16403	PF00847	AP2 domain	0	243	27447.5	5.28	Chr6		Mishuozhima 01491	ERF-B2	1
Baizhima_16634	PF00847	AP2 domain	10	609	66645.5	7.03	Chr6		Baizhima 08744	ERF-B2	1
Baizhima_16736	PF00847	AP2 domain	0	255	28340.2	5.66	Chr6		Mishuozhima 08292	ERF-B2	1
Baizhima_16737	PF00847	AP2 domain	1	239	26679.1	10.06	Chr6		Swetha 05910	ERF-B2	1
Baizhima_16738	PF00847	AP2 domain	0	163	17935.7	5.7	Chr6		Yuzhi11 04212	ERF-B2	1
Baizhima_16991	PF00847	AP2 domain	1	251	28170.4	7.66	Chr6		Zhongzhi13 06381	ERF-B2	1
Swetha_22735	PF00847	AP2 domain	0	269	29743.9	6.72	Chr7		Yuzhi11 22530	ERF-B2	1
Swetha_22765	PF00847	AP2 domain	1	195	21568.1	6.17	Chr7		Zhongzhi13 15539	ERF-B2	1
Swetha_23066	PF00847	AP2 domain	1	258	29352.9	9.27	Chr7		Swetha 21844	ERF-B2	1
Swetha_23589	PF00847	AP2 domain	2	341	38158.2	5.89	Chr7		Mishuozhima 02486	ERF-B2	1
Swetha_23592	PF00847	AP2 domain	5	578	64115.5	6.07	Chr7		Baizhima 16991	ERF-B2	1
Swetha_23786	PF00847	AP2 domain	0	372	41407.9	4.67	Chr7		Baizhima 16737	ERF-B3	1
Swetha_23877	PF00847	AP2 domain	1	286	32074.7	8.89	Chr7		Swetha 04859	ERF-B3	1
Swetha_23881	PF00847	AP2 domain	0	215	23755.4	5.07	Chr7		Yuzhi11 10169	ERF-B3	1
Swetha_23957	PF00847	AP2 domain	0	277	31273.5	5.27	Chr7		Zhongzhi13 15273	ERF-B3	1
Swetha_24055	PF00847	AP2 domain	0	344	38720.5	6.16	Chr7		Mishuozhima 16475	ERF-B3	1
Yuzhi11_11075	PF00847	AP2 domain	0	352	39588.3	5.52	Chr7		Baizhima 02293	ERF-B3	1
Yuzhi11_11424	PF00847	AP2 domain	7	393	43114	8.61	Chr7		Swetha 03139	ERF-B3	1
Yuzhi11_11449	PF00847	AP2 domain	0	154	17553.2	4.83	Chr7		Yuzhi11 01228	ERF-B3	1
Yuzhi11_11470	PF00847	AP2 domain	5	482	58349.3	6.09	Chr7		Zhongzhi13 02429	ERF-B3	1
Yuzhi11_11606	PF00847	AP2 domain	0	372	41407.9	4.67	Chr7		Baizhima 02301	ERF-B3	1
Yuzhi11_11670	PF00847	AP2 domain	0	250	27584.2	7.67	Chr7		Mishuozhima 02131	ERF-B3	1
Yuzhi11_11671	PF00847	AP2 domain	0	266	29779.3	6.93	Chr7		Zhongzhi13 02437	ERF-B3	1
Yuzhi11_11672	PF00847	AP2 domain	0	215	23755.4	5.07	Chr7		Swetha 21486	ERF-B3	1
Yuzhi11_11741	PF00847	AP2 domain	0	349	39267.1	6.16	Chr7		Swetha 15360	ERF-B3	1
Zhongzhi13_16722	PF00847	AP2 domain	0	212	23430.2	5.53	chr7		Yuzhi11 12343	ERF-B3	1
Zhongzhi13_16974	PF00847	AP2 domain	0	352	39588.3	5.53	chr7		Swetha 25102	ERF-B3	1
Zhongzhi13_17360	PF00847	AP2 domain	0	199	22182.7	8.4	chr7		Mishuozhima 11521	ERF-B3	1
Zhongzhi13_17525	PF00847	AP2 domain	0	372	41407.9	4.67	chr7		Swetha 23877	ERF-B3	1
Zhongzhi13_17595	PF00847	AP2 domain	0	166	18638.3	7.76	chr7		Yuzhi11 09353	ERF-B3	1
Zhongzhi13_17596	PF00847	AP2 domain	0	266	29779.3	6.93	chr7		Baizhima 03242	ERF-B4	1
Zhongzhi13_17597	PF00847	AP2 domain	0	215	23755.4	5.07	chr7		Mishuozhima 04565	ERF-B4	1
Zhongzhi13_17725	PF00847	AP2 domain	0	344	38720.5	6.16	chr7		Zhongzhi13 20122	ERF-B4	1
Zhongzhi13_17646	PF00847	AP2 domain	1	277	31273.5	5.27	chr7		Yuzhi11 22408	ERF-B4	1
Zhongzhi13_17382	PF00847	AP2 domain	6	607	67482.2	6.4	chr7		Swetha 26615	ERF-B4	1
Mishuozhima_17441	PF00847	AP2 domain	0	212	23430.2	5.53	Chr7		Zhongzhi13 06780	ERF-B4	1
Mishuozhima_17673	PF00847	AP2 domain	0	352	39588.3	5.53	Chr7		Mishuozhima 08624	ERF-B4	1
Mishuozhima_18000	PF00847	AP2 domain	0	202	22439	7.64	Chr7		Yuzhi11 04520	ERF-B4	1
Mishuozhima_18017	PF00847	AP2 domain	7	607	67482.2	6.4	Chr7		Swetha 11545	ERF-B4	1
Mishuozhima_18161	PF00847	AP2 domain	0	372	41407.9	4.67	Chr7		Baizhima 09111	ERF-B4	1
Mishuozhima_18231	PF00847	AP2 domain	0	250	27584.2	7.67	Chr7		Baizhima 05229	ERF-B4	1
Mishuozhima_18232	PF00847	AP2 domain	0	266	29779.3	6.93	Chr7		Mishuozhima 05067	ERF-B4	1
Mishuozhima_18233	PF00847	AP2 domain	0	215	23755.4	5.07	Chr7		Yuzhi11 01909	ERF-B4	1
Mishuozhima_18276	PF00847	AP2 domain	0	203	22862.7	5.78	Chr7		Zhongzhi13 03306	ERF-B4	1
Mishuozhima_18331	PF00847	AP2 domain	0	349	39267.1	6.16	Chr7		Baizhima 22475	ERF-B4	1
Baizhima_17826	PF00847	AP2 domain	0	212	23430.2	5.53	Chr7		Mishuozhima 22086	ERF-B4	1
Baizhima_18041	PF00847	AP2 domain	0	352	39588.3	5.53	Chr7		Yuzhi11 15043	ERF-B4	1
Baizhima_18345	PF00847	AP2 domain	0	202	22439	7.64	Chr7		Zhongzhi13 22412	ERF-B4	1
Baizhima_18367	PF00847	AP2 domain	7	607	67482.2	6.4	Chr7		Swetha 29550	ERF-B4	1
Baizhima_18494	PF00847	AP2 domain	0	372	41407.9	4.67	Chr7		Yuzhi11 22967	ERF-B5	1
Baizhima_18557	PF00847	AP2 domain	0	250	27584.2	7.67	Chr7		Mishuozhima 01616	ERF-B6	1
Baizhima_18558	PF00847	AP2 domain	0	266	29779.3	6.93	Chr7		Baizhima 01822	ERF-B6	1
Baizhima_18559	PF00847	AP2 domain	0	215	23755.4	5.07	Chr7		Zhongzhi13 01852	ERF-B6	1
Baizhima_18591	PF00847	AP2 domain	0	203	22862.7	5.78	Chr7		Mishuozhima 08736	ERF-B6	1
Baizhima_18635	PF00847	AP2 domain	0	349	39267.1	6016	Chr7		Baizhima 09246	ERF-B6	1
Swetha_24518	PF00847	AP2 domain	0	297	32793.2	5.01	Chr8		Zhongzhi13 06937	ERF-B6	1
Swetha_24927	PF00847	AP2 domain	5	217	24761.5	9.69	Chr8		Baizhima 15301	ERF-B6	1
Swetha_25094	PF00847	AP2 domain	0	146	16529.5	7.79	Chr8		Mishuozhima 14976	ERF-B6	1
Swetha_25096	PF00847	AP2 domain	0	166	18553.5	5.98	Chr8		Yuzhi11 09048	ERF-B6	1
Swetha_25097	PF00847	AP2 domain	0	157	17661.8	6.18	Chr8		Zhongzhi13 13505	ERF-B6	1
Swetha_25102	PF00847	AP2 domain	1	170	19316.7	8.61	Chr8		Swetha 19667	ERF-B6	1
Swetha_25103	PF00847	AP2 domain	2	178	20052.9	9.85	Chr8		Baizhima 01854	ERF-B6	1
Swetha_26388	PF00847	AP2 domain	0	418	45545.4	6.03	Chr8		Yuzhi11 00773	ERF-B6	1
Swetha_26389	PF00847	AP2 domain	0	418	45545.4	6.03	Chr8		SIN 1010767	ERF-B6	1
Swetha_26615	PF00847	AP2 domain	1	255	27874.5	5.19	Chr8		Baizhima 03794	ERF-B6	1
Swetha_26629	PF00847	AP2 domain	1	382	42960.8	5.49	Chr8		Yuzhi11 04608	ERF-B6	1
Yuzhi11_12060	PF00847	AP2 domain	0	393	43793.4	5.07	Chr8		Zhongzhi13 06883	ERF-B6	1
Yuzhi11_12192	PF00847	AP2 domain	0	345	38675	4.55	Chr8		Swetha 11674	ERF-B6	1
Yuzhi11_12227	PF00847	AP2 domain	5	217	24761.5	9.69	Chr8		Swetha 11676	ERF-B6	1
Yuzhi11_12343	PF00847	AP2 domain	1	172	19409.1	9.54	Chr8		Swetha 23066	RAV	1
Yuzhi11_12372	PF00847	AP2 domain	0	243	27433.4	5.28	Chr8		Swetha 23589	AP2	2
Yuzhi11_13059	PF00847	AP2 domain	0	418	45545.4	6.03	Chr8		Yuzhi11 01813	DREB A-6	2
Yuzhi11_13843	PF00847	AP2 domain	2	570	60814.4	8.18	Chr8		Baizhima 11945	DREB-A2	2
Zhongzhi13_18090	PF00847	AP2 domain	0	367	40473.9	5.52	chr8		Mishuozhima 11662	DREB-A2	2
Zhongzhi13_18380	PF00847	AP2 domain	0	345	38675	4.55	chr8		Zhongzhi13 09719	DREB-A2	2
Zhongzhi13_18590	PF00847	AP2 domain	0	146	16529.5	7.79	chr8		Baizhima 01581	DREB-A3	2
Zhongzhi13_18592	PF00847	AP2 domain	0	166	18553.5	5.98	chr8		Mishuozhima 01345	DREB-A3	2
Zhongzhi13_18593	PF00847	AP2 domain	0	157	17661.8	6.18	chr8		Yuzhi11 00648	DREB-A3	2
Zhongzhi13_19932	PF00847	AP2 domain	0	418	45545.4	6.03	chr8		Zhongzhi13 01569	DREB-A3	2
Zhongzhi13_20133	PF00847	AP2 domain	0	260	29201.8	4.69	chr8		Swetha 04991	DREB-A3	2
Zhongzhi13_20134	PF00847	AP2 domain	0	270	29984.6	5.16	chr8		Zhongzhi13_10152	DREB-A4	2
Zhongzhi13_21210	PF00847	AP2 domain	0	278	30686	6.36	chr8		Swetha_17617	DREB-A5	2
Zhongzhi13_20122	PF00847	AP2 domain	1	255	27874.5	5.19	chr8		Baizhima 12047	ERF-B3	2
Zhongzhi13_18440	PF00847	AP2 domain	5	217	24761.5	9.69	chr8		Mishuozhima 03111	ERF-B3	2
Mishuozhima_18673	PF00847	AP2 domain	0	393	43793.4	5.07	Chr8		Zhongzhi13 09838	ERF-B3	2
Mishuozhima_18939	PF00847	AP2 domain	0	345	38675	4.55	Chr8		Swetha 25103	ERF-B3	2
Mishuozhima_18999	PF00847	AP2 domain	5	217	24761.5	9.69	Chr8		Yuzhi11 13843	ERF-B3	2
Mishuozhima_19102	PF00847	AP2 domain	0	146	16529.5	7.79	Chr8		Baizhima 11811	ERF-B3	2
Mishuozhima_19104	PF00847	AP2 domain	0	166	18553.5	5.98	Chr8		Zhongzhi13 09568	ERF-B3	2
Mishuozhima_19105	PF00847	AP2 domain	0	157	17661.8	6.18	Chr8		Swetha 11741	ERF-B6	2
Mishuozhima_20047	PF00847	AP2 domain	0	418	50846.3	6.23	Chr8		Yuzhi11 04663	ERF-B6	2
Mishuozhima_21086	PF00847	AP2 domain	0	278	30686	6.36	Chr8		Swetha 33068	AP2	3
Baizhima_19229	PF00847	AP2 domain	5	217	24761.5	9.69	Chr8		Baizhima_15884	DREB-B2	3
Baizhima_19354	PF00847	AP2 domain	0	146	16529.5	7.79	Chr8		Zhongzhi13_14296	DREB-B2	3
Baizhima_19356	PF00847	AP2 domain	0	166	18553.5	5.98	Chr8		Mishuozhima_15587	DREB-B2	3
Baizhima_20366	PF00847	AP2 domain	0	418	45545.4	6.03	Chr8		Swetha 02415	ERF-B6	3
Baizhima_21476	PF00847	AP2 domain	0	278	30686	6.36	Chr8		Yuzhi11 00959	AP2	4
Swetha_28226	PF00847	AP2 domain	0	227	24656.8	6.6	Chr9		Zhongzhi13 02194	AP2	4
Swetha_28399	PF00847	AP2 domain	14	934	103691	6.26	Chr9		Baizhima 06882	AP2	4
Swetha_28474	PF00847	AP2 domain	36	1980	220504	5.02	Chr9		Swetha_00824	DREB-A4	4
Swetha_28477	PF00847	AP2 domain	0	278	31052.7	6.52	Chr9		Swetha 11540	ERF-B4	4
Swetha_28613	PF00847	AP2 domain	8	466	51149.9	8.58	Chr9		Baizhima 09780	AP2	5
Swetha_28864	PF00847	AP2 domain	5	222	25256.3	9.35	Chr9		Mishuozhima 09280	AP2	5
Swetha_28866	PF00847	AP2 domain	6	281	31104.4	9.74	Chr9		Yuzhi11 05172	AP2	5
Swetha_29014	PF00847	AP2 domain	7	313	34703.6	7.79	Chr9		Zhongzhi13 07576	AP2	5
Swetha_29177	PF00847	AP2 domain	0	219	24562.5	5.42	Chr9		Yuzhi11 11470	AP2	5
Swetha_29550	PF00847	AP2 domain	1	377	40940.6	5.24	Chr9		Swetha 23592	AP2	5
Swetha_30858	PF00847	AP2 domain	7	646	71835.7	5.98	Chr9		Baizhima 05663	AP2	5
Swetha_30866	PF00847	AP2 domain	7	646	71835.7	5.98	Chr9		Mishuozhima 05483	AP2	5
Swetha_31543	PF00847	AP2 domain	5	383	43275.3	7.07	Chr9		Yuzhi11 02342	AP2	5
Swetha_31547	PF00847	AP2 domain	5	383	43275.3	7.07	Chr9		Zhongzhi13 03834	AP2	5
Yuzhi11_14103	PF00847	AP2 domain	0	222	24434.4	5.99	Chr9		Baizhima 19229	AP2	5
Yuzhi11_14166	PF00847	AP2 domain	0	222	24434.4	5.99	Chr9		Mishuozhima 18999	AP2	5
Yuzhi11_14286	PF00847	AP2 domain	6	283	32581.7	9.65	Chr9		Swetha 24927	AP2	5
Yuzhi11_14336	PF00847	AP2 domain	0	278	31052.7	6.52	Chr9		Yuzhi11 12227	AP2	5
Yuzhi11_14439	PF00847	AP2 domain	8	466	51149.9	8.58	Chr9		Zhongzhi13 18440	AP2	5
Yuzhi11_14632	PF00847	AP2 domain	5	222	25270.4	9.35	Chr9		Swetha 31547	AP2	5
Yuzhi11_14834	PF00847	AP2 domain	0	219	24544.4	5.42	Chr9		Yuzhi11 23062	AP2	5
Yuzhi11_15043	PF00847	AP2 domain	1	377	40970.7	5.24	Chr9		Swetha 31543	AP2	5
Yuzhi11_15086	PF00847	AP2 domain	0	322	35714.3	6.66	Chr9		Mishuozhima 23482	AP2	5
Yuzhi11_15749	PF00847	AP2 domain	7	646	71835.7	5.98	Chr9		Baizhima 23871	AP2	5
Yuzhi11_16046	PF00847	AP2 domain	0	229	24983.9	4.66	Chr9		Zhongzhi13 24026	AP2	5
Zhongzhi13_21545	PF00847	AP2 domain	0	278	31052.7	6.52	chr9		Mishuozhima 01934	AP2	5
Zhongzhi13_22112	PF00847	AP2 domain	0	219	24544.4	5.42	chr9		Yuzhi11 17013	AP2	5
Zhongzhi13_22498	PF00847	AP2 domain	0	322	35714.3	6.66	chr9		Baizhima 11916	DREB-A2	5
Zhongzhi13_24086	PF00847	AP2 domain	0	379	42289.1	4.66	chr9		Swetha_18147	DREB-A4	5
Zhongzhi13_22412	PF00847	AP2 domain	1	377	40970.7	5.24	chr9		Swetha 02245	ERF-B2	5
Zhongzhi13_21859	PF00847	AP2 domain	5	222	25270.4	9.35	chr9		Mishuozhima 01646	ERF-B6	5
Zhongzhi13_24026	PF00847	AP2 domain	5	383	43275.3	7.07	chr9		Mishuozhima 21609	SOLOIST	5
Zhongzhi13_21493	PF00847	AP2 domain	6	277	31811.2	8.84	chr9		Swetha 28864	SOLOIST	5
Zhongzhi13_23474	PF00847	AP2 domain	7	646	71835.7	5.98	chr9		Baizhima 21990	SOLOIST	5
Zhongzhi13_23742	PF00847	AP2 domain	7	559	62325.3	8.52	chr9		Yuzhi11 14632	SOLOIST	5
Zhongzhi13_21657	PF00847	AP2 domain	8	466	51149.9	8.58	chr9		Zhongzhi13 21859	SOLOIST	5
Mishuozhima_21198	PF00847	AP2 domain	0	222	24434.4	5.99	Chr9		Mishuozhima 30161	AP2	6
Mishuozhima_21323	PF00847	AP2 domain	6	277	31811.2	8.84	Chr9		Baizhima 30706	AP2	6
Mishuozhima_21378	PF00847	AP2 domain	0	278	31052.7	6.52	Chr9		Yuzhi11 21887	AP2	6
Mishuozhima_21482	PF00847	AP2 domain	8	466	51149.9	8.58	Chr9		Zhongzhi13 32148	AP2	6
Mishuozhima_21609	PF00847	AP2 domain	5	222	25256.3	9.35	Chr9		Zhongzhi13 17382	AP2	6
Mishuozhima_21812	PF00847	AP2 domain	0	219	24516.4	5.42	Chr9		Swetha 08528	AP2	6
Mishuozhima_22086	PF00847	AP2 domain	1	377	40970.7	5.24	Chr9		Zhongzhi13 04281	AP2	6
Mishuozhima_22144	PF00847	AP2 domain	0	322	35714.3	6.66	Chr9		Mishuozhima 05883	AP2	6
Mishuozhima_22993	PF00847	AP2 domain	7	646	71835.7	5.98	Chr9		Baizhima 06070	AP2	6
Mishuozhima_23246	PF00847	AP2 domain	0	157	17127.2	9.18	Chr9		Yuzhi11 02708	AP2	6
Mishuozhima_23248	PF00847	AP2 domain	7	559	62325.3	8.52	Chr9		Baizhima 10330	AP2	6
Mishuozhima_23482	PF00847	AP2 domain	5	383	43275.3	7.07	Chr9		Baizhima 29293	AP2	6
Mishuozhima_23541	PF00847	AP2 domain	0	379	42319.1	4.63	Chr9		Mishuozhima 28717	AP2	6
Baizhima_21615	PF00847	AP2 domain	0	222	24434.4	5.99	Chr9		Swetha 39000	AP2	6
Baizhima_21734	PF00847	AP2 domain	0	278	31052.7	6.52	Chr9		Zhongzhi13 30427	AP2	6
Baizhima_21990	PF00847	AP2 domain	5	222	25256.3	9.35	Chr9		Yuzhi11 13872	AP2	6
Baizhima_22183	PF00847	AP2 domain	0	219	24425.2	5.29	Chr9		Mishuozhima 30931	AP2	6
Baizhima_22475	PF00847	AP2 domain	1	377	40970.7	5.24	Chr9		Swetha 41771	AP2	6
Baizhima_23371	PF00847	AP2 domain	7	646	71835.7	5.98	Chr9		Zhongzhi13 33595	AP2	6
Baizhima_23619	PF00847	AP2 domain	0	157	17127.2	9.18	Chr9		Mishuozhima 21323	AP2/APD1	6
Baizhima_23621	PF00847	AP2 domain	7	559	62325.3	8.52	Chr9		Zhongzhi13 21493	AP2/APD1	6
Baizhima_23871	PF00847	AP2 domain	5	383	43275.3	7.07	Chr9		Baizhima 03395	AP2/APD1	6
Baizhima_23931	PF00847	AP2 domain	0	379	42319.1	4.63	Chr9		Yuzhi11 14286	AP2/APD1	6
Swetha_05159	PF00847	AP2 domain	8	697	76020.1	6.23	JPLX01000010.1		Swetha 28866	SOLOIST	6
Swetha_06472	PF00847	AP2 domain	0	225	24213.7	5.19	JPLX01000075.1		Swetha 40799	AP2	7
Swetha_05910	PF00847	AP2 domain	1	393	43582.2	4.89	JPLX01000105.1		Zhongzhi13 31963	AP2	7
Swetha_00306	PF00847	AP2 domain	0	260	29201.8	4.69	JPLX01000310.1		Mishuozhima 30005	AP2	7
Swetha_00307	PF00847	AP2 domain	0	270	29984.6	5.16	JPLX01000310.1		Baizhima 00238	AP2	7
Swetha_05110	PF00847	AP2 domain	0	212	23430.2	5.53	JPLX01000393.1		Yuzhi11 25422	AP2	7
Swetha_04990	PF00847	AP2 domain	0	241	26555	7.68	JPLX01000515.1		Baizhima 23371	AP2	7
Swetha_04991	PF00847	AP2 domain	2	436	47939	4.85	JPLX01000515.1		Mishuozhima 22993	AP2	7
Swetha_04095	PF00847	AP2 domain	0	174	19406.7	5.67	JPLX01000536.1		Yuzhi11 15749	AP2	7
Swetha_04100	PF00847	AP2 domain	0	169	18619.8	7.75	JPLX01000536.1		Swetha 30866	AP2	7
Swetha_05085	PF00847	AP2 domain	0	290	31605.7	10.02	JPLX01000568.1		Swetha 30858	AP2	7
Swetha_05899	PF00847	AP2 domain	0	243	25990.6	5.05	JPLX01001227.1		Zhongzhi13 23474	AP2	7
Swetha_03766	PF00847	AP2 domain	7	469	50462.2	6.4	JPLX01001919.1		Swetha 12618	AP2	7
Swetha_04806	PF00847	AP2 domain	0	350	39569.3	6.41	JPLX01002408.1		Baizhima 05820	AP2	7
Swetha_03929	PF00847	AP2 domain	0	405	45204.1	5.35	JPLX01003490.1		Mishuozhima 05634	AP2	7
Swetha_04254	PF00847	AP2 domain	0	278	30686	6.36	JPLX01004113.1		Zhongzhi13 03999	AP2	7
Swetha_04859	PF00847	AP2 domain	1	263	29409.3	9.89	JPLX01004966.1		Swetha 03766	AP2	7
Swetha_03899	PF00847	AP2 domain	0	105	11761.9	4.39	JPLX01005649.1		Yuzhi11 02483	AP2	7
Swetha_00119	PF00847	AP2 domain	0	320	35668.9	7.64	JPLX01006484.1		Mishuozhima 16334	AP2	7
Swetha_05853	PF00847	AP2 domain	0	130	14585.1	6.31	PLX01000215.1		Baizhima 18367	AP2	7
Swetha_05854	PF00847	AP2 domain	0	134	15112.9	9.21	PLX01000215.1		Mishuozhima 18017	AP2	7
Swetha_05855	PF00847	AP2 domain	0	141	15736.9	4.53	PLX01000215.1		Baizhima 08704	AP2	7
Yuzhi11_13872	PF00847	AP2 domain	6	411	45744.2	9.06	scaffold00008		Mishuozhima 08252	AP2	7
Yuzhi11_19341	PF00847	AP2 domain	0	198	na	na	scaffold00012		Yuzhi11 04173	AP2	7
Yuzhi11_22135	PF00847	AP2 domain	0	212	23430.2	5.53	scaffold00024		Swetha 10977	AP2	7
Yuzhi11_22396	PF00847	AP2 domain	0	270	29984.6	5.16	scaffold00032		Swetha 33069	AP2	7
Yuzhi11_22397	PF00847	AP2 domain	0	260	29201.8	4.69	scaffold00032		Zhongzhi13 25401	AP2	7
Yuzhi11_22408	PF00847	AP2 domain	1	252	27583.2	5.19	scaffold00032		Baizhima 25029	AP2	7
Yuzhi11_22530	PF00847	AP2 domain	1	251	33351	6.61	scaffold00034		Mishuozhima 24551	AP2	7
Yuzhi11_22734	PF00847	AP2 domain	0	211	23790.7	7.64	scaffold00042		Swetha 29014	AP2	7
Yuzhi11_22735	PF00847	AP2 domain	0	354	39305	4.65	scaffold00042		Zhongzhi13 33551	AP2	7
Yuzhi11_22759	PF00847	AP2 domain	0	374	40981.7	8.83	scaffold00042		Yuzhi11 11424	AP2	7
Yuzhi11_22839	PF00847	AP2 domain	0	390	42419.7	5.31	scaffold00051		Baizhima 31489	AP2	7
Yuzhi11_22952	PF00847	AP2 domain	0	297	32301.2	9.08	scaffold00053		Baizhima 23621	AP2	7
Yuzhi11_22967	PF00847	AP2 domain	1	300	32727.3	4.92	scaffold00053		Mishuozhima 23248	AP2	7
Yuzhi11_23062	PF00847	AP2 domain	5	383	43275.3	7.07	scaffold00080		Zhongzhi13 23742	AP2	7
Yuzhi11_23120	PF00847	AP2 domain	0	379	42289.1	4.66	scaffold00080		Swetha 18219	AP2	7
Yuzhi11_23269	PF00847	AP2 domain	0	248	na	na	scaffold00099		Swetha 12621	AP2	8
Zhongzhi13_33551	PF00847	AP2 domain	7	393	43114	8.61	scaffold00390		Swetha 21316	AP2	8
Swetha_41771	PF00847	AP2 domain	6	417	45897.3	8.67	scaffold00415		Swetha 41017	AP2	8
Zhongzhi13_33595	PF00847	AP2 domain	6	417	45897.3	8.67	scaffold00415		Baizhima 12573	AP2	8
Mishuozhima_30931	PF00847	AP2 domain	6	417	45897.3	8.67	scaffold00415		Zhongzhi13 10461	AP2	8
Baizhima_31489	PF00847	AP2 domain	7	381	41791.7	8.64	scaffold00415		Mishuozhima 12301	AP2	8
Yuzhi11_25993	PF00847	AP2 domain	0	420	46264.6	7.14	scaffold01242		Swetha 05159	AP2	8
Yuzhi11_24903	PF00847	AP2 domain	0	234	26063.1	5.25	scaffold0321		Zhongzhi13 06339	AP2	8
Yuzhi11_25422	PF00847	AP2 domain	7	592	65741.4	6.24	scaffold0494		Baizhima 04246	AP2	8
Yuzhi11_25460	PF00847	AP2 domain	1	391	43171.6	4.97	scaffold0513		Mishuozhima 21482	AP2	8
Baizhima_03787	PF00847	AP2 domain	0	290	31605.7	10.02	tarseq_10435_000001		Swetha 28613	AP2	8
Baizhima_03794	PF00847	AP2 domain	1	224	25307.8	8.48	tarseq_10435_000001		Yuzhi11 14439	AP2	8
Baizhima_03772	PF00847	AP2 domain	0	225	24213.7	5.19	tarseq_11097_000001		Zhongzhi13 21657	AP2	8
Mishuozhima_02700	PF00847	AP2 domain	0	350	39569.3	6.41	tarseq_11258_000001		Mishuozhima 12226	AP2	8
Mishuozhima_02680	PF00847	AP2 domain	0	290	31605.7	10.02	tarseq_13226_000001		Zhongzhi13 10370	AP2	8
Mishuozhima_02687	PF00847	AP2 domain	0	224	39569.3	6.41	tarseq_13226_000001		Baizhima 12504	AP2	8
Mishuozhima_03111	PF00847	AP2 domain	2	254	28500.9	4.59	tarseq_13632_000001		Yuzhi11 06982	AP2	8
Mishuozhima_00166	PF00847	AP2 domain	0	156	17788.4	9.57	tarseq_13733_000001		Swetha 16019	AP2	8
Baizhima_06882	PF00847	AP2 domain	4	296	33055	8.78	tarseq_14487_000002		Swetha 16020	AP2	8
Mishuozhima_02533	PF00847	AP2 domain	0	272	30794.5	5.16	tarseq_1475_000001		Yuzhi11 21770	AP2	8
Mishuozhima_02534	PF00847	AP2 domain	0	144	16157.1	10.13	tarseq_1475_000001		Zhongzhi13 32014	AP2	8
Mishuozhima_02564	PF00847	AP2 domain	0	233	25334.6	10.24	tarseq_1475_000001		Swetha 40862	AP2	8
Baizhima_03230	PF00847	AP2 domain	0	270	29984.6	5.16	tarseq_1595_000001		Mishuozhima 30032	AP2	8
Baizhima_03231	PF00847	AP2 domain	0	260	29201.8	4.69	tarseq_1595_000001		Baizhima 30581	AP2	8
Baizhima_03242	PF00847	AP2 domain	1	255	27874.5	5.19	tarseq_1595_000001		Swetha 16136	AP2	9
Baizhima_03395	PF00847	AP2 domain	6	277	31735.1	8.84	tarseq_1807_000001		Yuzhi11 08258	AP2	9
Baizhima_07378	PF00847	AP2 domain	0	238	26144	5.5	tarseq_18136_000002		Baizhima 14285	AP2	9
Baizhima_00238	PF00847	AP2 domain	7	592	65799.5	6.17	tarseq_2134_000001		Mishuozhima 13998	AP2	9
Baizhima_07499	PF00847	AP2 domain	0	297	32301.2	9.08	tarseq_2706_000002		Mishuozhima 25500	ERF-B5	9
Mishuozhima_02486	PF00847	AP2 domain	1	251	28170.4	7.66	tarseq_2896_000001		Baizhima 16634	AP2	10
Baizhima_10330	PF00847	AP2 domain	6	388	43097.8	5.67	tarseq_3037_000003		Yuzhi11 10025	AP2	10
Mishuozhima_03229	PF00847	AP2 domain	0	211	23253.8	5.47	tarseq_3828_000001		Zhongzhi13 15124	AP2	10
Baizhima_04246	PF00847	AP2 domain	8	466	51149.9	8.58	tarseq_5161_000001		Swetha 18222	AP2	10
Mishuozhima_04393	PF00847	AP2 domain	0	320	35668.9	7.64	tarseq_5470_000002		Swetha 07942	AP2	11
Baizhima_07127	PF00847	AP2 domain	0	175	19591.8	6.35	tarseq_5753_000002		Swetha 02461	ERF-B6	11
Baizhima_03467	PF00847	AP2 domain	0	211	23790.7	7.64	tarseq_6594_000001		Baizhima 01880	AP2	12
Baizhima_03468	PF00847	AP2 domain	0	362	40153.8	4.57	tarseq_6594_000001		Mishuozhima 01681	AP2	12
Baizhima_06848	PF00847	AP2 domain	0	345	38675	4.55	tarseq_6695_000002		Swetha 02512	AP2	12
Baizhima_04040	PF00847	AP2 domain	0	405	45204.1	5.35	tarseq_6782_000001		Yuzhi11 00808	AP2	12
Mishuozhima_04553	PF00847	AP2 domain	0	270	29984.6	5.16	tarseq_9192_000002		Zhongzhi13 01920	AP2	12
Mishuozhima_04554	PF00847	AP2 domain	0	260	29201.8	4.69	tarseq_9192_000002		Zhongzhi13 12386	AP2	12
Mishuozhima_04565	PF00847	AP2 domain	1	255	27874.5	5.19	tarseq_9192_000002		Swetha 28399	SOLOIST	14
Mishuozhima_02619	PF00847	AP2 domain	0	224	24735.5	4.9	tarseq_935_000001		Yuzhi11 07044	AP2	16
Baizhima_04674	PF00847	AP2 domain	0	252	27591.2	5.59	tarseq_9595_000002		Swetha 02835	AP2	20
Baizhima_00193	PF00847	AP2 domain	0	350	39569.3	6.41	tarseq_9853_000001		Swetha 28474	ERF-B6	36

## Sheet: WRKY_class
SI-2A Protein parametrs and genomic location of WRKY genes in sesame pan-genome										SI-2B Sub-family wise classification of individual WRKY genes and intron number				SI-2C Total intron count as per genome and sub-family of WRKY genes				SI-2D Exon size and count as per genome and sub-family of WRKY genes
WRKY_Gene	Pfam_id	Domain	Intron	location	length	mol.wt	pI			Gene	WRKY_Class	Intron_number		Genome	Class	Total intron Count		Genome	Exon_size	Count
Swetha_00675	PF03106	WRKY domain	2	Chr1	334	36078.9	9.56			Baizhima_06492	T1	5		Baizhima	T1	55		Baizhima	1-50bp	4
Swetha_00744	PF03106	WRKY domain	3	Chr1	605	67557.7	9.2			Baizhima_06844	T1	3		Mishouzhima	T1	60		Baizhima	51-100bp	23
Swetha_00918	PF03106	WRKY domain	2	Chr1	184	20779	6.07			Baizhima_10878	T1	3		Swetha	T1	100		Baizhima	101-200bp	116
Swetha_02485	PF03106	WRKY domain	5	Chr1	336	37300.9	8.15			Baizhima_12604	T1	4		Yuzhi_11	T1	55		Baizhima	201-400bp	68
Swetha_03115	PF03106	WRKY domain	2	Chr1	165	19227.3	9.22			Baizhima_16315	T1	4		Zhongzhi_13	T1	55		Baizhima	401-600bp	54
Swetha_03474	PF03106	WRKY domain	4	Chr1	544	60678.6	8.68			Baizhima_17686	T1	5		Baizhima	T2A	7		Baizhima	601-1000bp	37
Swetha_03532	PF03106	WRKY domain	2	Chr1	279	30786	4.58			Baizhima_18023	T1	4		Mishouzhima	T2A	11		Baizhima	1001-2000bp	2
Mishuozhima_00319	PF03106	WRKY domain	2	Chr1	334	36078.9	9.56			Baizhima_23935	T1	3		Swetha	T2A	12		Mishouzhima	1-50bp	6
Mishuozhima_01183	PF03106	WRKY domain	2	Chr1	348	39433.7	5.71			Baizhima_27200	T1	4		Yuzhi_11	T2A	7		Mishouzhima	51-100bp	23
Mishuozhima_01662	PF03106	WRKY domain	3	Chr1	296	32828.9	8.67			Baizhima_27443	T1	4		Zhongzhi_13	T2A	9		Mishouzhima	101-200bp	120
Mishuozhima_02367	PF03106	WRKY domain	3	Chr1	312	34872.6	6.26			Baizhima_27900	T1	3		Baizhima	T2B	50		Mishouzhima	201-400bp	62
Mishuozhima_02409	PF03106	WRKY domain	2	Chr1	350	39247.6	4.99			Baizhima_28580	T1	5		Mishouzhima	T2B	50		Mishouzhima	401-600bp	55
Mishuozhima_00361	PF03106	WRKY domain	2	chr1	255	28191.8	8.81			Baizhima_28619	T1	4		Swetha	T2B	79		Mishouzhima	601-1000bp	38
Mishuozhima_00366	PF03106	WRKY domain	2	chr1	255	28098.9	9.13			Baizhima_29801	T1	4		Yuzhi_11	T2B	48		Mishouzhima	1001-2000bp	2
Mishuozhima_00455	PF03106	WRKY domain	2	chr1	184	20779	6.07			Mishuozhima_03045	T1	4		Zhongzhi_13	T2B	48		Swetha	1-50bp	12
Mishuozhima_02108	PF03106	WRKY domain	2	chr1	165	19227.3	9.22			Mishuozhima_03451	T1	4		Baizhima	T2C	56		Swetha	51-100bp	60
SIN_1021618	PF03106	WRKY domain	3	Chr1	268	29501.4	8.92			Mishuozhima_06323	T1	5		Mishouzhima	T2C	56		Swetha	101-200bp	177
SIN_1021622	PF03106	WRKY domain	2	Chr1	255	28191.8	8.81			Mishuozhima_10568	T1	3		Swetha	T2C	90		Swetha	201-400bp	93
Zhongzhi13_00117	PF03106	WRKY domain	2	Chr1	334	36050.9	9.54			Mishuozhima_12424	T1	4		Yuzhi_11	T2C	57		Swetha	401-600bp	55
Zhongzhi13_00291	PF03106	WRKY domain	2	Chr1	184	20779	6.07			Mishuozhima_15903	T1	1		Zhongzhi_13	T2C	61		Swetha	601-1000bp	42
Zhongzhi13_01348	PF03106	WRKY domain	2	Chr1	348	39433.7	5.71			Mishuozhima_16023	T1	9		Baizhima	T2D	18		Swetha	1001-2000bp	4
Zhongzhi13_01901	PF03106	WRKY domain	3	Chr1	296	32828.9	8.67			Mishuozhima_18943	T1	3		Mishouzhima	T2D	19		Yuzhi	1-50bp	4
Zhongzhi13_02413	PF03106	WRKY domain	2	Chr1	165	19227.3	9.22			Mishuozhima_23545	T1	3		Swetha	T2D	28		Yuzhi	51-100bp	21
Zhongzhi13_02671	PF03106	WRKY domain	3	Chr1	312	34872.6	6.26			Mishuozhima_26608	T1	4		Yuzhi_11	T2D	17		Yuzhi	101-200bp	114
Zhongzhi13_02714	PF03106	WRKY domain	2	Chr1	350	39248.6	5.05			Mishuozhima_26841	T1	4		Zhongzhi_13	T2D	19		Yuzhi	201-400bp	62
Yuzhi11_00107	PF03106	WRKY domain	2	chr1	334	36050.9	9.54			Mishuozhima_27258	T1	3		Baizhima	T2E	18		Yuzhi	401-600bp	51
Yuzhi11_00789	PF03106	WRKY domain	3	chr1	296	32828.9	8.67			Mishuozhima_28009	T1	5		Mishouzhima	T2E	18		Yuzhi	601-1000bp	35
Yuzhi11_01215	PF03106	WRKY domain	2	chr1	165	19227.3	9.22			Mishuozhima_28079	T1	4		Swetha	T2E	33		Yuzhi	1001-2000bp	2
Yuzhi11_01468	PF03106	WRKY domain	3	chr1	312	34872.6	6.26			Mishuozhima_29258	T1	4		Yuzhi_11	T2E	17		Zhongzhi	1-50bp	6
Yuzhi11_01510	PF03106	WRKY domain	2	chr1	350	39262.6	5.05			Swetha_04277	T1	4		Zhongzhi_13	T2E	15		Zhongzhi	51-100bp	22
Baizhima_00523	PF03106	WRKY domain	2	chr1	334	36078.9	9.56			Swetha_06379	T1	4		Baizhima	T3	17		Zhongzhi	101-200bp	114
Baizhima_01413	PF03106	WRKY domain	2	chr1	348	39433.7	5.71			Swetha_06502	T1	4		Mishouzhima	T3	17		Zhongzhi	201-400bp	64
Baizhima_01861	PF03106	WRKY domain	3	chr1	296	32828.9	8.67			Swetha_09150	T1	6		Swetha	T3	13		Zhongzhi	401-600bp	53
Baizhima_02278	PF03106	WRKY domain	2	chr1	165	19227.3	9.22			Swetha_09155	T1	9		Yuzhi_11	T3	15		Zhongzhi	601-1000bp	36
Baizhima_02538	PF03106	WRKY domain	3	chr1	312	34872.6	6.26			Swetha_13727	T1	3		Zhongzhi_13	T3	14		Zhongzhi	1001-2000bp	2
Baizhima_00677	PF03106	WRKY domain	2	chr1	184	20779	6.07			Swetha_16173	T1	4
Swetha_34424	PF03106	WRKY domain	4	Chr10	370	41348.1	5.7			Swetha_16175	T1	4
Mishuozhima_23827	PF03106	WRKY domain	4	Chr10	501	55701.9	6.12			Swetha_16214	T1	5
Mishuozhima_25401	PF03106	WRKY domain	2	Chr10	369	41394	5.69			Swetha_20696	T1	4
Zhongzhi13_24455	PF03106	WRKY domain	4	Chr10	501	55701.9	6.12			Swetha_20702	T1	1
Zhongzhi13_26477	PF03106	WRKY domain	2	Chr10	367					Swetha_20852	T1	4
Yuzhi11_16521	PF03106	WRKY domain	4	chr10	501	55701.9	6.12			Swetha_23040	T1	4
Yuzhi11_17788	PF03106	WRKY domain	1	chr10	369	41394	5.69			Swetha_24865	T1	3
Baizhima_24252	PF03106	WRKY domain	4	chr10	501	55701.9	6.12			Swetha_24868	T1	17
Baizhima_25943	PF03106	WRKY domain	2	chr10	369	41424.1	5.69			Swetha_36105	T1	4
Swetha_34609	PF03106	WRKY domain	1	Chr11	215	24451.3	5.38			Swetha_37006	T1	3
Swetha_34662	PF03106	WRKY domain	3	Chr11	355	39671.9	9.12			Swetha_37939	T1	9
Swetha_36105	PF03106	WRKY domain	4	Chr11	396	43622.9	9.41			Swetha_38042	T1	4
Swetha_36198	PF03106	WRKY domain	11	Chr11	1141	125839	8.41			Swetha_39685	T1	4
Mishuozhima_26608	PF03106	WRKY domain	4	Chr11	396	43622.9	9.41			Yuzhi11_03004	T1	5
Mishuozhima_25520	PF03106	WRKY domain	2	chr11	352	38811.8	5.5			Yuzhi11_05885	T1	3
Mishuozhima_25659	PF03106	WRKY domain	2	chr11	151	17231.3	6.23			Yuzhi11_07075	T1	4
Mishuozhima_26690	PF03106	WRKY domain	11	chr11	1141	125911	8.49			Yuzhi11_07110	T1	4
Mishuozhima_26841	PF03106	WRKY domain	4	chr11	526	58184.5	5.79			Yuzhi11_09615	T1	1
Zhongzhi13_26627	PF03106	WRKY domain	1	Chr11	201	22752.3	5.13			Yuzhi11_09724	T1	4
Zhongzhi13_26659	PF03106	WRKY domain	1	Chr11	315	34413.7	4.86			Yuzhi11_11054	T1	4
Zhongzhi13_26827	PF03106	WRKY domain	2	Chr11	151	17231.3	6.23			Yuzhi11_12196	T1	3
Zhongzhi13_28050	PF03106	WRKY domain	4	Chr11	405	44631.2	9.53			Yuzhi11_18904	T1	4
Zhongzhi13_28134	PF03106	WRKY domain	11	Chr11	1141	125939	8.49			Yuzhi11_19160	T1	4
Zhongzhi13_28295	PF03106	WRKY domain	4	Chr11	526	58184.5	5.79			Yuzhi11_19706	T1	3
Zhongzhi13_28339	PF03106	WRKY domain	2	Chr11	327	36715	6.43			Yuzhi11_20285	T1	5
Yuzhi11_17922	PF03106	WRKY domain	1	chr11	201	22752.3	5.13			Yuzhi11_20376	T1	4
Yuzhi11_17950	PF03106	WRKY domain	2	chr11	352	38763.8	5.5			Yuzhi11_21059	T1	4
Yuzhi11_18013	PF03106	WRKY domain	2	chr11	151	17231.3	6.23			Yuzhi11_23124	T1	3
Yuzhi11_18862	PF03106	WRKY domain	2	chr11	235	26667.2	8.55			Zhongzhi13_04758	T1	5
Yuzhi11_19004	PF03106	WRKY domain	11	chr11	1141	125911	8.49			Zhongzhi13_08421	T1	3
Yuzhi11_19160	PF03106	WRKY domain	4	chr11	526	58200.5	5.79			Zhongzhi13_10493	T1	4
Yuzhi11_19205	PF03106	WRKY domain	2	chr11	327	36715	6.43			Zhongzhi13_10532	T1	4
Baizhima_27200	PF03106	WRKY domain	4	chr11	396	43622.9	9.41			Zhongzhi13_14642	T1	1
Baizhima_26060	PF03106	WRKY domain	2	chr11	352	38763.8	5.5			Zhongzhi13_14768	T1	4
Baizhima_26207	PF03106	WRKY domain	2	chr11	151	17231.3	6.23			Zhongzhi13_16955	T1	4
Baizhima_27282	PF03106	WRKY domain	11	chr11	1141	125911	8.49			Zhongzhi13_18384	T1	3
Baizhima_27443	PF03106	WRKY domain	4	chr11	526	58120.4	5.78			Zhongzhi13_24090	T1	3
Baizhima_27487	PF03106	WRKY domain	2	chr11	327	36685	6.43			Zhongzhi13_28050	T1	4
Swetha_36571	PF03106	WRKY domain	5	Chr12	675	71483.4	6.01			Zhongzhi13_28295	T1	4
Swetha_37006	PF03106	WRKY domain	3	Chr12	626	69677.1	8.28			Zhongzhi13_28798	T1	3
Swetha_37469	PF03106	WRKY domain	9	Chr12	610	67135	6.29			Zhongzhi13_29637	T1	5
Swetha_37873	PF03106	WRKY domain	5	Chr12	478	52289.5	5.86			Zhongzhi13_29729	T1	4
Swetha_37939	PF03106	WRKY domain	9	Chr12	873	94948.2	6.25			Zhongzhi13_31089	T1	4
Swetha_38042	PF03106	WRKY domain	4	Chr12	723	78071	6.19			Baizhima_01861	T2A	3
Swetha_38328	PF03106	WRKY domain	10	Chr12	797	88681.8	7.84			Baizhima_15045	T2A	4
Swetha_38333	PF03106	WRKY domain	5	Chr12	533	57433	6.29			Mishuozhima_00361	T2A	2
Swetha_38725	PF03106	WRKY domain	2	Chr12	302	33938.4	5.63			Mishuozhima_00366	T2A	2
Swetha_38738	PF03106	WRKY domain	2	Chr12	261	29565.8	5.29			Mishuozhima_01662	T2A	3
Swetha_38977	PF03106	WRKY domain	2	Chr12	462	49635.5	5.38			Mishuozhima_14718	T2A	4
Mishuozhima_26928	PF03106	WRKY domain	4	Chr12	590	62856.4	6.08			SIN_1021622	T2A	2
Mishuozhima_27258	PF03106	WRKY domain	3	Chr12	626	69677.1	8.28			Swetha_00744	T2A	3
Mishuozhima_27650	PF03106	WRKY domain	2	Chr12	341	38157.4	6.83			Swetha_02485	T2A	5
Mishuozhima_28009	PF03106	WRKY domain	5	Chr12	584	63040.4	6.52			Swetha_19273	T2A	4
Mishuozhima_28079	PF03106	WRKY domain	4	Chr12	723	78070	6.13			Yuzhi11_00789	T2A	3
Mishuozhima_28270	PF03106	WRKY domain	5	Chr12	573	61811	6.44			Yuzhi11_16041	T2A	4
Mishuozhima_28532	PF03106	WRKY domain	2	Chr12	302	33938.4	5.63			Zhongzhi13_01901	T2A	3
Mishuozhima_28699	PF03106	WRKY domain	2	Chr12	462	49635.5	5.38			Zhongzhi13_13210	T2A	4
Mishuozhima_27599	PF03106	WRKY domain	2	chr12	273	29466.5	5.68			Baizhima_07781	T2B	4
Mishuozhima_28573	PF03106	WRKY domain	2	chr12	300	33916.3	6.24			Baizhima_10164	T2B	2
Zhongzhi13_28437	PF03106	WRKY domain	4	Chr12	590	62856.4	6.08			Baizhima_18830	T2B	2
Zhongzhi13_28798	PF03106	WRKY domain	3	Chr12	626	69677.1	8.28			Baizhima_20032	T2B	5
Zhongzhi13_29190	PF03106	WRKY domain	3	Chr12	267	28431.6	5.15			Baizhima_20170	T2B	3
Zhongzhi13_29244	PF03106	WRKY domain	2	Chr12	341	38157.4	6.83			Baizhima_20694	T2B	3
Zhongzhi13_29584	PF03106	WRKY domain	4	Chr12	397	43056.2	7.21			Baizhima_21014	T2B	4
Zhongzhi13_29637	PF03106	WRKY domain	5	Chr12	584	63040.4	6.52			Baizhima_23876	T2B	3
Zhongzhi13_29729	PF03106	WRKY domain	4	Chr12	723	78070	6.13			Baizhima_24252	T2B	4
Zhongzhi13_29935	PF03106	WRKY domain	5	Chr12	573	61811	6.44			Baizhima_27586	T2B	4
Zhongzhi13_30232	PF03106	WRKY domain	2	Chr12	302	33938.4	5.63			Baizhima_28528	T2B	5
Zhongzhi13_30289	PF03106	WRKY domain	2	Chr12	300	33823.3	6.3			Baizhima_28813	T2B	5
Zhongzhi13_30409	PF03106	WRKY domain	2	Chr12	462	49635.5	5.38			Baizhima_29275	T2B	2
Yuzhi11_19438	PF03106	WRKY domain	4	chr12	590	62856.4	6.08			Baizhima_29373	T2B	4
Yuzhi11_19706	PF03106	WRKY domain	4	chr12	626	69677.1	8.28			Mishuozhima_02409	T2B	2
Yuzhi11_19933	PF03106	WRKY domain	3	chr12	341	38157.4	6.83			Mishuozhima_02432	T2B	5
Yuzhi11_20249	PF03106	WRKY domain	2	chr12	397	43056.2	7.21			Mishuozhima_02666	T2B	5
Yuzhi11_20285	PF03106	WRKY domain	4	chr12	584	63040.4	6.52			Mishuozhima_07342	T2B	4
Yuzhi11_20376	PF03106	WRKY domain	5	chr12	723	78070	6.13			Mishuozhima_18548	T2B	2
Yuzhi11_19897	PF03106	WRKY domain	2	chr12	273	29496.5	5.58			Mishuozhima_19837	T2B	3
Baizhima_27586	PF03106	WRKY domain	4	chr12	590	62856.4	6.08			Mishuozhima_20370	T2B	3
Baizhima_27900	PF03106	WRKY domain	3	chr12	626	69677.1	8.28			Mishuozhima_20687	T2B	4
Baizhima_28247	PF03106	WRKY domain	2	chr12	341	38157.4	6.83			Mishuozhima_23487	T2B	3
Baizhima_28528	PF03106	WRKY domain	5	chr12	478	52492.1	6.07			Mishuozhima_23827	T2B	4
Baizhima_28580	PF03106	WRKY domain	5	chr12	584	63040.4	6.52			Mishuozhima_26928	T2B	4
Baizhima_28619	PF03106	WRKY domain	4	chr12	723	78070	6.13			Mishuozhima_28270	T2B	5
Baizhima_28813	PF03106	WRKY domain	5	chr12	573	61811	6.44			Mishuozhima_28699	T2B	2
Baizhima_29097	PF03106	WRKY domain	2	chr12	302	33938.4	5.63			Mishuozhima_28814	T2B	4
Baizhima_29275	PF03106	WRKY domain	2	chr12	462	49635.5	5.38			Swetha_03532	T2B	2
Baizhima_28206	PF03106	WRKY domain	2	chr12	273	29496.5	5.58			Swetha_06527	T2B	2
Baizhima_29151	PF03106	WRKY domain	2	chr12	300	33916.3	6.24			Swetha_09830	T2B	4
Swetha_39148	PF03106	WRKY domain	7	Chr13	675	72723.6	7.49			Swetha_24326	T2B	2
Swetha_39149	PF03106	WRKY domain	4	Chr13	462	49561.2	6.95			Swetha_25903	T2B	5
Swetha_39685	PF03106	WRKY domain	4	Chr13	501	54619.6	5.24			Swetha_25904	T2B	4
Swetha_40212	PF03106	WRKY domain	2	Chr13	315	35521.3	7.75			Swetha_26111	T2B	3
Swetha_40878	PF03106	WRKY domain	4	Chr13	448	50694.4	9.34			Swetha_26113	T2B	3
Swetha_41219	PF03106	WRKY domain	1	Chr13	161	18050.1	5.52			Swetha_26862	T2B	3
Mishuozhima_28814	PF03106	WRKY domain	4	Chr13	528	57317.8	7.23			Swetha_26866	T2B	6
Mishuozhima_29258	PF03106	WRKY domain	4	Chr13	728	78057.7	5.93			Swetha_27391	T2B	4
Mishuozhima_29606	PF03106	WRKY domain	2	Chr13	315	35547.3	7.74			Swetha_31558	T2B	3
Mishuozhima_30045	PF03106	WRKY domain	6	Chr13	553	62509.8	9.06			Swetha_36571	T2B	5
Mishuozhima_30302	PF03106	WRKY domain	2	chr13	235	26667.2	8.55			Swetha_37873	T2B	5
Zhongzhi13_30549	PF03106	WRKY domain	4	Chr13	528	57317.8	7.23			Swetha_38328	T2B	10
Zhongzhi13_31089	PF03106	WRKY domain	4	Chr13	728	78031.7	5.96			Swetha_38333	T2B	5
Zhongzhi13_31495	PF03106	WRKY domain	2	Chr13	315	35547.3	7.74			Swetha_38977	T2B	2
Zhongzhi13_32025	PF03106	WRKY domain	6	Chr13	553	62482.8	9.06			Swetha_39148	T2B	7
Zhongzhi13_32303	PF03106	WRKY domain	2	Chr13	235	26667.2	8.55			Swetha_39149	T2B	4
Yuzhi11_21059	PF03106	WRKY domain	3	chr13	728	78031.7	5.96			Yuzhi11_01510	T2B	2
Yuzhi11_21397	PF03106	WRKY domain	4	chr13	315	35547.3	7.74			Yuzhi11_03305	T2B	4
Yuzhi11_21782	PF03106	WRKY domain	2	chr13	553	62509.8	9.06			Yuzhi11_03598	T2B	4
Baizhima_29373	PF03106	WRKY domain	4	chr13	533	57835.3	7.23			Yuzhi11_11924	T2B	2
Baizhima_29801	PF03106	WRKY domain	4	chr13	728	78031.7	5.96			Yuzhi11_12704	T2B	5
Baizhima_30593	PF03106	WRKY domain	6	chr13	553	62509.8	9.06			Yuzhi11_12853	T2B	2
Baizhima_30863	PF03106	WRKY domain	2	chr13	235	26667.2	8.55			Yuzhi11_13325	T2B	3
Swetha_09138	PF03106	WRKY domain	4	Chr2	334	NA	NA			Yuzhi11_13890	T2B	2
Swetha_09150	PF03106	WRKY domain	6	Chr2	542	60304.6	6.77			Yuzhi11_16521	T2B	4
Swetha_09155	PF03106	WRKY domain	9	Chr2	718	78191	6.65			Yuzhi11_19438	T2B	4
Swetha_09460	PF03106	WRKY domain	1	Chr2	181	21022.2	9.07			Yuzhi11_20249	T2B	4
Mishuozhima_06323	PF03106	WRKY domain	5	Chr2	574	63080.4	6.98			Yuzhi11_23067	T2B	3
Mishuozhima_05387	PF03106	WRKY domain	2	chr2	330	35943.4	9.19			Yuzhi11_23561	T2B	5
Mishuozhima_06538	PF03106	WRKY domain	1	chr2	181	21022.2	9.07			Yuzhi11_24840	T2B	4
Zhongzhi13_03714	PF03106	WRKY domain	3	Chr2	257	27920.5	9.47			Zhongzhi13_02714	T2B	2
Zhongzhi13_04749	PF03106	WRKY domain	3	Chr2	376	40062.4	7.59			Zhongzhi13_05263	T2B	4
Zhongzhi13_04758	PF03106	WRKY domain	5	Chr2	574	63128.5	6.98			Zhongzhi13_17943	T2B	1
Zhongzhi13_04978	PF03106	WRKY domain	1	Chr2	181	21022.2	9.07			Zhongzhi13_19532	T2B	5
Yuzhi11_03004	PF03106	WRKY domain	5	chr2	574	63080.4	6.98			Zhongzhi13_19696	T2B	3
Yuzhi11_02269	PF03106	WRKY domain	2	chr2	252	27001.1	8.21			Zhongzhi13_20329	T2B	3
Yuzhi11_02995	PF03106	WRKY domain	2	chr2	365	39207.5	7.59			Zhongzhi13_20690	T2B	4
Baizhima_06492	PF03106	WRKY domain	5	chr2	574	63080.4	6.98			Zhongzhi13_24031	T2B	3
Baizhima_05559	PF03106	WRKY domain	2	chr2	330	35943.4	9.19			Zhongzhi13_24455	T2B	4
Baizhima_06483	PF03106	WRKY domain	3	chr2	365	39207.5	7.59			Zhongzhi13_28437	T2B	4
Swetha_09527	PF03106	WRKY domain	2	Chr3	345	38733.2	6.02			Zhongzhi13_29584	T2B	4
Swetha_09533	PF03106	WRKY domain	14	Chr3	731	79632.8	5.39			Zhongzhi13_29935	T2B	5
Swetha_09830	PF03106	WRKY domain	4	Chr3	602	64749.7	5.79			Zhongzhi13_30409	T2B	2
Swetha_11646	PF03106	WRKY domain	3	Chr3	308	34416.9	9.3			Zhongzhi13_30549	T2B	4
Swetha_12711	PF03106	WRKY domain	1	Chr3	269	29300.2	9.95			Baizhima_00677	T2C	2
Swetha_12712	PF03106	WRKY domain	2	Chr3	147	16142.5	9.78			Baizhima_02278	T2C	2
Mishuozhima_07137	PF03106	WRKY domain	2	Chr3	372	41478.3	6.17			Baizhima_04778	T2C	2
Mishuozhima_07342	PF03106	WRKY domain	4	Chr3	602	64693.6	5.62			Baizhima_06483	T2C	3
Mishuozhima_08695	PF03106	WRKY domain	3	Chr3	308	34416.9	9.3			Baizhima_06773	T2C	1
Mishuozhima_09322	PF03106	WRKY domain	2	Chr3	335	36527.4	9.57			Baizhima_07573	T2C	2
Zhongzhi13_05039	PF03106	WRKY domain	2	Chr3	372	41478.3	6.17			Baizhima_09190	T2C	3
Zhongzhi13_05263	PF03106	WRKY domain	4	Chr3	602	64693.6	5.62			Baizhima_10914	T2C	2
Zhongzhi13_06862	PF03106	WRKY domain	3	Chr3	308	34416.9	9.3			Baizhima_11864	T2C	2
Zhongzhi13_07633	PF03106	WRKY domain	2	Chr3	335	36515.3	9.57			Baizhima_15231	T2C	2
Yuzhi11_03421	PF03106	WRKY domain	2	chr3	372	41478.3	6.17			Baizhima_17053	T2C	2
Yuzhi11_03598	PF03106	WRKY domain	4	chr3	612	66021.9	5.56			Baizhima_18879	T2C	2
Yuzhi11_04588	PF03106	WRKY domain	3	chr3	308	34358.8	9.36			Baizhima_20488	T2C	1
Yuzhi11_05224	PF03106	WRKY domain	3	chr3	280	30528.8	9.67			Baizhima_22822	T2C	1
Baizhima_07573	PF03106	WRKY domain	2	chr3	372	41478.3	6.17			Baizhima_25943	T2C	2
Baizhima_07781	PF03106	WRKY domain	4	chr3	602	64693.6	5.62			Baizhima_27282	T2C	11
Baizhima_09190	PF03106	WRKY domain	3	chr3	308	34416.9	9.3			Baizhima_27487	T2C	2
Baizhima_09838	PF03106	WRKY domain	2	chr3	335	36515.3	9.57			Baizhima_28206	T2C	2
Swetha_13727	PF03106	WRKY domain	3	Chr4	493	54330.8	6.77			Baizhima_28247	T2C	2
Swetha_13729	PF03106	WRKY domain	2	Chr4	192	21433.2	5.99			Baizhima_29151	T2C	2
Swetha_13781	PF03106	WRKY domain	2	Chr4	318	34504.1	6.11			Baizhima_30593	T2C	6
Swetha_14611	PF03106	WRKY domain	2	Chr4	342	37749.6	5.66			Baizhima_30863	T2C	2
Swetha_14675	PF03106	WRKY domain	10	Chr4	710	78019.1	5.02			Mishuozhima_00455	T2C	2
Swetha_15080	PF03106	WRKY domain	2	Chr4	316	35596.6	5.27			Mishuozhima_02108	T2C	2
Swetha_15083	PF03106	WRKY domain	0	Chr4	158	17406.3	5.32			Mishuozhima_03444	T2C	3
Swetha_16173	PF03106	WRKY domain	4	Chr4	760	84339.8	6.28			Mishuozhima_04446	T2C	2
Swetha_16175	PF03106	WRKY domain	4	Chr4	731	81680.1	6.23			Mishuozhima_06538	T2C	1
Mishuozhima_10568	PF03106	WRKY domain	3	Chr4	493	54330.8	6.77			Mishuozhima_07137	T2C	2
Mishuozhima_10600	PF03106	WRKY domain	2	Chr4	318	34504.1	6.11			Mishuozhima_08695	T2C	3
Mishuozhima_11288	PF03106	WRKY domain	2	Chr4	371	40341.1	4.93			Mishuozhima_10600	T2C	2
Mishuozhima_11579	PF03106	WRKY domain	2	Chr4	316	35596.6	5.27			Mishuozhima_11580	T2C	2
Mishuozhima_11580	PF03106	WRKY domain	2	chr4	341	37753.2	5.82			Mishuozhima_14908	T2C	2
Zhongzhi13_08421	PF03106	WRKY domain	3	Chr4	384	42801.1	7.74			Mishuozhima_16722	T2C	2
Zhongzhi13_08457	PF03106	WRKY domain	2	Chr4	316	34304.9	6			Mishuozhima_18620	T2C	2
Zhongzhi13_09283	PF03106	WRKY domain	2	Chr4	342	37749.6	5.66			Mishuozhima_20182	T2C	1
Zhongzhi13_09335	PF03106	WRKY domain	2	Chr4	371	40341.1	4.93			Mishuozhima_22473	T2C	1
Zhongzhi13_09637	PF03106	WRKY domain	2	Chr4	299	33624.4	5.25			Mishuozhima_25401	T2C	2
Zhongzhi13_09638	PF03106	WRKY domain	2	Chr4	341	37753.2	5.82			Mishuozhima_26690	T2C	11
Zhongzhi13_10493	PF03106	WRKY domain	4	Chr4	760	84339.8	6.28			Mishuozhima_27599	T2C	2
Yuzhi11_05885	PF03106	WRKY domain	3	chr4	493	54330.8	6.77			Mishuozhima_27650	T2C	2
Yuzhi11_05912	PF03106	WRKY domain	2	chr4	318	34504.1	6.11			Mishuozhima_28573	T2C	2
Yuzhi11_06213	PF03106	WRKY domain	2	chr4	371	40341.1	4.93			Mishuozhima_29606	T2C	2
Yuzhi11_07075	PF03106	WRKY domain	4	chr4	760	84318.8	6.28			Mishuozhima_30045	T2C	6
Baizhima_10878	PF03106	WRKY domain	3	chr4	493	54330.8	6.77			Mishuozhima_30302	T2C	2
Baizhima_10914	PF03106	WRKY domain	2	chr4	318	34504.1	6.11			SIN_1021618	T2C	3
Baizhima_11581	PF03106	WRKY domain	2	chr4	371	40341.1	4.93			Swetha_00918	T2C	2
Baizhima_11863	PF03106	WRKY domain	2	chr4	316	35596.6	5.27			Swetha_03115	T2C	2
Baizhima_12604	PF03106	WRKY domain	4	chr4	760	84339.8	6.28			Swetha_04251	T2C	1
Baizhima_11864	PF03106	WRKY domain	2	chr4	341	37753.2	5.82			Swetha_05796	T2C	1
Swetha_16214	PF03106	WRKY domain	5	Chr5	442	49266.8	6.38			Swetha_06026	T2C	7
Mishuozhima_12424	PF03106	WRKY domain	4	chr5	553	61637.5	6.45			Swetha_06086	T2C	2
Zhongzhi13_10532	PF03106	WRKY domain	4	Chr5	540	60101.7	6.27			Swetha_06684	T2C	2
Yuzhi11_07110	PF03106	WRKY domain	4	chr5	553	61637.5	6.45			Swetha_09138	T2C	4
Baizhima_12716	PF03106	WRKY domain	4	chr5	437	48520.4	5.36			Swetha_09460	T2C	1
Swetha_18596	PF03106	WRKY domain	10	Chr6	803	90420.1	9.45			Swetha_09527	T2C	2
Swetha_19182	PF03106	WRKY domain	6	Chr6	580	62659.8	9.34			Swetha_09533	T2C	14
Swetha_19273	PF03106	WRKY domain	4	Chr6	310	33934.5	5.5			Swetha_11646	T2C	3
Swetha_19579	PF03106	WRKY domain	7	Chr6	332	38386.1	5.56			Swetha_13729	T2C	2
Swetha_19583	PF03106	WRKY domain	2	Chr6	160	18488.5	7.76			Swetha_13781	T2C	2
Swetha_20694	PF03106	WRKY domain	3	Chr6	296	33484.8	9.1			Swetha_15083	T2C	0
Swetha_20696	PF03106	WRKY domain	4	Chr6	247	28240.6	9.12			Swetha_19579	T2C	7
Swetha_20700	PF03106	WRKY domain	2	Chr6	301	33696.2	5.06			Swetha_19583	T2C	2
Swetha_20702	PF03106	WRKY domain	1	Chr6	187	21297	8.55			Swetha_24419	T2C	3
Swetha_20852	PF03106	WRKY domain	4	Chr6	542	59732.7	8.08			Swetha_25707	T2C	2
Swetha_21534	PF03106	WRKY domain	2	Chr6	345	38845.8	9.55			Swetha_34424	T2C	4
Swetha_21913	PF03106	WRKY domain	2	Chr6	366	41235	4.78			Swetha_36198	T2C	11
Swetha_21917	PF03106	WRKY domain	2	Chr6	254	28812.5	5			Swetha_37469	T2C	9
Mishuozhima_14271	PF03106	WRKY domain	3	Chr6	353	39586	9.48			Swetha_40212	T2C	2
Mishuozhima_14551	PF03106	WRKY domain	2	Chr6	355	40014.4	5.95			Swetha_40878	T2C	4
Mishuozhima_14718	PF03106	WRKY domain	4	Chr6	310	33934.5	5.5			Swetha_41219	T2C	1
Mishuozhima_15901	PF03106	WRKY domain	3	Chr6	344	38882.8	5.39			Yuzhi11_01215	T2C	2
Mishuozhima_16023	PF03106	WRKY domain	9	Chr6	730	80497.3	8.7			Yuzhi11_02995	T2C	3
Mishuozhima_16499	PF03106	WRKY domain	4	Chr6	409	45619.7	9.21			Yuzhi11_03421	T2C	2
Mishuozhima_16710	PF03106	WRKY domain	2	Chr6	254	28812.5	5			Yuzhi11_04588	T2C	3
Mishuozhima_16722	PF03106	WRKY domain	2	Chr6	293	32476	5.26			Yuzhi11_05912	T2C	2
Mishuozhima_14908	PF03106	WRKY domain	2	chr6	160	18488.5	7.76			Yuzhi11_09006	T2C	2
Mishuozhima_15903	PF03106	WRKY domain	1	chr6	187	21297	8.55			Yuzhi11_10534	T2C	2
Zhongzhi13_12681	PF03106	WRKY domain	3	Chr6	353	39586	9.48			Yuzhi11_11993	T2C	2
Zhongzhi13_12988	PF03106	WRKY domain	2	Chr6	355	40014.4	5.95			Yuzhi11_13189	T2C	1
Zhongzhi13_13137	PF03106	WRKY domain	2	Chr6	346	36989	9.65			Yuzhi11_14016	T2C	2
Zhongzhi13_13210	PF03106	WRKY domain	4	Chr6	310	33934.5	5.5			Yuzhi11_15309	T2C	1
Zhongzhi13_13433	PF03106	WRKY domain	2	Chr6	160	18488.5	7.76			Yuzhi11_17788	T2C	2
Zhongzhi13_14640	PF03106	WRKY domain	3	Chr6	344	38882.8	5.39			Yuzhi11_18862	T2C	2
Zhongzhi13_14642	PF03106	WRKY domain	1	Chr6	187	21297	8.55			Yuzhi11_19004	T2C	11
Zhongzhi13_14768	PF03106	WRKY domain	4	Chr6	542	59734.6	8.08			Yuzhi11_19205	T2C	2
Zhongzhi13_15309	PF03106	WRKY domain	4	Chr6	409	45619.7	9.21			Yuzhi11_19278	T2C	2
Zhongzhi13_15593	PF03106	WRKY domain	2	Chr6	254	28812.5	5			Yuzhi11_19897	T2C	2
Zhongzhi13_15605	PF03106	WRKY domain	2	Chr6	293	32476	5.26			Yuzhi11_19933	T2C	2
Yuzhi11_08442	PF03106	WRKY domain	3	chr6	353	39586	9.48			Yuzhi11_21397	T2C	2
Yuzhi11_08746	PF03106	WRKY domain	2	chr6	355	40014.4	5.95			Yuzhi11_21782	T2C	6
Yuzhi11_08913	PF03106	WRKY domain	2	chr6	346	36989	9.65			Yuzhi11_22635	T2C	1
Yuzhi11_09613	PF03106	WRKY domain	3	chr6	344	38896.9	5.39			Yuzhi11_22771	T2C	1
Yuzhi11_09724	PF03106	WRKY domain	4	chr6	542	59720.6	8.08			Yuzhi11_25181	T2C	2
Yuzhi11_10202	PF03106	WRKY domain	2	chr6	365	41063.4	9.35			Zhongzhi13_00291	T2C	2
Yuzhi11_10522	PF03106	WRKY domain	2	chr6	254	28812.5	5			Zhongzhi13_02413	T2C	2
Yuzhi11_10534	PF03106	WRKY domain	2	chr6	293	32476	5.26			Zhongzhi13_04749	T2C	3
Yuzhi11_09006	PF03106	WRKY domain	3	chr6	160	18488.5	7.76			Zhongzhi13_04978	T2C	1
Yuzhi11_09615	PF03106	WRKY domain	2	chr6	187	21297	8.55			Zhongzhi13_05039	T2C	2
Baizhima_14557	PF03106	WRKY domain	2	chr6	157	17473.8	9.92			Zhongzhi13_06862	T2C	3
Baizhima_14850	PF03106	WRKY domain	2	chr6	355	40014.4	5.95			Zhongzhi13_08457	T2C	2
Baizhima_14976	PF03106	WRKY domain	3	chr6	364	38653.9	9.65			Zhongzhi13_09638	T2C	2
Baizhima_15045	PF03106	WRKY domain	4	chr6	310	33934.5	5.5			Zhongzhi13_13433	T2C	2
Baizhima_16195	PF03106	WRKY domain	3	chr6	344	38882.8	5.39			Zhongzhi13_15605	T2C	2
Baizhima_16315	PF03106	WRKY domain	4	chr6	542	59720.6	8.08			Zhongzhi13_18013	T2C	2
Baizhima_16771	PF03106	WRKY domain	3	chr6	409	45619.7	9.21			Zhongzhi13_20062	T2C	1
Baizhima_17041	PF03106	WRKY domain	2	chr6	254	28812.5	5			Zhongzhi13_22905	T2C	1
Baizhima_17053	PF03106	WRKY domain	2	chr6	293	32476	5.26			Zhongzhi13_23851	T2C	1
Baizhima_15231	PF03106	WRKY domain	2	chr6	160	18488.5	7.76			Zhongzhi13_26477	T2C	2
Swetha_23040	PF03106	WRKY domain	4	Chr7	386	42646.9	5.64			Zhongzhi13_28134	T2C	11
Swetha_23996	PF03106	WRKY domain	9	Chr7	950	107166	9.04			Zhongzhi13_28339	T2C	2
Mishuozhima_18313	PF03106	WRKY domain	9	chr7	950	107166	9.04			Zhongzhi13_29190	T2C	3
Zhongzhi13_16955	PF03106	WRKY domain	4	Chr7	497	54611.4	5.77			Zhongzhi13_29244	T2C	2
Zhongzhi13_17682	PF03106	WRKY domain	6	Chr7	751	84166.3	7.45			Zhongzhi13_30289	T2C	2
Yuzhi11_11054	PF03106	WRKY domain	4	chr7	497	54611.4	5.77			Zhongzhi13_31495	T2C	2
Baizhima_18023	PF03106	WRKY domain	4	chr7	497	54611.4	5.77			Zhongzhi13_32025	T2C	6
Baizhima_17686	PF03106	WRKY domain	5	chr7	573	63930.5	6.93			Zhongzhi13_32303	T2C	2
Swetha_24326	PF03106	WRKY domain	2	Chr8	452	49745.1	5.84			Baizhima_00523	T2D	2
Swetha_24419	PF03106	WRKY domain	3	Chr8	314	34811.3	6.38			Baizhima_05559	T2D	2
Swetha_24472	PF03106	WRKY domain	3	Chr8	301	33858.4	5.24			Baizhima_07083	T2D	1
Swetha_24865	PF03106	WRKY domain	3	Chr8	513	56113.5	8.28			Baizhima_09838	T2D	2
Swetha_24868	PF03106	WRKY domain	17	Chr8	1261	142022	9.13			Baizhima_14557	T2D	2
Swetha_25707	PF03106	WRKY domain	2	Chr8	235	26667.2	8.55			Baizhima_14976	T2D	3
Swetha_25903	PF03106	WRKY domain	5	Chr8	564	60938.1	6.29			Baizhima_16771	T2D	4
Swetha_25904	PF03106	WRKY domain	4	Chr8	442	47674	9.7			Baizhima_23613	T2D	2
Swetha_26111	PF03106	WRKY domain	3	Chr8	464	50935.4	7.97			Mishuozhima_00319	T2D	2
Swetha_26113	PF03106	WRKY domain	3	Chr8	690	74884.4	8.49			Mishuozhima_04503	T2D	3
Swetha_26862	PF03106	WRKY domain	3	Chr8	561	60645.3	6.14			Mishuozhima_05387	T2D	2
Swetha_26866	PF03106	WRKY domain	6	Chr8	483	53823.4	6.3			Mishuozhima_06713	T2D	1
Swetha_27391	PF03106	WRKY domain	4	Chr8	493	54342.6	8.37			Mishuozhima_09322	T2D	2
Mishuozhima_18548	PF03106	WRKY domain	2	Chr8	452	49673	5.84			Mishuozhima_14271	T2D	3
Mishuozhima_18620	PF03106	WRKY domain	2	Chr8	312	34808.3	6.11			Mishuozhima_16499	T2D	4
Mishuozhima_18943	PF03106	WRKY domain	3	Chr8	513	56113.5	8.28			Mishuozhima_23240	T2D	2
Mishuozhima_19837	PF03106	WRKY domain	3	Chr8	577	62678.6	7.89			Swetha_00675	T2D	2
Mishuozhima_20370	PF03106	WRKY domain	3	Chr8	561	60645.3	6.14			Swetha_12711	T2D	1
Mishuozhima_20687	PF03106	WRKY domain	4	Chr8	493	54238.4	7.14			Swetha_12712	T2D	2
Mishuozhima_18646	PF03106	WRKY domain	2	chr8	301	33858.4	5.24			Swetha_18596	T2D	10
Mishuozhima_20182	PF03106	WRKY domain	1	chr8	162	18949.2	8.89			Swetha_19182	T2D	6
Zhongzhi13_17943	PF03106	WRKY domain	1	Chr8	397					Swetha_21534	T2D	2
Zhongzhi13_18013	PF03106	WRKY domain	2	Chr8	312	34808.3	6.11			Swetha_28528	T2D	2
Zhongzhi13_18384	PF03106	WRKY domain	3	Chr8	513	56113.5	8.28			Swetha_31194	T2D	2
Zhongzhi13_19532	PF03106	WRKY domain	5	Chr8	564	60989.1	6.19			Swetha_34609	T2D	1
Zhongzhi13_19696	PF03106	WRKY domain	3	Chr8	577	62678.6	7.89			Yuzhi11_00107	T2D	2
Zhongzhi13_20062	PF03106	WRKY domain	1	Chr8	162	18949.2	8.89			Yuzhi11_02269	T2D	2
Zhongzhi13_20329	PF03106	WRKY domain	3	Chr8	561	60645.3	6.14			Yuzhi11_05224	T2D	3
Zhongzhi13_20690	PF03106	WRKY domain	4	Chr8	493	54342.6	8.37			Yuzhi11_08442	T2D	3
Yuzhi11_11924	PF03106	WRKY domain	2	chr8	452	49673	5.84			Yuzhi11_08913	T2D	2
Yuzhi11_11993	PF03106	WRKY domain	2	chr8	312	34808.3	6.11			Yuzhi11_10202	T2D	2
Yuzhi11_12196	PF03106	WRKY domain	3	chr8	464	50651.5	8.04			Yuzhi11_16159	T2D	2
Yuzhi11_12704	PF03106	WRKY domain	5	chr8	564	60982.1	6.29			Yuzhi11_17922	T2D	1
Yuzhi11_12853	PF03106	WRKY domain	2	chr8	365	39931.3	8.84			Zhongzhi13_00117	T2D	2
Yuzhi11_13325	PF03106	WRKY domain	3	chr8	561	60645.3	6.14			Zhongzhi13_03714	T2D	3
Yuzhi11_13189	PF03106	WRKY domain	1	chr8	162	18949.2	8.89			Zhongzhi13_07633	T2D	2
Baizhima_18830	PF03106	WRKY domain	2	chr8	450	49306.6	5.49			Zhongzhi13_12681	T2D	3
Baizhima_18879	PF03106	WRKY domain	2	chr8	312	34808.3	6.11			Zhongzhi13_13137	T2D	2
Baizhima_20032	PF03106	WRKY domain	5	chr8	564	60982.1	6.29			Zhongzhi13_15309	T2D	4
Baizhima_20170	PF03106	WRKY domain	3	chr8	577	62694.6	7.89			Zhongzhi13_23735	T2D	2
Baizhima_20694	PF03106	WRKY domain	3	chr8	561	60645.3	6.14			Zhongzhi13_26627	T2D	1
Baizhima_21014	PF03106	WRKY domain	4	chr8	493	54238.4	7.14			Baizhima_02538	T2E	3
Baizhima_18902	PF03106	WRKY domain	2	chr8	301	33858.4	5.24			Baizhima_11581	T2E	2
Baizhima_20488	PF03106	WRKY domain	1	chr8	162	18949.2	8.89			Baizhima_16195	T2E	3
Swetha_28528	PF03106	WRKY domain	2	Chr9	212	23309.6	9.8			Baizhima_17041	T2E	2
Swetha_31194	PF03106	WRKY domain	2	Chr9	314	34160.4	9.48			Baizhima_18902	T2E	2
Swetha_31558	PF03106	WRKY domain	3	Chr9	479	52046.1	6.06			Baizhima_26060	T2E	2
Mishuozhima_23240	PF03106	WRKY domain	2	Chr9	343	37244.9	9.6			Baizhima_26207	T2E	2
Mishuozhima_23487	PF03106	WRKY domain	3	Chr9	493	53540.7	6.06			Baizhima_29097	T2E	2
Mishuozhima_23545	PF03106	WRKY domain	3	Chr9	511	55291.7	7.63			Mishuozhima_02367	T2E	3
Mishuozhima_22473	PF03106	WRKY domain	1	chr9	129	15365.1	8.8			Mishuozhima_11288	T2E	2
Zhongzhi13_22905	PF03106	WRKY domain	1	Chr9	129	15365.1	8.8			Mishuozhima_15901	T2E	3
Zhongzhi13_23735	PF03106	WRKY domain	2	Chr9	291	31598.7	9.72			Mishuozhima_16710	T2E	2
Zhongzhi13_23851	PF03106	WRKY domain	1	Chr9	187	21249.9	9.47			Mishuozhima_18646	T2E	2
Zhongzhi13_24031	PF03106	WRKY domain	3	Chr9	479	52046.1	6.06			Mishuozhima_25520	T2E	2
Zhongzhi13_24090	PF03106	WRKY domain	3	Chr9	511	55400.8	8.04			Mishuozhima_25659	T2E	2
Yuzhi11_16041	PF03106	WRKY domain	4	chr9	310	33934.5	5.5			Mishuozhima_28532	T2E	2
Yuzhi11_16159	PF03106	WRKY domain	2	chr9	343	37244.9	9.6			Swetha_03474	T2E	4
Yuzhi11_15309	PF03106	WRKY domain	2	chr9	129	15365.1	8.8			Swetha_14675	T2E	10
Baizhima_23613	PF03106	WRKY domain	2	chr9	334	36249.8	9.65			Swetha_20694	T2E	3
Baizhima_23876	PF03106	WRKY domain	3	chr9	493	53540.7	6.06			Swetha_20700	T2E	2
Baizhima_23935	PF03106	WRKY domain	3	chr9	511	55291.7	7.63			Swetha_21913	T2E	2
Baizhima_22822	PF03106	WRKY domain	1	chr9	129	15365.1	8.8			Swetha_21917	T2E	2
Swetha_06086	PF03106	WRKY domain	2	JPLX01000017.1	191	21712.5	9.47			Swetha_24472	T2E	3
Swetha_06527	PF03106	WRKY domain	2	JPLX01000116.1	350	39248.6	5.05			Swetha_34662	T2E	3
Swetha_04277	PF03106	WRKY domain	4	JPLX01000265.1	553	61658.5	6.38			Swetha_38725	T2E	2
Swetha_04251	PF03106	WRKY domain	1	JPLX01000635.1	177	20682.1	8.8			Swetha_38738	T2E	2
Swetha_06379	PF03106	WRKY domain	4	JPLX01000716.1	497	54611.4	5.77			Yuzhi11_01468	T2E	3
Swetha_06502	PF03106	WRKY domain	4	JPLX01001144.1	728	78057.7	5.93			Yuzhi11_06213	T2E	2
Swetha_06026	PF03106	WRKY domain	7	JPLX01001235.1	610	69172.7	9.12			Yuzhi11_09613	T2E	3
Swetha_06684	PF03106	WRKY domain	2	JPLX01001743.1	305	34248.7	6.15			Yuzhi11_10522	T2E	2
Swetha_05796	PF03106	WRKY domain	1	JPLX01002569.1	185	20694.3	6.32			Yuzhi11_17950	T2E	2
Yuzhi11_03305	PF03106	WRKY domain	4	scaffold00002	493	54342.6	8.37			Yuzhi11_18013	T2E	2
Yuzhi11_13890	PF03106	WRKY domain	2	scaffold00008	462	49635.5	5.38			Yuzhi11_20764	T2E	3
Yuzhi11_14016	PF03106	WRKY domain	1	scaffold00008	300	33916.3	6.24			Zhongzhi_26659	T2E	1
Yuzhi11_19278	PF03106	WRKY domain	2	scaffold00012	184	20779	6.07			Zhongzhi13_02671	T2E	3
Yuzhi11_22771	PF03106	WRKY domain	1	scaffold00051	183	21119.2	9.2			Zhongzhi13_09335	T2E	2
Yuzhi11_22954	PF03106	WRKY domain	1	scaffold00053	348	39433.7	5.71			Zhongzhi13_14640	T2E	3
Yuzhi11_23067	PF03106	WRKY domain	2	scaffold00080	479	52046.1	6.06			Zhongzhi13_15593	T2E	2
Yuzhi11_23124	PF03106	WRKY domain	3	scaffold00080	511	55400.8	8.04			Zhongzhi13_26827	T2E	2
Yuzhi11_23561	PF03106	WRKY domain	3	scaffold00117	564	60875.3	7.16			Zhongzhi13_30232	T2E	2
Yuzhi11_23930	PF03106	WRKY domain	9	scaffold00148	950	107166	9.04			Baizhima_01413	T3	2
Yuzhi11_24840	PF03106	WRKY domain	5	scaffold0295	528	57317.8	7.23			Baizhima_07052	T3	2
Yuzhi11_25180	PF03106	WRKY domain	4	scaffold0399	316	35596.6	5.27			Baizhima_07261	T3	9
Yuzhi11_25181	PF03106	WRKY domain	2	scaffold0399	341	37753.2	5.82			Baizhima_11863	T3	2
Mishuozhima_02666	PF03106	WRKY domain	5	tarseq_10066_000001	564	60989.1	6.19			Baizhima_14850	T3	2
Baizhima_07261	PF03106	WRKY domain	9	tarseq_10960_000002	950	107166	9.04			Mishuozhima_01183	T3	2
Mishuozhima_03045	PF03106	WRKY domain	4	tarseq_12960_000001	497	54611.4	5.77			Mishuozhima_06652	T3	2
Mishuozhima_04503	PF03106	WRKY domain	3	tarseq_1345_000002	364	38653.9	9.65			Mishuozhima_11579	T3	2
Mishuozhima_02432	PF03106	WRKY domain	5	tarseq_14724_000001	431	47021.9	6.89			Mishuozhima_14551	T3	2
Baizhima_10164	PF03106	WRKY domain	2	tarseq_1640_000003	350	39247.6	4.99			Mishuozhima_18313	T3	9
Mishuozhima_03451	PF03106	WRKY domain	4	tarseq_176_000001	760	84339.8	6.28			Swetha_14611	T3	2
Mishuozhima_04446	PF03106	WRKY domain	2	tarseq_222_000002	327	36685	6.43			Swetha_15080	T3	2
Baizhima_07052	PF03106	WRKY domain	2	tarseq_4301_000002	342	37749.6	5.66			Swetha_23996	T3	9
Mishuozhima_06652	PF03106	WRKY domain	2	tarseq_4678_000002	342	37749.6	5.66			Yuzhi11_08746	T3	2
Baizhima_04778	PF03106	WRKY domain	2	tarseq_5522_000002	315	35547.3	7.74			Yuzhi11_22954	T3	2
Baizhima_07083	PF03106	WRKY domain	1	tarseq_5753_000002	201	22752.3	5.13			Yuzhi11_23930	T3	9
Mishuozhima_03444	PF03106	WRKY domain	3	tarseq_6658_000001	365	39207.5	7.59			Yuzhi11_25180	T3	2
Baizhima_06844	PF03106	WRKY domain	3	tarseq_6695_000002	513	56113.5	8.28			Zhongzhi13_01348	T3	2
Mishuozhima_06713	PF03106	WRKY domain	1	tarseq_8387_000002	201	22752.3	5.13			Zhongzhi13_09283	T3	2
Baizhima_06772	PF03106	WRKY domain	3	tarseq_9825_000002	273	30152.8	6.9			Zhongzhi13_09637	T3	2
Baizhima_06773	PF03106	WRKY domain	1	tarseq_9825_000002	187	21249.9	9.47			Zhongzhi13_12988	T3	2
Yuzhi11_18904	PF03106	WRKY domain	2		405	44631.2	9.53			Zhongzhi13_17682	T3	6
Yuzhi11_20764	PF03106	WRKY domain	4		285	31.96	5.49
Yuzhi11_22635	PF03106	WRKY domain	6		187	21.25	9.47

## Sheet: Micro_exons
SI-3A The distribution of micro_exons among AP2/ERF genes in sesame pan-genome										SI-3B The distribution of micro_exons among WRKY genes in sesame pan-genome
Class	Count	GENE	Sub_family	Micro_exon_number						Genome	Class	Count	GENE	Sub_family	Micro_exon_number
AP2	34	Baizhima 00238	AP2	1						Baizhima	T2C	2	Mishuozhima_16023	T1	1
ERF-B3	3	Baizhima 01880	AP2	2						Baizhima	T2D	1	Baizhima_02538	T2E	1
SOLOIST	1	Baizhima 04246	AP2	2						Baizhima	T2E	1	Baizhima_16771	T2D	1
AP2	30	Baizhima 05663	AP2	1						Mishouzhima	T1	1	Baizhima_30593	T2C	2
ERF-B3	3	Baizhima 05820	AP2	1						Mishouzhima	T2C	2	Mishuozhima_02367	T2E	1
SOLOIST	1	Baizhima 06070	AP2	1						Mishouzhima	T2D	2	Mishuozhima_14271	T2D	1
AP2	44	Baizhima 06882	AP2	1						Mishouzhima	T2E	1	Mishuozhima_16499	T2D	1
DREB-A2	1	Baizhima 08704	AP2	1						Swetha	T1	3	Mishuozhima_30045	T2C	2
DREB-A4	2	Baizhima 09780	AP2	1						Swetha	T2B	2	SIN_1021618	T2C	1
ERF-B1	1	Baizhima 10330	AP2	1						Swetha	T2C	4	Swetha_06086	T2C	1
ERF-B6	1	Baizhima 12504	AP2	3						Swetha	T2D	1	Swetha_09533	T2C	1
RAV	1	Baizhima 12573	AP2	2						Swetha	T2E	2	Swetha_18596	T2D	1
SOLOIST	2	Baizhima 14285	AP2	3						Yuzhi_11	T2C	2	Swetha_19579	T2C	1
AP2	30	Baizhima 16634	AP2	4						Yuzhi_11	T2D	1	Swetha_20696	T1	2
ERF-B1	1	Baizhima 18367	AP2	1						Yuzhi_11	T2E	1	Swetha_20700	T2E	1
SOLOIST	1	Baizhima 19229	AP2	1						Zhongzhi_13	T2C	3	Swetha_24868	T1	1
AP2	33	Baizhima 23371	AP2	1						Zhongzhi_13	T2D	2	Swetha_38328	T2B	2
DREB-A4	1	Baizhima 23621	AP2	1						Zhongzhi_13	T2E	1	Swetha_38738	T2E	1
ERF-B3	3	Baizhima 23871	AP2	1									Swetha_40878	T2C	1
SOLOIST	1	Baizhima 29293	AP2	1									Yuzhi11_01468	T2E	1
		Baizhima 30581	AP2	1									Yuzhi11_08442	T2D	1
		Baizhima 30706	AP2	1									Yuzhi11_21782	T2C	2
		Baizhima 31489	AP2	2									Zhongzhi13_02671	T2E	1
		Mishuozhima 01681	AP2	2									Zhongzhi13_12681	T2D	1
		Mishuozhima 01934	AP2	1									Zhongzhi13_15309	T2D	1
		Mishuozhima 05483	AP2	1									Zhongzhi13_32025	T2C	2
		Mishuozhima 05634	AP2	1
		Mishuozhima 05883	AP2	1
		Mishuozhima 08252	AP2	1
		Mishuozhima 09280	AP2	1
		Mishuozhima 12226	AP2	3
		Mishuozhima 12301	AP2	2
		Mishuozhima 13998	AP2	3
		Mishuozhima 16334	AP2	1
		Mishuozhima 18017	AP2	1
		Mishuozhima 18999	AP2	1
		Mishuozhima 21482	AP2	2
		Mishuozhima 22993	AP2	1
		Mishuozhima 23248	AP2	1
		Mishuozhima 23482	AP2	1
		Mishuozhima 28717	AP2	1
		Mishuozhima 30005	AP2	1
		Mishuozhima 30032	AP2	1
		Mishuozhima 30161	AP2	1
		Mishuozhima 30931	AP2	2
		Swetha 02512	AP2	2
		Swetha 02835	AP2	2
		Swetha 03766	AP2	1
		Swetha 05159	AP2	2
		Swetha 07942	AP2	2
		Swetha 08528	AP2	1
		Swetha 10977	AP2	1
		Swetha 12618	AP2	1
		Swetha 12621	AP2	2
		Swetha 16019	AP2	3
		Swetha 16020	AP2	3
		Swetha 16136	AP2	2
		Swetha 18219	AP2	1
		Swetha 18222	AP2	5
		Swetha 21316	AP2	1
		Swetha 24927	AP2	1
		Swetha 28613	AP2	2
		Swetha 29014	AP2	1
		Swetha 30858	AP2	1
		Swetha 30866	AP2	1
		Swetha 31543	AP2	1
		Swetha 31547	AP2	1
		Swetha 33068	AP2	1
		Swetha 39000	AP2	1
		Swetha 40799	AP2	1
		Swetha 40862	AP2	1
		Swetha 41017	AP2	1
		Swetha 41771	AP2	2
		Yuzhi11 00808	AP2	2
		Yuzhi11 02342	AP2	1
		Yuzhi11 02483	AP2	1
		Yuzhi11 02708	AP2	1
		Yuzhi11 04173	AP2	1
		Yuzhi11 05172	AP2	1
		Yuzhi11 06982	AP2	3
		Yuzhi11 07044	AP2	2
		Yuzhi11 08258	AP2	3
		Yuzhi11 10025	AP2	4
		Yuzhi11 11424	AP2	2
		Yuzhi11 11470	AP2	1
		Yuzhi11 12227	AP2	1
		Yuzhi11 13872	AP2	1
		Yuzhi11 14439	AP2	2
		Yuzhi11 15749	AP2	1
		Yuzhi11 21770	AP2	1
		Yuzhi11 23062	AP2	1
		Yuzhi11 25422	AP2	1
		Zhongzhi13 01920	AP2	2
		Zhongzhi13 03834	AP2	1
		Zhongzhi13 03999	AP2	1
		Zhongzhi13 04281	AP2	1
		Zhongzhi13 06339	AP2	1
		Zhongzhi13 07576	AP2	1
		Zhongzhi13 10370	AP2	3
		Zhongzhi13 10461	AP2	2
		Zhongzhi13 12386	AP2	3
		Zhongzhi13 15124	AP2	4
		Zhongzhi13 17382	AP2	1
		Zhongzhi13 18440	AP2	1
		Zhongzhi13 21657	AP2	2
		Zhongzhi13 23474	AP2	1
		Zhongzhi13 23742	AP2	1
		Zhongzhi13 24026	AP2	1
		Zhongzhi13 30427	AP2	1
		Zhongzhi13 31963	AP2	1
		Zhongzhi13 32014	AP2	1
		Zhongzhi13 33551	AP2	2
		Zhongzhi13 33595	AP2	2
		Swetha 22765	DREB-A2	1
		Swetha_00824	DREB-A4	1
		Swetha_10826	DREB-A4	1
		Zhongzhi13_10152	DREB-A4	1
		Swetha 36738	ERF-B1	1
		Yuzhi11 19862	ERF-B1	1
		Baizhima 02301	ERF-B3	1
		Baizhima 12047	ERF-B3	2
		Mishuozhima 02131	ERF-B3	1
		Mishuozhima 03111	ERF-B3	2
		Zhongzhi13 02437	ERF-B3	1
		Zhongzhi13 09838	ERF-B3	2
		Swetha 28474	ERF-B6	1
		Swetha 23066	RAV	1
		Baizhima 21990	SOLOIST	1
		Mishuozhima 21609	SOLOIST	1
		Swetha 28399	SOLOIST	1
		Swetha 28864	SOLOIST	1
		Yuzhi11 14632	SOLOIST	1
		Zhongzhi13 21859	SOLOIST	1

## Sheet: AP2_EXINT_size
SI-4 The variation in exon-intron sequences among AP2/ERF homologs in the sesame pan-genome. The microexon genes are marked with green colour while the large intron containing genes are marked yellow.
Gene	Intron	mRNA	Exon-1	Exon-2	Exon-3	Exon-4	Exon-5	Exon-6	Exon-7	Exon-8	Exon-9	Exon-10	Exon-11	Exon-12	Exon-13	Intron-1	Intron-2	Intron-3	Intron-4	Intron-5	Intron-6	Intron-7	Intron-8	Intron-9	Intron-10	Intron-11	Intron-12	Intron-13
Yuzhi11_20097	0	1052	1052		microexon:184
Zhongzhi13_29442	0	1052	1052
Swetha_04806	0	1052	1052
Mishuozhima_02700	0	1052	1052
Baizhima_00193	0	1052	1052
Baizhima_04040	0	1217	1217
Swetha_03929	0	1217	1217
Mishuozhima_18673	0	1181	1181
Yuzhi11_12060	0	1181	1181
Zhongzhi13_18090	0	1103	1103
Swetha_24518	0	893	893
Swetha_00824	4	5366	43	62	348	310	735	AP2+exostosin	Cell wall biosynthesis							1804	497	219	1348
Baizhima_00614	0	731	731
Mishuozhima_00404	0	731	731
Swetha_05899	0	731	731
Zhongzhi13_00224	0	731	731
Yuzhi11_19341	0	596	596
Mishuozhima_14812	0	752	752
Swetha_19431	0	752	752
Baizhima_15153	0	752	752
Yuzhi11_23269	0	746	746
Yuzhi11_10447	0	677	677
Zhongzhi13_01790	0	677	677
Swetha_06472	0	677	677
Swetha_02342	0	677	677
Mishuozhima_01555	0	677	677
Baizhima_03772	0	677	677
Baizhima_08625	0	647	647
Mishuozhima_08136	0	647	647
Yuzhi11_04085	0	647	647
Zhongzhi13_06212	0	647	647
Swetha_10826	1	922	532	3	microexon											387
Mishuozhima_13532	0	806	806
Zhongzhi13_11895	0	806	806
Baizhima_13836	0	806	806
Swetha_17617	2	6814	226	139	727											3429	2293
Yuzhi11_18435	0	731	731
Zhongzhi13_27622	0	731	731
Baizhima_26830	0	731	731
Mishuozhima_26242	0	731	731
Baizhima_02316	0	860	860
Swetha_03175	0	860	860
Yuzhi11_01251	0	860	860
Zhongzhi13_02453	0	860	860
Mishuozhima_02146	0	860	860
Mishuozhima_25727	0	758	758
Zhongzhi13_26907	0	758	758
Baizhima_04674	0	758	758
Yuzhi11_18087	0	758	758
Baizhima_15884	3	4003	67	158	146	786										531	96	2219
Zhongzhi13_14296	3	4011	67	158	146	786										540	96	2218
Mishuozhima_15587	3	4024	67	158	146	786										540	96	2231
Yuzhi11_09349	0	752	752
Swetha_20270	0	752	752
Baizhima_07127	0	527	527
Baizhima_01209	0	635	635
Mishuozhima_03229	0	635	635
Zhongzhi13_01108	0	563	563
Baizhima_16098	0	629	629
Yuzhi11_09511	0	629	629
Zhongzhi13_14539	0	629	629
Mishuozhima_15802	0	629	629
Mishuozhima_11384	0	677	677
Zhongzhi13_09430	0	677	677
Baizhima_11676	0	677	677
Swetha_23957	0	833	833
Zhongzhi13_17646	1	1269	597	236		helitron	215-296	Copia	133-295							437
Mishuozhima_18276	0	611	611
Baizhima_18591	0	611	611
Yuzhi11_14103	0	668	668
Yuzhi11_14166	0	668	668
Mishuozhima_21198	0	668	668
Baizhima_21615	0	668	668
Swetha_28226	0	683	683
Mishuozhima_21812	0	659	659
Swetha_29177	0	659	659
Yuzhi11_14834	0	659	659
Zhongzhi13_22112	0	659	659
Baizhima_22183	0	659	659
Baizhima_01214	0	689	689
Mishuozhima_00970	0	689	689
Zhongzhi13_01115	0	689	689
Swetha_01481	1	3263	384	136												2743
Swetha_20564	1	3175	546	268												2361
Mishuozhima_15803	0	758	758
Zhongzhi13_14540	0	758	758
Baizhima_16099	0	758	758
Yuzhi11_09512	0	758	758
Baizhima_11675	0	596	596
Mishuozhima_11383	0	596	596
Zhongzhi13_09429	0	506	506
Yuzhi11_06305	1	1676	270	193		AP2+Alpha-Amylase Inhibitors (AAI), Lipid Transfer (LT) and Seed Storage (SS) Protein										1213
Baizhima_12303	0	566	566
Yuzhi11_06905	0	566	566
Mishuozhima_12028	1	2265	170	521												1574
Zhongzhi13_10152	2	2301	170	28	618											191	1294
Swetha_15741	0	566	566
Baizhima_14217	0	581	581
Mishuozhima_13929	0	581	581
Zhongzhi13_12318	0	422	422
Swetha_18147	5	4460	327	97	119	443	1288	84								267	405	89	489	852
Yuzhi11_01606	0	524	524
Zhongzhi13_02825	0	524	524
Swetha_04095	0	524	524
Mishuozhima_04624	0	524	524
Baizhima_04831	0	524	524
Mishuozhima_04837	0	1031	1031
Swetha_07072	0	1031	1031
Swetha_07074	0	1031	1031
Baizhima_05006	0	1031	1031
Yuzhi11_01813	2	1934	912	64	167											126	665
Zhongzhi13_03050	1	982	770	143												69
Yuzhi11_05083	0	980	980
Zhongzhi13_07468	0	992	992
Mishuozhima_09175	0	992	992
Baizhima_09679	0	992	992
Yuzhi11_21970	0	1109	1109
Zhongzhi13_32245	0	1109	1109
Swetha_41134	0	1109	1109
Mishuozhima_30248	0	1109	1109
Baizhima_30810	0	1109	1109
Mishuozhima_22144	0	968	968
Yuzhi11_15086	0	968	968
Zhongzhi13_22498	0	968	968
Mishuozhima_01185	0	893	893
Yuzhi11_22952	0	893	893
Baizhima_07499	0	893	893
Zhongzhi13_01351	0	893	893
Mishuozhima_14540	0	875	875
Yuzhi11_08737	0	872	872
Baizhima_14839	0	875	875
Baizhima_09478	0	1043	1043
Yuzhi11_04823	0	1043	1043
Mishuozhima_08966	0	1043	1043
Baizhima_25424	0	1259	1259
Mishuozhima_24951	0	1259	1259
Yuzhi11_25993	0	1262	1262
Zhongzhi13_25868	0	1259	1259
Swetha_33643	0	1259	1259
Baizhima_14011	0	674	674
Mishuozhima_02619	0	674	674
Swetha_17848	0	674	674
Zhongzhi13_12070	0	659	659
Baizhima_26970	0	674	674
Swetha_35823	0	674	674
Yuzhi11_18617	0	674	674
Zhongzhi13_27806	0	674	674
Mishuozhima_26404	0	674	674
Mishuozhima_26403	0	515	515
Yuzhi11_18616	0	515	515
Baizhima_26969	0	515	515
Baizhima_15050	0	689	689
Mishuozhima_14723	0	689	689
Yuzhi11_16046	0	689	689
Zhongzhi13_13215	0	689	689
Mishuozhima_05384	1	624	326	56												242
Yuzhi11_02279	1	623	326	56												241
Baizhima_05558	1	625	326	56												243
SIN_1005434	0	449	449
Yuzhi11_05219	0	467	467
Zhongzhi13_07628	0	467	467
Swetha_12700	0	467	467
Baizhima_09833	0	467	467
Mishuozhima_09316	0	467	467
Baizhima_23619	0	473	473
Mishuozhima_23246	0	473	473
Baizhima_30580	0	458	458
Yuzhi11_21769	0	458	458
Mishuozhima_30031	0	458	458
Zhongzhi13_32012	1	768	91	273												404
Baizhima_04836	0	509	509
Zhongzhi13_02830	0	659	659
Mishuozhima_04629	0	509	509
Swetha_06775	0	509	509
Swetha_04100	0	509	509
Yuzhi11_02176	0	728	728
Zhongzhi13_03469	0	728	728
Baizhima_05379	0	728	728
Mishuozhima_05223	0	725	725
Baizhima_07378	0	716	716
Mishuozhima_09600	0	716	716
Swetha_13076	0	716	716
Yuzhi11_05512	0	713	713
Zhongzhi13_07931	0	713	713
Baizhima_03242	1	2193	165	601												1427
Mishuozhima_04565	1	2193	165	601												1427
Zhongzhi13_20122	1	2215	165	601												1449
Yuzhi1122408	1	2184	156	601												1427
Swetha_26615	1	2273	165	601												1507
Swetha_11540	4	5729	132	160	77	309	625		40S ribosomal protein S15a, DNA translocase FtsK, AP2							90	179	3813	344
Zhongzhi13_06780	1	1278	309	625												344
Mishuozhima_08624	1	1278	309	625												344
Yuzhi11_04520	1	1278	309	625												344
Swetha_11545	1	1278	309	625												344
Baizhima_09111	1	1278	309	625												344
Baizhima_05229	1	1745	498	754												493
Mishuozhima_05067	1	1745	498	754												493
Yuzhi11_01909	1	1745	498	754												493
Zhongzhi13_03306	1	1746	498	754												494
Mishuozhima_25363	1	1769	168	508												1093
Yuzhi11_17733	1	865	168	508												189
Swetha_34339	1	782	172	453												157
Baizhima_25882	0	461	461
Baizhima_22475	1	1428	399	733												296
Mishuozhima_22086	1	1428	399	733												296
Yuzhi11_15043	1	1428	399	733												296
Zhongzhi13_22412	1	1428	399	733												296
Swetha_29550	1	1428	399	733												296
Yuzhi11_25460	1	2192	282	892												1018
Zhongzhi13_01706	1	2162	282	892												988
Baizhima_01712	1	2160	282	892												986
Mishuozhima_01491	1	2167	282	892												993
Swetha_02245	5	6152	332	135	645	159	93	892	Translation initiation factor 2B subunit, eIF-2B alpha/beta/delta family+ AP2							487	1460	911	415	623
Baizhima_08744	1	2171	282	898												991
Mishuozhima_08292	1	2171	282	898												991
Swetha_05910	1	2171	282	898												991
Yuzhi11_04212	1	2171	282	898												991
Zhongzhi13_06381	1	2171	282	898												991
Yuzhi11_22530	1	838	156	598												84
Zhongzhi13_15539	1	838	156	598												84
Swetha_21844	1	838	156	598												84
Mishuozhima_02486	1	838	156	598												84
Baizhima_16991	1	838	156	598												84
Swetha_38628	0	476	476
Swetha_38630	0	476	476
Mishuozhima_02534	0	434	434
Zhongzhi13_30166	0	434	434
Baizhima_29032	0	434	434
Yuzhi11_20703	0	434	434
Baizhima_29033	0	818	818
Mishuozhima_02533	0	818	818
Swetha_38629	0	818	818
Yuzhi11_20704	0	818	818
Zhongzhi13_30167	0	818	818
Mishuozhima_01616	1	677	79	483												115
Swetha_02415	3	4088	148	71	116	483										1299	1876	95
Baizhima_01822	1	677	79	483												115
Zhongzhi13_01852	1	677	79	483												115
Mishuozhima_08736	1	749	79	528												142
Swetha_11741	2	44381	79	454	88											142	43618
Baizhima_09246	1	749	79	528												142
Zhongzhi13_06937	1	710	79	489												142
Yuzhi11_04663	2	820	79	387	47											142	165
Baizhima_15301	1	788	82	540												166
Mishuozhima_14976	1	788	82	540												166
Swetha_19664	0	623	623
Yuzhi11_09048	1	788	82	540												166
Zhongzhi13_13505	1	788	82	540												166
Swetha_19667	1	3163	841	540												1782
Baizhima_01854	1	2557	76	453												2028
Yuzhi11_00773	1	2684	76	453												2155
Mishuozhima_01646	5	9089	76	417	237	252	219	167								2047	4051	34	1486	103
SIN_1010767	1	1290	82	453												88
Baizhima_03794	1	750	241	432												77
Mishuozhima_02687	0	674	674
Yuzhi11_04608	1	750	241	432												77
Zhongzhi13_06883	1	750	241	432												77
Swetha_11674	1	642	133	432												77
Swetha_11676	1	591	82	432												77
Swetha_02461	11	8207	82	228	119	98	326	119	122	104	309	514	173	65	plasma-membrane proton-efflux P-type ATPase	88	4096	456	434	104	91	101	87	93	103	295
Baizhima_16737	1	1116	380	338												398
Swetha_04859	1	1188	452	338												398
Yuzhi11_10169	1	1116	380	338												398
Zhongzhi13_15273	1	1116	380	338												398
Mishuozhima_16475	1	1116	380	338												398
Baizhima_16738	0	491	491
Mishuozhima_16476	0	491	491
Zhongzhi13_15274	0	491	491
Baizhima_25571	0	404	404
Mishuozhima_25076	0	404	404
Yuzhi11_17393	0	404	404
Zhongzhi13_26065	0	404	404
Swetha_05854	0	404	404
Swetha_33902	0	404	404
Baizhima_25572	0	392	392
Mishuozhima_25077	0	392	392
Yuzhi11_17394	0	392	392
Zhongzhi13_26066	0	392	392
Swetha_05853	0	392	392
Yuzhi11_01226	0	635	635
Zhongzhi13_02427	0	635	635
Baizhima_02291	0	635	635
Mishuozhima_02121	0	635	635
Swetha_03136	0	635	635
Baizhima_02292	0	563	563
Mishuozhima_02122	0	563	563
Zhongzhi13_02428	0	563	563
Yuzhi11_01227	0	563	563
Swetha_03138	0	563	563
Baizhima_02293	1	2914	560	176												2178
Mishuozhima_02123	0	737	737
Swetha_03139	1	2912	560	176												2176
Yuzhi11_01228	1	2914	560	176												2178
Zhongzhi13_02429	1	2916	560	176												2180
Baizhima_02301	1	1078	18	430												630
Mishuozhima_02131	1	1075	18	430												627
Zhongzhi13_02437	1	1027	18	379												630
Yuzhi11_01236	0	467	467
Baizhima_11813	0	740	740
Yuzhi11_06437	0	740	740
Mishuozhima_11523	0	740	740
Swetha_15001	0	740	740
Zhongzhi13_09570	0	683	683
Mishuozhima_18231	0	752	752
Yuzhi11_11670	0	752	752
Baizhima_18557	0	752	752
Zhongzhi13_17595	0	500	500
Mishuozhima_15589	0	719	719
Zhongzhi13_14299	0	719	719
Yuzhi11_09350	0	719	719
Swetha_20273	0	719	719
Baizhima_15887	0	719	719
Swetha_20272	0	719	719
Baizhima_09335	0	704	704
Yuzhi11_24903	0	704	704
Zhongzhi13_07043	0	704	704
Mishuozhima_08831	0	704	704
Swetha_11899	0	704	704
Swetha_05855	0	425	425
Zhongzhi13_26064	0	710	710
Swetha_33901	0	710	710
Yuzhi11_17392	0	710	710
Mishuozhima_25075	0	710	710
Baizhima_25570	0	710	710
Baizhima_16736	0	767	767
Mishuozhima_16474	0	767	767
Yuzhi11_10168	0	767	767
Zhongzhi13_15272	0	767	767
Swetha_21486	1	5653	335	707	2 AP2											4611
Baizhima_12047	2	3672	3	46	714											1164	1746
Mishuozhima_03111	2	3672	3	46	714											1164	1746
Zhongzhi13_09838	2	3672	3	46	714											1164	1746
Swetha_15360	1	1277	574	216												487
Yuzhi11_06548	0	578	578
Swetha_03899	0	317	317
Baizhima_19354	0	440	440
Mishuozhima_19102	0	440	440
Swetha_25094	0	440	440
Zhongzhi13_18590	0	440	440
Yuzhi11_12343	1	28619	332	182												28105
Baizhima_19356	0	500	500
Mishuozhima_19104	0	500	500
Zhongzhi13_18592	0	500	500
Swetha_25096	0	500	500
Swetha_25102	1	837	451	60												326
Mishuozhima_19105	0	473	473
Swetha_25097	0	473	473
Zhongzhi13_18593	0	473	473
Swetha_25103	2	1128	386	71	77											295	299
Yuzhi11_13843	2	2794	200	642	868											637	447
Zhongzhi13_21210	0	836	836
Baizhima_21476	0	836	836
Mishuozhima_21086	0	836	836
Swetha_04254	0	836	836
Yuzhi11_16281	0	809	809
Zhongzhi13_24308	0	809	809
Swetha_31874	0	809	809
Swetha_22735	0	809	809
Mishuozhima_23699	0	809	809
Baizhima_24126	0	809	809
Baizhima_11811	2	2392	610	60	323											192	1207
Zhongzhi13_09568	2	2392	610	60	323											192	1207
Mishuozhima_11521	1	2396	658	357												1381
Swetha_39151	0	689	689
Yuzhi11_06435	0	689	689
Baizhima_18559	0	647	647
Swetha_23881	0	647	647
Yuzhi11_11672	0	647	647
Mishuozhima_18233	0	647	647
Zhongzhi13_17597	0	647	647
Yuzhi11_06436	0	962	962
Zhongzhi13_09569	0	962	962
Baizhima_11812	0	962	962
Mishuozhima_04393	0	962	962
Swetha_00119	0	962	962
Yuzhi11_11671	0	800	800
Zhongzhi13_17596	0	800	800
Mishuozhima_18232	0	800	800
Baizhima_18558	0	800	800
Swetha_23877	1	12167	343	513												11311
Yuzhi11_09353	1	781	378	325												78
Zhongzhi13_14301	0	764	764
Mishuozhima_15591	0	764	764
Baizhima_15889	0	764	764
Swetha_20276	0	761	761
Baizhima_27695	0	665	665
Mishuozhima_27043	0	665	665
Yuzhi11_19541	0	665	665
Zhongzhi13_28562	0	665	665
Swetha_36738	1	1105	365	8												732
Mishuozhima_02564	0	701	701
Yuzhi11_20658	0	701	701
Baizhima_29002	0	701	701
Swetha_38593	0	701	701
Zhongzhi13_30137	1	802	343	417												42
Baizhima_28542	0	707	707
Mishuozhima_27975	0	707	707
Yuzhi11_20263	0	707	707
Zhongzhi13_29600	0	707	707
Baizhima_29885	0	686	686
Yuzhi11_21145	0	686	686
Zhongzhi13_31185	0	686	686
Mishuozhima_29334	0	686	686
Yuzhi11_20673	0	452	452
Mishuozhima_28467	0	452	452
Baizhima_29001	0	452	452
Zhongzhi13_30136	0	452	452
Swetha_38592	0	452	452
Baizhima_01396	0	989	989
Zhongzhi13_01334	0	989	989
Mishuozhima_01170	0	989	989
Yuzhi11_22967	1	988	160	741												87
Yuzhi11_09644	0	1037	1037
Zhongzhi13_14672	0	1037	1037
Mishuozhima_15934	0	1037	1037
Baizhima_16228	0	1037	1037
Baizhima_11564	0	1205	1205
Mishuozhima_11243	0	1205	1205
Swetha_14615	0	1205	1205
Yuzhi11_06179	0	1205	1205
Zhongzhi13_09287	0	1205	1205
Yuzhi11_11606	0	1118	1118
Zhongzhi13_17525	0	1118	1118
Swetha_23786	0	1118	1118
Mishuozhima_18161	0	1118	1118
Baizhima_18494	0	1118	1118
Baizhima_02568	0	965	965
Zhongzhi13_02701	0	965	965
Mishuozhima_02396	0	965	965
Swetha_03517	0	965	965
Yuzhi11_01497	0	965	965
Baizhima_26041	0	947	947
Swetha_34631	0	947	947
Zhongzhi13_26640	0	947	947
Yuzhi11_17932	0	947	947
Mishuozhima_25500	9	6774	943	243	74	149	81	136	170	104	95	437	AP2+mito chondrial carrier prot (3 no.)			1866	741	277	392	233	92	259	71	411
Yuzhi11_12372	0	731	731
Zhongzhi13_14877	0	713	713
Baizhima_16403	0	731	731
Mishuozhima_16115	0	731	731
Swetha_20975	0	602	602
Baizhima_02440	0	818	818
Mishuozhima_02270	0	818	818
Yuzhi11_01370	0	818	818
Zhongzhi13_02575	0	818	818
Baizhima_11699	0	929	929
Mishuozhima_11405	0	929	929
Swetha_14844	0	929	929
Yuzhi11_06329	0	929	929
Zhongzhi13_09454	0	929	929
Baizhima_06848	0	1037	1037
Mishuozhima_18939	0	1037	1037
Yuzhi11_12192	0	1037	1037
Zhongzhi13_18380	0	1037	1037
Baizhima_23931	0	1139	1139
Mishuozhima_23541	0	1139	1139
Yuzhi11_23120	0	1139	1139
Zhongzhi13_24086	0	1139	1139
Yuzhi11_05613	0	842	842
Zhongzhi13_08043	0	842	842
Mishuozhima_10236	0	842	842
Baizhima_10511	0	842	842
Swetha_28474	36	17974	1229	203	104	65	164	74	154	135	69	127	56	185	92	85	66	66	136	91	66	194	203	25	135	69	127	56	185	92	85	66	66	136	91	66	118	153	872	711	1227	110	90	238	90	818	88	88	101
Swetha_28477	0	836	836
Mishuozhima_21378	0	836	836
Yuzhi11_14336	0	836	836
Zhongzhi13_21545	0	836	836
Baizhima_21734	0	836	836
Yuzhi11_22839	0	1172	1172
Zhongzhi13_04906	0	1172	1172
Mishuozhima_06466	0	1172	1172
Baizhima_06606	0	1172	1172
Swetha_09366	0	1172	1172
Swetha_09370	1	1940	422	281												1237
Yuzhi11_13059	0	1256	1256
Zhongzhi13_19932	0	1256	1256
Swetha_26389	0	1256	1256
Swetha_26388	0	1256	1256
Mishuozhima_20047	0	1256	1256
Baizhima_20366	0	1256	1256
Baizhima_03230	0	812	812
Mishuozhima_04553	0	812	812
Swetha_00307	0	812	812
Yuzhi11_22396	0	812	812
Zhongzhi13_20134	0	812	812
Baizhima_03231	0	782	782
Swetha_26629	1	3822	378	769		AP2 (2 domains)										2675
Mishuozhima_04554	0	782	782
Swetha_00306	0	782	782
Zhongzhi13_20133	0	782	782
Yuzhi11_22397	0	782	782
Mishuozhima_00166	0	470	470
Zhongzhi13_12680	0	470	470
Baizhima_14556	0	470	470
Yuzhi11_19862	1	8299	33	457												7809
Yuzhi11_17670	0	1028	1028
Zhongzhi13_26346	0	1028	1028
Mishuozhima_25299	0	1028	1028
Baizhima_25817	0	1028	1028
Baizhima_01580	0	725	725
Mishuozhima_01344	0	725	725
Yuzhi11_00647	0	725	725
Zhongzhi13_01568	0	725	725
Swetha_04990	0	725	725
Yuzhi11_22734	0	635	635
Zhongzhi13_04635	0	635	635
Swetha_08993	0	635	635
Mishuozhima_06212	0	635	635
Baizhima_03467	0	635	635
Swetha_05085	0	872	872
Zhongzhi13_06890	0	872	872
Mishuozhima_02680	0	872	872
Baizhima_03787	0	872	872
Yuzhi11_05704	0	866	866
Zhongzhi13_08144	0	866	866
Swetha_13359	0	866	866
Mishuozhima_10337	0	866	866
Baizhima_10607	0	866	866
Baizhima_17826	0	638	638
Mishuozhima_17441	0	638	638
Swetha_05110	0	638	638
Yuzhi11_22135	0	638	638
Zhongzhi13_16722	0	638	638
Swetha_22765	1	1013	560	26												427
Baizhima_18345	0	608	608
Mishuozhima_18000	0	608	608
Zhongzhi13_17360	0	599	599
Yuzhi11_11449	0	464	464
Baizhima_11916	5	6884	232	126	356	160	110	1104	AP2+ zinc-binding in reverse transcriptase							1702	98	2086	227	683
Zhongzhi13_09690	0	1094	1094
Yuzhi11_06486	0	1094	1094
Mishuozhima_11633	0	1094	1094
Baizhima_18635	0	1049	1049
Mishuozhima_18331	0	1049	1049
Yuzhi11_11741	0	1049	1049
Zhongzhi13_17725	0	1034	1034
Swetha_24055	0	1034	1034
Baizhima_11945	2	1699	922	57	119											247	354
Mishuozhima_11662	2	1699	922	57	119											247	354
Zhongzhi13_09719	2	1699	922	57	119											247	354
Swetha_15194	0	1022	1022
Yuzhi11_06514	0	1022	1022
Baizhima_01581	2	1655	169	73	1066											184	163
Mishuozhima_01345	2	1655	169	73	1066											184	163
Yuzhi11_00648	2	1655	169	73	1066											184	163
Zhongzhi13_01569	2	1655	169	73	1066											184	163
Swetha_04991	2	1652	169	73	1066											181	163
Baizhima_03468	0	1088	1088
Mishuozhima_06213	0	1088	1088
Swetha_08994	0	1064	1064
Yuzhi11_22735	0	1064	1064
Zhongzhi13_04636	0	1064	1064
Swetha_08985	0	1025	1025
Baizhima_06398	0	1124	1124
Mishuozhima_06235	0	1124	1124
Swetha_09024	0	1124	1124
Yuzhi11_22759	0	1124	1124
Zhongzhi13_04659	0	1124	1124
Mishuozhima_01370	0	1064	1064
Zhongzhi13_01594	0	1064	1064
Swetha_02076	0	1064	1064
Yuzhi11_00672	0	1064	1064
Swetha_02066	0	1064	1064
Baizhima_18041	0	1058	1058
Mishuozhima_17673	0	1058	1058
Swetha_20410	0	1058	1058
Yuzhi11_11075	0	1058	1058
Zhongzhi13_16974	0	1058	1058
Swetha_23066	1	2286	725	50												1511
Swetha_40799	7	2617	246	582	82	88	73	50	76	574						80	112	231	89	98	85	151
Zhongzhi13_31963	7	2617	246	582	82	88	73	50	76	574						80	112	231	89	98	85	151
Mishuozhima_30005	7	2617	246	582	82	88	73	50	76	574						80	112	231	89	98	85	151
Baizhima_00238	7	2617	246	582	82	88	73	50	76	574						80	112	231	89	98	85	151
Yuzhi11_25422	7	2617	246	582	82	88	73	50	76	574						80	112	231	89	98	85	151
Baizhima_23371	7	2883	285	657	82	88	73	50	76	622						110	170	258	83	89	103	137
Mishuozhima_22993	7	2883	285	657	82	88	73	50	76	622						110	170	258	83	89	103	137
Yuzhi11_15749	7	2883	285	657	82	88	73	50	76	622						110	170	258	83	89	103	137
Swetha_30866	7	2883	285	657	82	88	73	50	76	622						110	170	258	83	89	103	137
Swetha_30858	7	2883	285	657	82	88	73	50	76	622						110	170	258	83	89	103	137
Zhongzhi13_23474	7	2883	285	657	82	88	73	50	76	622						110	170	258	83	89	103	137
Baizhima_09780	5	2599	820	82	126	50	76	541								163	400	114	97	130
Mishuozhima_09280	5	2599	820	82	126	50	76	541								163	400	114	97	130
Yuzhi11_05172	5	2599	820	82	126	50	76	541								163	400	114	97	130
Zhongzhi13_07576	5	2599	820	82	126	50	76	541								163	400	114	97	130
Swetha_12618	7	2599	264	483	82	88	73	50	76	541						73	163	264	101	114	97	130
Swetha_12621	8	2720	264	483	17	64	88	73	50	76	541					73	163	122	264	101	114	97	130
Baizhima_05820	7	2787	93	366	82	88	73	50	76	640						140	107	317	117	84	130	424
Mishuozhima_05634	7	2787	93	366	82	88	73	50	76	640						140	107	317	117	84	130	424
Zhongzhi13_03999	7	2784	93	366	82	88	73	50	76	637						140	107	317	117	84	130	424
Swetha_03766	7	2718	93	366	82	88	73	50	76	571						140	107	317	117	84	130	424
Yuzhi11_02483	7	2784	93	366	82	88	73	50	76	637						140	107	317	117	84	130	424
Baizhima_16634	10	7355	8	209	26	36	411	82	88	73	50	76	760	AP2+AP2		1337	785	2075	285	136	219	109	337	150	103
Yuzhi11_10025	10	7219	8	209	26	36	411	82	88	73	50	76	760			1337	653	2073	285	136	219	109	337	150	101
Zhongzhi13_15124	10	7202	8	209	26	36	411	82	88	73	40	354	324	AP2		1358	652	2110	275	136	219	109	337	323	32
Mishuozhima_16334	7	2830	138	411	82	88	73	50	76	760				AP2+AP2		94	136	220	109	348	150	95
Swetha_21316	8	11041	138	411	82	88	73	50	76	715	368			AP2+AP2+Zn finger		94	136	220	109	350	150	95	7886
Mishuozhima_30161	6	3312	502	82	88	73	50	76	448							94	1305	102	92	118	282
Swetha_41017	8	10161	105	104	504	82	88	73	50	76	448			AP2+AP2+Solute carrier families 5 and 6-like		1080	5491	94	1372	102	92	118	282
Baizhima_30706	6	3312	502	82	88	73	50	76	448					Ap2+Ap2		94	1305	102	92	118	282
Yuzhi11_21887	6	3927	147	504	82	88	73	76	448							479	94	1291	102	261	282
Zhongzhi13_32148	6	3927	147	504	82	88	73	76	448					AP2+AP2		479	94	1291	102	261	282
Baizhima_12573	8	3184	270	567	82	8	88	73	50	76	871					111	161	165	134	141	87	208	92
Zhongzhi13_10461	8	3184	270	567	82	8	88	73	50	76	871			AP2+Ap2		111	161	165	134	141	87	208	92
Mishuozhima_12301	8	3181	270	567	82	8	88	73	50	76	871					111	160	165	134	139	87	208	92
Swetha_05159	8	3181	270	567	82	8	88	73	50	76	871					111	160	165	134	139	87	208	92
Yuzhi11_07044	16	mRNA	Exon											alpha/beta hydrolases;+AP2+Ap2						Intron
		14804	222	91	127	135	51	100	179	157	54	53	216	567	144	73	50	76	871	98	1173	137	183	533	443	629	95	268	6855	106	592	139	87	208	92
Swetha_16136	9	4885	151	135	51	100	134	73	50	76	251	613		alpha/beta hydrolases;+AP2+Ap2		136	183	531	1745	139	87	208	92	130
Baizhima_18367	7	3419	90	513	82	88	73	50	76	844				AP2+AP2		358	144	287	101	102	392	219
Yuzhi11_11470	5	2578	312	88	73	50	76	844						AP2+AP2		321	101	102	392	219
Mishuozhima_18017	7	3416	90	513	82	88	73	50	76	844						358	143	287	101	100	392	219
Zhongzhi13_17382	6	3395	90	513	82	88	73	50	76					AP2+AP2		844	358	120	287	101	102	392	219
Swetha_23592	5	3488	90	513	82	88	114	844						AP2+AP2		358	211	287	682	219
Swetha_23589	2	2641	65	114	844									Ap2		1399	219
Baizhima_01880	12	8025	157	82	88	73	50	76	438	6	513	83	220	128	314	89	468	93	147	846	1124	443	1111	90	379	446	561
Mishuozhima_01681	12	8025	157	82	88	73	50	76	438	6	513	83	220	128	314	89	468	93	147	846	1124	443	1111	90	379	446	561
Swetha_02512	12	8025	157	82	88	73	50	76	438	6	513	83	220	128	314	89	468	93	147	846	1124	443	1111	90	379	446	561
Yuzhi11_00808	12	8025	157	82	88	73	50	76	438	6	513	83	220	128	314	89	468	93	147	846	1124	443	1111	90	379	446	561
Zhongzhi13_01920	12	8025	157	82	88	73	50	76	438	6	513	83	220	128	314	89	468	93	147	846	1124	443	1111	90	379	446	561
Baizhima_05663	5	2299	148	82	111	50	76	532								91	249	516	260	184
Swetha_07942	11	10077	223	82	111	50	76	342	224	82	111	50	76	532	AP2(4 dom)	91	249	639	260	184	5395	91	249	516	260	184
Mishuozhima_05483	5	2299	148	82	111	50	76	532								91	249	516	260	184
Yuzhi11_02342	5	2299	148	82	111	50	76	532								91	249	516	260	184
Zhongzhi13_03834	5	2299	148	82	111	50	76	532						AP2+AP2		91	249	516	260	184
Swetha_08528	6	1902	241	82	88	73	50	76	583							92	225	88	82	120	102
Zhongzhi13_04281	6	1902	241	82	88	73	50	76	583							92	225	88	82	120	102
Mishuozhima_05883	6	1902	241	82	88	73	50	76	583							92	225	88	82	120	102
Baizhima_06070	6	1902	241	82	88	73	50	76	583							92	225	88	82	120	102
Yuzhi11_02708	6	1902	241	82	88	73	50	76	583							92	225	88	82	120	102
Baizhima_19229	5	1246	279	88	73	50	76	82								240	82	86	100	90
Mishuozhima_18999	5	1246	279	88	73	50	76	82								240	82	86	100	90
Swetha_24927	5	1246	279	88	73	50	76	82								240	82	86	100	90
Yuzhi11_12227	5	1246	279	88	73	50	76	82								240	82	86	100	90
Zhongzhi13_18440	5	1246	279	88	73	50	76	82								240	82	86	100	90
Swetha_31547	5	1769	297	88	73	50	76	562								235	92	110	96	90
Yuzhi11_23062	5	1769	297	88	73	50	76	562								235	92	110	96	90
Swetha_31543	5	1769	297	88	73	50	76	562								235	92	110	96	90
Mishuozhima_23482	5	1769	297	88	73	50	76	562						AP2+AP2		235	92	110	96	90
Baizhima_23871	5	1162	237	42	11	124	45	30						AP2+AP2		235	92	110	96	90
Zhongzhi13_24026	5	1769	297	88	73	50	76	562								235	92	110	96	90
Baizhima_08704	7	3394	219	567	82	88	73	50	76	568				AP2+AP2		146	112	239	98	93	612	371
Mishuozhima_08252	7	3394	219	567	82	88	73	50	76	568						146	112	239	98	93	612	371
Yuzhi11_04173	7	3394	219	567	82	88	73	50	76	568						146	112	239	98	93	612	371
Zhongzhi13_06339	8	3425	219	567	82	88	73	50	76	273	213			AP2+AP2		146	112	239	98	93	612	371	113
Swetha_10977	7	3412	225	567	82	88	73	50	76	568				AP2+AP2		142	112	239	97	93	629	371
Baizhima_10330	6	6128	246	82	124	35	103	149	421							121	1021	206	481	3092	47
Mishuozhima_01934	5	6128	246	82	124	35	103	616								121	1021	206	481	3093
Yuzhi11_00959	4	6163	246	82	157	76	616									121	1020	749	3096
Zhongzhi13_02194	4	6185	246	82	157	76	616									121	1021	749	3117
Swetha_02835	20	30444	246	82	124	76	612	294	1238	83	149	47	66	612	294	1238	83	149	79	98	69	43	108	121	1044	749	2586	2607	472	124	377	1214	1990	385	2436	472	124	254	1214	3210	157	151	4967
Swetha_33069	7	6851	217	82	88	124	76	595	89	281						249	788	634	684	2281	612	51
Swetha_33068	3	3290	3	124	76	613										550	684	1241
Yuzhi11_17013	5	5835	217	82	88	124	76	613								249	787	634	684	2281
Zhongzhi13_25401	7	6851	217	82	88	124	76	595	89	281						249	788	634	684	2281	612	51
Baizhima_25029	7	6851	217	82	88	124	76	595	89	281						249	788	634	684	2281	612	51
Mishuozhima_24551	7	6851	217	82	88	124	76	595	89	281						249	788	634	684	2281	612	51
Baizhima_29293	6	2236	223	82	88	73	50	61	658							225	263	164	72	163	114
Mishuozhima_28717	6	2236	223	82	88	73	50	61	658							225	263	164	72	163	114
Swetha_39000	6	2236	223	82	88	73	50	61	658							225	263	164	72	163	114
Zhongzhi13_30427	6	2217	223	82	88	73	50	61	658							225	244	164	72	163	114
Yuzhi11_13872	6	2230	217	82	88	73	50	61	658							225	263	164	72	163	114
Baizhima_04246	8	3236	499	25	30	87	145	103	118	122	263					160	103	102	152	729	117	161	320
Mishuozhima_21482	8	3236	499	25	30	87	145	103	118	122	263					160	103	102	152	729	117	161	320
Swetha_28613	8	3238	499	25	30	87	145	103	118	122	263					162	103	102	152	729	117	161	320
Yuzhi11_14439	8	3236	499	25	30	87	145	103	118	122	263					160	103	102	152	729	117	161	320
Zhongzhi13_21657	8	3236	499	25	30	87	145	103	118	122	263					160	103	102	152	729	117	161	320
Baizhima_06882	4	2309	151	44	103	319	269									215	87	305	816
Swetha_29014	7	3257	58	87	145	44	103	121	107	269						85	724	215	87	305	91	816
Mishuozhima_12226	8	3283	541	25	30	87	145	44	103	130	224					346	141	114	73	213	109	98	860
Zhongzhi13_10370	8	3283	541	25	30	87	145	44	103	130	224					346	141	114	73	213	109	98	860
Baizhima_12504	8	3283	541	25	30	87	145	44	103	130	224					346	141	114	73	213	109	98	860
Yuzhi11_06982	8	3061	319	25	30	87	145	44	103	130	224					346	141	114	73	213	109	98	860
Swetha_16019	8	3061	319	25	30	87	145	44	103	130	224					346	141	114	73	213	109	98	860
Swetha_16020	8	3093	250	25	30	87	145	44	103	130	224					346	141	114	73	213	109	98	961
Mishuozhima_30931	6	2993	526	25	30	305	79	130	152							435	167	91	354	108	591
Swetha_41771	6	2993	526	25	30	305	79	130	152							435	167	91	354	108	591
Zhongzhi13_33595	6	2993	526	25	30	305	79	130	152							435	167	91	354	108	591
Zhongzhi13_33551	7	2987	526	25	30	87	145	79	130	152						435	166	91	73	354	108	586
Yuzhi11_11424	7	2987	526	25	30	87	145	79	130	152						435	166	91	73	354	108	586
Baizhima_31489	7	2991	526	25	30	87	86	102	130	152						435	167	91	73	388	108	591
Baizhima_23621	7	2808	529	119	87	145	44	100	451	197						119	155	228	366	85	99	84
Mishuozhima_23248	7	2687	529	119	87	145	44	100	451	197						119	155	228	245	85	99	84
Zhongzhi13_23742	7	2711	529	119	87	145	44	100	451	197						119	155	228	269	85	99	84
Yuzhi11_21770	8	2744	502	59	87	145	44	91	163	194	236					54	233	253	183	159	173	79	89
Zhongzhi13_32014	8	2745	502	59	87	145	44	91	163	194	236					54	234	253	183	159	173	79	89
Swetha_40862	8	2745	502	59	87	145	44	91	163	194	236					54	234	253	183	159	173	79	89
Mishuozhima_30032	8	2745	502	59	87	145	44	91	163	194	236					54	234	253	183	159	173	79	89
Baizhima_30581	8	2745	502	59	87	145	44	91	163	194	236					54	234	253	183	159	173	79	89
Yuzhi11_08258	9	3019	505	25	30	87	145	44	103	139	110	248				501	103	100	95	154	120	90	134	286
Zhongzhi13_12386	12	9239	70	298	318	506	25	30	87	145	44	103	139	110	248	640	4236	657	501	103	100	95	154	120	90	134	286
Swetha_18219	7	2932	418	87	145	44	178	139	110	248						759	95	154	45	90	134	286
Baizhima_14285	9	3019	505	25	30	87	145	44	103	139	110	248				501	103	100	95	154	120	90	134	286
Mishuozhima_13998	9	2932	418	25	30	87	145	44	103	139	110	248				501	103	100	95	154	120	90	134	286
Swetha_18222	10	6429	42	30	87	145	44	42	110	244	21	999	739			176	100	95	154	120	152	286	481	2210	152
Mishuozhima_21323	6	3527	144	59	130	84	174	121	115							991	170	700	646	94	99
Zhongzhi13_21493	6	3527	144	59	130	84	174	121	115							991	170	700	646	94	99
Baizhima_03395	6	3526	144	59	130	84	174	121	115							987	171	700	646	96	99
Yuzhi11_14286	6	6284	162	59	130	84	174	121	115							3730	170	700	646	94	99
Swetha_28399	14	11329	142	54	97	314	1053	119	152	53	163	19	130	84	174	121	115	107	77	95	196	107	97	3289	2000	819	211	700	646	96	99
Mishuozhima_21609	5	2408	42	130	84	174	121	112								140	1152	201	161	91
Swetha_28864	5	2408	42	130	84	174	121	112								140	1152	201	161	91
Baizhima_21990	5	2408	42	130	84	174	121	112								140	1152	201	161	91
Yuzhi11_14632	5	2397	42	130	84	174	121	112								140	1145	197	161	91
Zhongzhi13_21859	5	2397	42	130	84	174	121	112								140	1145	197	161	91
Swetha_28866	6	3987	66	174	121	197	113	104	64							201	161	1449	246	962	129
[truncated: 27 more columns]

## Sheet: AP2_AS
SI-5 The splice variants of AP2/ERF genes in sesame pan-genome represented as homologous sets based on phylogeny. The AS events are identified based of SD, SA, BS location in the genome and sequence variation to the common sequence.The splice factors are also represented
Homolog_sets	AP2/ERF Gene	Main AS events	Factor responsible	spl.donor	score	spl.acceptor	score	branch_site	score	SRSF1	SRSF1 (IgM-BRCA1)	SRSF2	SRSF5	SRSF6	Score_SF1	Score_IgM-BRCA1	Score_SF2	Score_SF5	Score_SF6
1	Swetha_03929	Alternative 5' splice site	Mutation in splice acceptor	14	5.4371	1132	9.4216	1095	5.8922	567	788	834	836	399	5.73874	5.4912	5.7484	5.40993	4.2491
2	Yuzhi11_12060			428	8.0994	1096	9.4216	1059	5.8922	531	752	798	800	363	5.73874	5.4912	5.7484	5.40993	4.2491
3	Zhongzhi13_18090			350	8.0994	1018	9.4216	981	5.8922	453	674	720	722	285	5.73874	5.4912	5.7484	5.40993	4.2491
4	Swetha_24518			410	4.4772	808	9.4216	771	5.8922	243	464	510	512	75	5.73874	5.4912	5.7484	5.40993	4.2491
1	Swetha_05899	Intron gain by gene fusion,	mutation in SF2&5	173	7.4006	396	10.5809	503	6.7379	317	317	426	201	114	6.14187	5.69913	4.6787	4.27537	6.13588
2	Yuzhi11_19341		Change in BS, mutation in SF2&5	173	7.4006	396	10.5809	359	6.1448	317	317	160	201	114	6.14187	5.69913	4.6178	4.27537	6.13588
3	Swetha_00824		intron gain by gene fusion; mutation in SF2&5	944	7.4006	1167	10.5809	1274	6.7379	1088	1088	476	147	885	6.14187	5.69913	4.94402	5.08782	6.13588
1	Zhongzhi13_06212	intron gain, alternative 5'splice site	Mutation in SD	528	6.2834	327	10.0323	46	5.4135	521	521	219	513	530	5.16885	4.8825	5.19313	4.95151	5.16198
2	Swetha_10826		Mutation in SD, intron gain	484	4.8256	318	10.0323	37	5.4135	512	512	210	504	521	5.16885	4.8825	5.19313	4.95151	5.16198
1	Swetha_17617	intron gain, alternative 5'splice site	New Splice donor, New branch sites	425; 23	8.9928; 8.1293	1007	8.4002	788; 102;352	7.745; 6.5599; 5.1449	504	944	726	951	837	5.73874	5.4912	4.90954	5.461	6.13588
2	Zhongzhi13_11895			137	8.9928	719	8.4002	500	7.745	216	656	438	663	549	5.73874	5.4912	4.90954	5.461	6.13588
1	Baizhima_15884	Intron gain, alternative 3' and 5' splice sites	Mutn in SD, SA, BS & all trans factors	1078	7.233	540	10.8093	110	6.2788	327	1127	1033	608	1153	5.73874	5.0854	5.52935	5.39988	4.71335
2	Swetha_20270			670	7.233	132	10.8093	441	5.3172	356	719	625	200	745	4.86363	5.0854	5.52935	5.39988	4.71335
3	Baizhima_07127			424	6.2445	267	6.616	459	4.553	245	350	463	479	266	6.34286	5.10994	5.04946	5.0314	5.30513
1	Baizhima_01209	Alternative exon ends, alt 3' splice site	Mutation in SA, SF1&SF2	61	8.3235	39	9.2513	8	6.336	263	49	145	285	12	6.58909	5.4912	4.45628	5.27713	4.69647
2	Zhongzhi13_01108		Mutation in SA, SF1&SF2	61	8.3235	39	9.109	8	6.336	263	263	234	285	12	6.14187	5.69913	4.78839	5.27713	4.69647
1	Zhongzhi13_17646	intron gain poss by transposon insertion	intron gain , no change in seq	196	10.7108	11	7.7808	27	6.8305	281	281	533	776	176	6.14187	5.69913	5.17947	6.01235	5.32201
2	Swetha_23957			196	10.7108	11	7.7808	27	6.8305	281	281	533	776	176	6.14187	5.69913	5.17947	6.01235	5.32201
1	Baizhima_11675	Alternative 3' splice site, Alternative exon ends . Intron gain	mut in SA	157	8.0405	376	4.9166	77	6.5876	536	551	3	239	155	5.73874	5.0854	5.7484	3.93383	4.93989
2	Yuzhi11_06305			157	8.0405	262	8.7772	77	6.5876	300	300	3	239	456	5.53775	5.4912	5.7484	3.93383	5.52722
1	Swetha_01481	Alternative 5' splice site, Alternative exon ends . Intron gain	mut in SD	418	8.5633	198	6.4194	341	6.1448	77	77	309	269	23	5.29152	5.10994	4.6787	5.35003	5.16198
2	Zhongzhi13_01115		mut in SD	484	8.7023	198	6.4194	341	6.1448	77	77	309	269	23	5.29152	5.10994	5.32314	5.35003	5.16198
1	Swetha_20564	Alternative 5' splice site, Alternative exon ends . Intron gain	mut in SD	515	9.9436	207	9.0883	51	7.3351	764	764	363	164	240	5.89564	5.31787	5.32314	5.44452	4.71335
2	Baizhima_16099		mut in SD	515	9.6031	207	9.0883	51	7.3351	707	707	363	164	240	5.89564	5.31787	5.32314	5.44452	4.71335
1	Mishuozhima_12028	Intron gain, alternative 3' and 5' splice sites		171	10.7863	419	10.0044	207	5.9959	115	247	270	326	477	5.5424	5.10994	4.89264	4.81945	5.32201
2	Zhongzhi13_10152		New SD at pos 770.	261	10.7863	509	10.0044	297	5.9959	115	337	360	416	567	5.5424	5.10994	4.89264	4.81945	5.32201
3	Swetha_15741		mut in SD & SA	9	10.3929	257	9.9995	45	5.9959	85	85	108	164	315	5.29152	5.10994	4.89264	4.81945	5.32201
1	Baizhima_14217	Intron gain, alternative 3' and 5' splice sites	mut in SD, BS	340	6.9648	276	10.2271	477	5.8234	12	12	126	228	330	4.99142	4.78717	4.89264	4.7093	5.32201
2	Zhongzhi13_12318		mut in SD, BS	317	6.9733	279	10.2271	230	5.5549	12	12	129	231	333	4.99142	4.78717	4.89264	4.7093	5.32201
3	Swetha_18147		mut in SD, BS all SR protein	2135	8.5388	276	10.2271	1973	5.8932	2250	2250	2160	1582	630	5.73874	4.81171	5.65189	5.72198	5.52722
1	Baizhima_05006	Intron gain, alternative 5' splice sites		899	9.1386	271	9.426	702	6.5876	409	687	309	555	300	5.61608	5.29333	5.24252	5.72198	4.21894
2	Yuzhi11_01813		mut in SD & SF6	1048	9.5641	271	9.426	702	6.5876	409	687	309	555	1021	5.61608	5.29333	5.24252	5.72198	4.71335
3	Zhongzhi13_03050			782	9.1386	271	9.426	702	6.5876	409	687	309	555	300	5.61608	5.29333	5.24252	5.72198	4.21894
1	Mishuozhima_05384	Intron gain, alternative 3' and 5' splice sites	mutn in SD & SA	105	7.5741	21	6.255	246	4.9996	74	74	318	73	18	5.98497	5.19298	5.3348	5.27478	5.52722
2	SIN_1005434			313	7.8201	340	8.5309	246	4.9996	74	74	318	73	18	5.98497	5.19298	5.3348	5.27478	5.52722
1	Baizhima_30580	Intron gain, alternative 5' splice sites	mutn in SD; SF1, SF2 & SF5	304	10.5041	17	8.8519	132	4.722	314	186	448	450	89	5.3855	5.29333	5.38755	5.40993	4.34811
2	Zhongzhi13_32012			149	7.8995	149	8.8519	264	4.722	190	159	292	312	221	5.29152	5.26351	4.76024	4.43215	4.34811
1	Yuzhi11_22408	Alternative exon ends, alt 3' splice site	mutn in SA	232	5.5249	598	7.289	600	6.317	177	122	319	74	185	5.73874	5.0854	4.74781	5.75657	5.32201
2	Swetha_26615			241	5.5249	607	7.0958	609	6.317	186	131	328	74	194	5.73874	5.0854	4.74781	5.75657	5.32201
1	Swetha_11540	Intron gain by gene fusion,	New BS at pos 29, 48, 203, 226, 280, 308	1050	6.8441	1105	8.229	621	6.8305	460	460	1128	1165	822	5.41508	5.26377	4.8139	5.19879	4.93989
2	Swetha_11545			678	6.8441	733	8.229	249	6.8305	88	88	756	793	450	5.41508	5.26377	4.8139	5.19879	4.93989
1	Mishuozhima_25363	Exon skipping, alternative exon ends		269	10.1291	446	4.8695	21	5.7122	62	62	588	483	442	5.98497	5.19298	4.83685	5.48177	5.52722
2	Yuzhi11_17733			269	10.1291	446	4.8695	21	5.7122	62	62	588	483	442	5.98497	5.19298	4.83685	5.48177	5.52722
3	Swetha_34339			218	10.1291	395	4.8695	21	5.7122	62	62	537	432	391	5.98497	5.19298	4.83685	5.48177	5.52722
4	Baizhima_25882		Change in BS & SF1	53	10.1291	230	4.8695	188	5.6555	41	41	372	267	226	5.34931	4.61383	4.83685	5.48177	5.52722
1	Zhongzhi13_01706	Intron gain by gene fusion	Mutn in SD, SF1 & SF5	502	9.0854	818	7.4831	996	7.1551	212	212	393	965	735	5.89564	5.31787	5.32314	5.25713	5.52722
2	Swetha_02245			152	9.7932	800	7.4831	978	7.1551	119	1462	1479	1306	717	6.34286	5.06563	5.32314	5.75657	5.52722
1	Swetha_02415	Intron retention, alt 3' splice site	Mutn in SA, SF5, SF6	713	8.7515	328	7.0082	560	6.7379	374	374	286	80	224	5.29152	5.10994	4.4918	6.07868	5.16198
2	Zhongzhi13_01852			455	8.7515	526	5.2102	302	6.7379	116	116	46	39	471	5.29152	5.10994	4.4918	5.72198	4.71335
1	Swetha_11741	Intron retention, alt5' splice site	Mutn in SD	539	9.4641	279	8.1181	332	7.4257	21	116	406	39	367	5.3855	5.10994	4.38696	5.72198	4.08781
2	Baizhima_09246			521	9.4641	279	8.1181	332	7.4257	21	116	406	39	367	5.3855	5.10994	4.38696	5.72198	4.08781
3	Zhongzhi13_06937			482	9.2856	279	8.1181	332	7.4257	21	116	406	39	367	5.3855	5.10994	4.38696	5.72198	4.08781
4	Yuzhi11_04663			76	5.9755	279	8.1181	332	7.4257	21	116	406	39	367	5.3855	5.10994	4.38696	5.72198	4.08781
1	Swetha_19664	Intron retention, alt 3' splice site		377	8.8673	239	6.5513	259	5.9828	24	24	210	577	591	5.3855	4.58402	5.38755	5.10431	4.71335	Single exon divided into two, no change in cis &trans factors
2	Swetha_19667		Mutn in SA, BS, SF1, SF5 &SF6	1136	8.8673	499	7.5559	155	8.0156	896	243	969	411	112	4.27907	3.7061	5.38755	5.44452	4.91856
3	Zhongzhi13_13505			377	8.8673	239	6.5513	259	5.9828	24	24	210	577	591	5.3855	4.58402	5.38755	5.10431	4.71335
1	Baizhima_01854	Intron retention, alt 3' and 5' splice site	Mutn in SD, SA, SF5, SF6	292	8.1947	11	10.5485	66	6.2788	113	113	160	69	187	5.29152	5.10994	4.85961	5.76662	4.10469
2	Mishuozhima_01646			1315	8.8424	1307	11.1889	66	6.2788	113	113	160	970	916	5.29152	5.10994	4.85961	6.07868	5.52722
3	SIN_1010767		Mutn in SA, BS, SF5 &SF6	298	8.1947	183	7.1401	198	5.9071	119	119	166	42	193	5.29152	5.10994	4.85961	5.72198	4.10469
1	Baizhima_03794	Intron retention, alt 3' splice site	Mutn in SA, SF2 & SF5	551	12.2976	28	12.1468	513	7.4934	359	359	42	37	322	6.14187	5.69913	4.66931	5.27713	5.32201
2	Mishuozhima_02687			551	12.2976	28	12.1468	513	7.4934	359	359	42	37	322	6.14187	5.69913	4.66931	5.27713	5.32201
3	Swetha_11674			443	12.2976	349	3.2459	405	7.4934	251	251	217	408	214	6.14187	5.69913	4.0782	4.93503	5.32201
4	Swetha_11676			392	12.2976	298	3.2459	354	7.4934	200	200	166	357	163	6.14187	5.69913	4.0782	4.93503	5.32201
5	Swetha_02461		Mutn in SA, BS, all trans factors	1885	7.3829	1184	7.5335	1808	6.3211	616	616	406	1346	556	5.98497	5.19298	4.97865	6.3244	5.52722
1	Baizhima_16737	Alternative exon ends, alt 3' splice site	Mutn in SA	247	10.4926	283	6.5043	509	4.9	149	9	687	234	698	5.73874	5.4912	4.5433	6.01235	5.16198
2	Swetha_04859			319	10.4926	209	8.7693	581	4.9	149	149	759	306	770	5.73874	4.81171	4.5433	6.01235	5.16198
1	Baizhima_02293	Intron gain		448	7.8889	518	5.7324	620	6.8305	186	186	319	88	580	5.29152	5.10994	5.19771	6.07868	6.13588
2	Mishuozhima_02123			448	7.8889	518	5.7324	620	6.8305	186	186	319	88	580	5.29152	5.10994	5.19771	6.07868	6.13588
1	Baizhima_02301	Intron gain, alt 3' splice site	Presence of additional two BS & a SA	106	9.5806	62	1.8775	259	5.8234	261	397	162	71	219	5.46656	5.29333	4.45089	3.40596	5.32201
2	Zhongzhi13_02437			106	9.5806	62	1.8775	259	5.8234	261	359	162	71	219	5.46656	5.29333	4.45089	3.40596	5.32201
3	Yuzhi11_01236		Presence of additional two BS & a SA	124	9.5806	80	1.8775	277	5.8234	279	415	180	89	237	5.46656	5.29333	4.45089	3.40596	5.32201
1	Baizhima_16736	Intron gain by gene fusion; alternative 3' and 5' splice sites	BS at 8, 14&18. mutn in SD&SA	229	8.1358	166	5.7634	96	6.3021	501	501	142	381	499	5.29152	5.10994	4.76563	4.30353	4.95677
2	Swetha_21486		BS at 372, 420&480. mutn in SD&SA	202	8.1358	139	5.7634	69	6.3021	777	777	115	657	775	5.29152	5.10994	4.76563	4.30353	4.95677
1	Baizhima_12047	Exon skipping, alternative exon ends	new SA,mutn in BS	409	6.9835	463; 184	4.1818; 3.9581	152	6.0505	625	361	747	441	252	5.73874	5.4912	4.88167	4.84054	4.95677
2	Swetha_15360		mutn in BS	223	6.9835	277	4.1818	564	5.3023	439	175	561	255	66	5.73874	5.4912	4.88167	4.84054	4.95677
3	Yuzhi11_06548			223	6.9835	277	4.1818	564	5.3023	439	175	561	255	66	5.73874	5.4912	4.88167	4.84054	4.95677
4	Swetha_03899		mutn in BS, mutn in SF2	223	6.9835	277	4.1818	144	4.1321	175	175	34	255	66	5.53775	5.4912	4.76563	4.84054	4.95677
1	Zhongzhi13_18590	Intron gain, Alternative exon ends, alt 3' splice site	new SA,mutn in in SF2, SF5 & SF6	93; 70	5.9571; 6.0133	236; 21	6.9599; 6.7249	60	6.328	173	173	301	285	76	5.73874	4.81171	3.96065	5.16971	4.91856
2	Yuzhi11_12343		mutn in in SF2, SF5 & SF6	63;40	5.9571; 6.0133	206	6.9599	30	6.328	143	143	500	411	339	5.73874	4.81171	4.46875	5.75657	4.95677
1	Swetha_25096	Intron gain, Alternative exon ends	mutn in SF1, SF2, SF5 & SF6	100	6.4142	16	6.2731	266	6.1448	387	124	435	315	106	5.01178	4.68436	3.92287	5.16971	4.91856
2	Swetha_25102			100	6.4142	16	6.2731	266	6.1448	387	124	435	315	106	4.54885	4.68436	4.99108	5.75657	4.95677
1	Swetha_25097	Exon skipping, alternative exon ends	mutn in SF1, SF2, SF5 & SF6	91	5.3596	51	5.459	351	6.2406	115	115	75	354	282	5.01178	4.68436	3.92287	5.16971	4.91856
2	Swetha_25103			91	5.3596	51	5.459	351	6.2406	115	115	75	354	531	4.54885	4.68436	4.99108	5.75657	5.77064
1	Yuzhi11_13843	Exon skipping, Alternative 5' splice site	mutn in SD, BS , SF5, SF6	692	9.9057	1492	10.7448	550	8.0156	1502	1502	1315	622	841	5.53775	5.4912	5.44637	4.91394	5.16198
2	Zhongzhi13_21210			215	6.2846	616	10.7448	137	5.8742	626	626	439	567	426	5.53775	5.4912	5.44637	4.86409	4.95677
1	Baizhima_11811	Exon skipping, alternative exon ends	mutn in BS, SF5	128	9.8895	335	9.9214	117	5.3099	920	920	776	667	805	5.29152	5.10994	5.04798	5.08782	6.13588
2	Mishuozhima_11521			128	9.8895	335	9.9214	693	5.5528	941	941	797	212	826	5.29152	5.10994	5.04798	4.96507	6.13588
3	Swetha_39151		mutn in SF1, SF2, SF5 & SF6	128	9.8895	335	9.9214	117	5.3099	426	603	474	212	462	5.01196	5.0854	4.99108	4.96507	4.95677
1	Swetha_23877	Intron gain, alternative 5' splice sites	new SD at pos 316	403	9.1209	245	5.9694	132	5.6889	5	5	159	321	444	5.14832	5.29333	5.10072	6.01235	4.49126
2	Baizhima_18558			322	9.1209	251	5.9694	138	5.6889	11	11	165	327	363	5.14832	5.29333	5.10072	6.01235	4.49126
1	Yuzhi11_09353	Intron gain, alternative 5' splice sites	mutn in SD& SF2	286	9.3076	142	12.7919	644	6.7379	152	152	528	685	44	5.18451	5.26351	4.53087	5.12507	5.52722
2	Zhongzhi13_14301			376	9.3639	142	12.7919	704	6.7379	152	152	588	745	44	5.18451	5.26351	4.53087	5.12507	5.52722
3	Swetha_20276			373	9.3639	142	12.7919	701	6.7379	152	152	294	742	44	5.18451	5.26351	5.55398	5.12507	5.52722
1	Baizhima_27695	Intron gain, alternative 5' splice sites	mutn in SD, SF1	533	7.2675	297	6.9443	348	6.328	457	650	312	66	180	4.62253	4.8577	5.57638	5.65565	5.77064
2	Swetha_36738			4	6.793	297	6.9443	348	6.328	238	238	312	66	180	4.11978	4.33615	5.57638	5.65565	5.77064
1	Swetha_38593	Intron gain, Alternative 3' splice site	Mutn in SA, SF5	75	9.952	221	12.206	377	6.0447	239	155	27	423	591	5.5424	5.10994	5.04798	4.55724	5.32201
2	Zhongzhi13_30137			75	9.952	322	12.9954	437	6.0447	239	155	27	278	651	5.5424	5.10994	5.04798	4.81945	5.32201
1	Baizhima_01396	Intron gain, Alternative 5' splice site	Mutation of SD at 248	891	7.9365	623	7.7507	153	7.4934	461	461	111	113	291	5.29152	5.10994	5.1685	5.15415	6.13588
2	Yuzhi11_22967		2 new BS at pos 782&159; mut of SD at 161	804	7.9365	536	7.7507	153	7.4934	374	374	111	113	204	5.29152	5.10994	5.1685	5.15415	6.13588
1	Baizhima_26041	Intron gain by gene fusion, Alternative exon ends	Mutn in SD, SA & BS; Mutn in SF2&SF6	223	9.7355	813	8.0469	830	5.9071	223	813	223	813	830	5.73874	4.81171	4.90954	5.50286	5.30513
2	Mishuozhima_25500			1399	13.1008	1721	11.5246	1550	6.7452	1399	1721	1399	1721	1550	5.73874	4.81171	5.32314	5.50286	5.52722
1	Swetha_20975	Alternative 3' splice site	Mutn in SA	7	6.0583	425	8.1808	428	6.5876	67	67	222	501	168	4.99142	4.78717	4.90954	5.25713	3.75343
2	Zhongzhi13_14877			7	6.0583	174	11.3715	539	6.5876	67	67	351	612	297	4.99142	4.78717	4.90954	5.25713	3.75343
1	Swetha_28474	Intron gain by gene fusion; alternative 3' and 5' splice sites	Mutn in SD, SA & BS; Mutn in all SF	2474	10.9606	1525	10.6944	77	6.5727	1988	1988	2064	254	1711	6.34286	5.01964	5.97924	5.77306	5.52722
2	Swetha_28477			82	7.6135	619	8.1632	358	6.1448	240	240	265	42	454	6.58909	5.40091	5.80398	5.17615	4.71335
1	Swetha_09366	Intron retention, alternative exon ends	Mutn in BS; SF5&SF6	168	10.216	49	9.5764	756	7.4934	208	248	104	942	1140	6.34286	5.10994	5.88273	5.50286	4.71335
2	Swetha_09370			168	10.216	49	9.5764	32	7.4257	208	248	104	240	358	6.34286	5.10994	5.88273	5.19724	4.69647
1	Swetha_26629	Intron gain by gene fusion; alternative 3' splice sites	New BS at pos 313-360; new SA at 352	477	10.8599	757	8.3431	903	7.745	200	200	247	944	198	5.29152	5.10994	5.19771	5.75657	4.95677
2	Swetha_00306			111	10.8599	391	8.3431	537	7.745	191	191	238	578	129	5.29152	5.10994	5.19771	5.75657	4.49126
1	Zhongzhi13_12680	Intron retention, alternative exon ends	Mutn in BS; SRSF1 (IgM-BRCA1	96	9.5456	52	3.5676	15	4.6891	173	173	130	170	294	5.34931	4.61383	4.60656	4.43215	5.77064
2	Yuzhi11_19862			117	9.5456	73	3.5676	35	5.8742	194	47	151	191	315	5.34931	5.06563	4.60656	4.43215	5.77064
1	Swetha_05110	Intron gain, Alternative 5' splice site	New BS at 582-620; new SD at 599	25	10.8363	541	7.5908	264	7.745	569	246	181	307	128	4.99607	5.06563	5.57638	4.92043	5.32201
2	Swetha_22765			13	10.8363	529	7.5908	252	7.745	557	234	169	295	116	4.99607	5.06563	5.57638	4.92043	5.32201
1	Baizhima_18345	Alternative exon ends, alt 5' splice site	Mutn in SD, BS & SF2	62	9.4934	361	7.139	491	5.3099	371	371	70	370	178	5.63173	4.96529	5.42855	6.3244	4.49126
2	Zhongzhi13_17360			62	10.1201	361	7.139	63	6.317	371	371	70	370	178	5.63173	4.96529	5.42855	6.3244	4.49126
3	Yuzhi11_11449			57	7.3583	226	7.139	347	5.3099	236	236	186	235	43	5.63173	4.96529	4.4003	6.3244	4.49126
1	Baizhima_11916	Intron gain by gene fusion; alternative 3' splice sites	Mutn in SA, BS & SF1, SRSF1 (IgM-BRCA1), SF2	1849	9.8435	13	10.63	114	6.0505	132	132	292	1047	1464	6.58909	5.40091	4.64659	5.70673	6.13588
2	Mishuozhima_11633			850	9.8435	228	6.3098	452	5.9959	240	240	351	48	465	5.3855	4.58402	4.41562	5.70673	6.13588
1	Baizhima_18635	Alternative exon ends	Transcript variant	173	8.1931	377	7.1388	1029	7.745	923	923	150	219	143	6.23585	5.17321	6.22082	6.01235	5.77064
2	Swetha_24055			158	8.1931	362	7.1388	1014	7.745	908	908	135	204	128	6.23585	5.17321	6.22082	6.01235	5.77064
1	Baizhima_11945	Intron gain, Alternative 5' splice site	Mutn in SD, SF2	218	11.3162	511	10.3615	603	7.3351	302	302	582	829	330	5.29152	5.10994	4.7933	5.77306	4.71335
2	Swetha_15194			152	8.8501	511	10.3615	603	7.3351	302	302	944	829	330	5.29152	5.10994	5.55398	5.77306	4.71335
1	Baizhima_03468	Alternative exon ends	Transcript variant	314	8.3876	539	6.994	638	7.764	431	431	555	420	606	4.61622	4.38046	4.89264	4.60188	5.52722
2	Swetha_08994			314	8.3876	539	6.994	638	7.764	431	431	555	420	606	4.61622	4.38046	4.89264	4.60188	5.52722
3	Swetha_08985			314	8.3876	539	6.994	638	7.764	431	431	555	420	606	4.61622	4.38046	4.89264	4.60188	5.52722
1	Swetha_20410	Intron gain, Alternative 5' splice site	New BS at 786, 987-1027; new SD 935-953; mutn SF6	127	7.8224	663	7.9707	274	6.5789	218	280	373	671	843	5.3855	4.78717	4.85561	5.51085	6.13588
2	Swetha_23066		Mutn SF6	127	7.8224	663	7.9707	274	6.5789	218	280	373	671	249	5.3855	4.78717	4.85561	5.51085	4.49126
1	Baizhima_09780	Intron gain, exon skipping, alternative 3' splice end	Mutn of SA, new BS at 1652, new SA at 943	821	12.7251	323	11.1839	64	7.4257	1163	1163	690	259	1430	5.98497	5.19298	5.7484	5.75657	4.71335
2	Swetha_12618		BS at 1616, 881	749	12.7251	1373	10.2916	64	7.4257	1127	1127	618	259	1394	5.98497	5.19298	5.7484	5.75657	4.71335
3	Swetha_12621		BS at 881	749	12.7251	1373	10.2916	64	7.4257	1127	1127	618	259	1394	5.98497	5.19298	5.7484	5.75657	4.71335
1	Baizhima_05820	Alternative exon ends	transcript variant	530	6.8661	732	7.6168	78	6.7452	447	195	1297	1280	588	5.73874	5.0854	5.29851	5.76662	5.32201
2	Swetha_03766			530	6.8661	732	7.6168	78	6.7452	447	195	1297	1280	588	5.73874	5.0854	5.29851	5.76662	5.32201
3	Yuzhi11_02483			530	6.8661	732	7.6168	78	6.7452	447	195	1294	1277	588	5.73874	5.0854	5.29851	5.76662	5.32201
1	Baizhima_16634	Intron gain, exon skipping, alternative 5' splice end	Mutn in SD, BS, SRSF1, IgM-BRCA1	699	9.823	1366	11.7178	255	6.0505	1360	1409	471	689	1457	4.99607	4.76173	5.32314	5.51085	5.52722
2	Zhongzhi13_15124			699	9.823	1229	11.7178	255	6.0505	1223	1272	471	689	1320	4.99607	4.76173	5.32314	5.51085	5.52722
3	Mishuozhima_16334			555	10.0227	1222	11.7178	39	6.3211	537	537	327	545	1313	5.73874	4.81171	5.32314	5.51085	5.52722
4	Swetha_21316			555	9.823	1222	11.7178	1653	6.8305	1216	1682	327	545	1313	4.99607	5.0854	5.32314	5.51085	5.52722
1	Baizhima_30706	Mutually exclusive exon, exon skipping, Alternative 5' and 3' splice end	Mutn in SA, SRSF5	235	8.5043	1114	8.4117	1308	6.8305	881	1289	1153	794	735	5.73874	5.29333	5.35408	5.44452	6.13588
2	Swetha_41017		New SD at 198, new SA at 185, Mutn SRSF5	448	8.5043	1327	8.4117	1521	6.8305	1094	1502	1366	1007	948	5.73874	5.29333	5.35408	5.44452	6.13588
3	Zhongzhi13_32148		Mutn in SA, new BS at 28-105, 275, 279, Mutn SRSF5	385	8.5043	55	9.3146	1407	6.8305	980	1388	1252	249	885	5.73874	5.29333	5.35408	4.95151	6.13588
1	Zhongzhi13_10461	Intron gain by gene fudion, Alternative 5' and 3' splice ends	Mutn in SD&SA; SF1, IgM-BRCA1, SF2, SF5	903	6.8349	303	11.7877	171	5.9828	385	385	813	1139	447	5.98962	4.79195	4.88167	5.44452	5.52722
2	Yuzhi11_07044			136	8.0433	1428	11.7877	1296	5.9828	1510	1510	13	662	643	5.98962	4.79195	5.61839	5.76662	5.52722
3	Swetha_16136			1425	5.2663	326	9.8059	238	5.8932	1636	345	510	371	352	4.65854	4.51294	4.87324	5.76662	5.52722
1	Baizhima_18367	Mutually exclusive exon, exon skipping, Alternative 5' and 3' splice ends	Mutn in SD, SA & BS; SF2, SF5&SF6	401	11.1269	123	8.7669	58	7.764	1205	1205	393	496	133	5.29152	5.10994	5.33156	5.65565	4.71335
2	Yuzhi11_11470			655	5.1154	21	8.7669	936	6.5858	830	830	291	521	31	5.29152	5.10994	5.33156	5.44452	4.71335
3	Swetha_23589			232	5.1154	433;582	5.6535;5.3615	33	7.0835	407	407	933	25	232	5.29152	5.10994	4.84114	5.39988	4.49126
4	Swetha_23592			401	11.1269	123	8.7669	58	7.764	1118	1118	393	496	133	5.29152	5.10994	5.33156	5.65565	4.71335
5	Zhongzhi13_17382			401	11.1269	123	8.7669	58	7.764	1205	1205	393	496	133	5.29152	5.10994	5.33156	5.65565	4.71335
1	Swetha_07942	Intron gain by gene fusion, Alternative 5' and 3' splice ends	new BS at 1431,1560&1645; new SD 119, new SA at 1672	228	8.9728	1780	7.6207	669	7.3351	551	1790	705	218	1863	5.98497	5.4912	5.77092	5.44452	5.77064
2	Zhongzhi13_03834			153	8.9728	814	7.6207	594	7.3351	476	824	630	143	897	5.98497	5.4912	5.77092	5.44452	5.77064
1	Baizhima_23871	Alternative exon ends	Transcript variant, no sequence change	219	9.7073	749	10.8312	755	6.1759	639	639	1137	1146	807	5.01196	4.37634	5.52935	5.19879	4.95677
2	Mishuozhima_23482			219	9.7073	749	10.8312	755	6.1759	639	639	1137	1146	807	5.01196	4.37634	5.52935	5.19879	4.95677
1	Baizhima_08704	Intron gain, Alternative 5' and 3' splice ends	Mutn in SA, SF5; new BS at 146, New SD at 79	1669	8.7882	655	8.4458	29	7.1551	1071	1071	1701	782	1359	5.73874	4.81171	5.77092	5.44452	6.13588
2	Swetha_10977		Mutn in SA, SF5	1675	8.7882	661	9.7758	29	7.1551	1077	1077	1707	483	1365	5.73874	4.81171	5.77092	5.461	6.13588
3	Zhongzhi13_06339		Mutn in SA, SF5; new BS at 146, New SD at 79	1588	8.7882	655	8.4458	29	7.1551	1071	1071	1620	782	1359	5.73874	4.81171	5.77092	5.44452	6.13588
1	Baizhima_10330	Mutually exclusive exon, Intron gain by gene fusion, exon skipping, Alternative 5' and 3' splice ends	new BS at 91	251	9.3254	183	6.1551	826	6.5789	645	944	141	829	398	5.3855	4.88224	5.38755	5.75657	5.32201
2	Mishuozhima_01934		new BS at 91, 770	251	9.3254	183	6.1551	871	6.5789	645	989	141	874	398	5.3855	4.88224	5.38755	5.75657	5.32201
3	Zhongzhi13_02194		new BS at 348, 740, new SD at 349	251	9.3254	183	6.1551	841	6.5789	615	959	141	844	431	5.3855	4.88224	5.38755	5.75657	5.32201
4	Swetha_02835		mutn in SA, BS &SF1, IgM-BRCA1, SF2 & SF6	251	9.3254	2464	8.3723	2309	7.1551	1819	1819	1731	811	1612	6.34286	5.01964	6.22082	5.75657	5.52722
1	Swetha_33069	Intron gain by gene fusion, exon skipping, Alternative 5' and 3' splice ends	Mutn in SD, SA, BS and all trans factors	1331	13.2306	1191	7.3935	65	7.764	1201	1201	1206	1200	324	5.98497	5.19298	4.53179	5.96771	5.32201
2	Swetha_33068			487	6.7612	682	5.2116	579	6.5599	76	76	686	483	115	4.29797	4.70413	4.46875	4.93042	4.49126
3	Yuzhi11_17013			874	6.7612	192	6.032	65	7.764	158	158	87	212	324	5.46656	4.96965	4.51239	5.75657	5.32201
1	Zhongzhi13_30427	Alternative exon ends	transcript variant, no sequence change	575	7.5211	1160	9.4231	633	6.7379	1195	1195	796	602	812	5.89564	5.31787	4.63023	5.65565	5.30513
2	Yuzhi11_13872			569	7.5211	1154	9.4231	627	6.7379	1189	1189	790	596	806	5.89564	5.31787	4.63023	5.65565	5.30513
1	Baizhima_06882	Intron gain by gene fusion, exon skipping, Alternative 5' and 3' splice ends	Mutn in SD, SA	409	7.5921	499	10.7253	794	6.1448	784	784	726	102	44	6.34286	5.01964	5.33156	5.39988	6.13588
2	Swetha_29014			707	6.6836	41	9.1046	845	6.1448	835	835	777	243	185	6.34286	5.01964	5.33156	5.39988	6.13588
1	Zhongzhi13_10370	Alternative exon ends	New BS at 37, 157	359	7.3375	1220	11.8678	920	5.8131	768	362	466	1323	306	5.73874	4.88224	5.80722	5.12507	6.13588
2	Swetha_16019		New BS at 33	137	7.3375	998	11.8678	698	5.8131	546	140	244	1101	84	5.73874	4.88224	5.80722	5.12507	6.13588
3	Swetha_16020			68	7.3375	929	11.8678	629	5.8131	477	71	175	1032	15	5.73874	4.88224	5.80722	5.12507	6.13588
1	Swetha_41771	Mutually exclusive exon, exon skipping, Alternative 5' and 3' splice ends	SA at 272; SD at 914; BS mutn	1186	10.412	1004	11.0634	692	6.1759	1027	252	1110	933	291	5.73874	5.06563	5.04474	5.44452	5.52722
2	Zhongzhi13_33595		SD at 271&914; BS mutn	1186	10.412	1004	11.0634	692	6.1759	1027	252	1110	933	1065	5.73874	5.06563	5.04474	5.44452	5.52722
3	Zhongzhi13_33551		SD at 271& 842; bS mutn	1114	10.412	932	11.0634	1147	5.6889	955	252	1038	861	993	5.73874	5.06563	5.04474	5.44452	5.52722
4	Baizhima_31489		SA at 770&272; SD at 806; BS 774; BS mutn	1078	10.412	896	11.0634	1111	5.6889	919	252	1002	825	291	5.73874	5.06563	5.04474	5.44452	5.52722
1	Yuzhi11_08258	Mutually exclusive exon, Intron gain by gene fusion, exon skipping, Alternative 5' and 3' splice ends	Mutn in SD, SA, SF1, IgM-BRCA1, SF2 & SF6	230	9.3789	1334	10.371	1282	6.2788	483	344	855	849	317	5.5424	5.10994	4.87324	4.93503	5.32201
2	Zhongzhi13_12386			4	11.1057	2024	10.371	1972	6.2788	1173	14	455	1539	393	5.5424	5.26351	5.10408	4.93503	6.13588
3	Swetha_18219			143	9.3789	1265; 1223	10.371; 10.1647	1213	6.2788	396	257	786	780	708	5.5424	5.10994	4.87324	4.93503	6.13588
4	Baizhima_14285			230	9.3789	1334; 1292	10.37110.1647	1282	6.2788	483	344	855	849	317	5.5424	5.10994	4.87324	4.93503	5.32201
5	Mishuozhima_13998			143	9.3789	1247; 1205	10.371; 10.1647	1195	6.2788	396	257	768	762	230	5.5424	5.10994	4.87324	4.93503	5.32201
6	Swetha_18222			835	9.869	644; 602	10.371; 10.1647	592	6.2788	941	941	2073	360	1560	5.29152	5.10994	6.00176	4.93503	5.52722
1	Zhongzhi13_21493	Intron gain by gene fusion, alternative 5' splice end	Mutn in SD; SF2& SF6	151	9.6489	372	10.7908	708	7.0835	442	442	255	321	475	5.98497	5.19298	4.06229	5.44452	4.58418
2	Yuzhi11_14286		SD at pos 30; Mutn in SD; SF2& SF6	169	9.6489	390	10.7908	726	7.0835	460	460	273	339	493	5.98497	5.19298	4.06229	5.44452	4.58418
3	Swetha_28399		New4 SA; 2 SD; 4BS ; Mutn in SD; SF2& SF6	824	8.764	2343	10.7908	2679	7.0835	1781	1781	1416	2292	455	5.98497	5.19298	4.88167	5.44452	5.52722
1	Swetha_28864	Mutually exclusive exon, Intron gain by gene fusion, exon skipping, Alternative 5' and 3' splice ends	Mutn in SD, SA & BS; mutn IgM-BRCA1, SF2	495	5.9478	632	6.3362	546	5.1126	531	280	23	530	216	6.23585	5.19298	4.65083	6.01878	6.13588
2	Swetha_28866			682	9.4125	548	11.5199	399	6.5727	339	558	520	338	24	6.23585	5.26351	5.33157	6.01878	6.13588

## Sheet: WRKY_EXINT_size
SI-6 The variation in exon-intron sequences among WRKY homologs in the sesame pan-genome. The micro-exon containing genes are highlited as green.
Gene	Class	Intron	mRNA	Exon-1	Exon-2	Exon-3	Exon-4	Exon-5	Exon-6	Exon-7	Exon-8	Exon-9	Exon-10	Exon-11	Exon-12	Intron-1	Intron-2	Intron-3	Intron-4	Intron-5	Intron-6	Intron-7	Intron-8	Intron-9	Intron-10	Intron-11	Intron-12	Intron-13
Baizhima_02538	T2E	3	1901	436	110	364	25			micro exon: 31						109	84	773
Zhongzhi13_02671	T2E	3	1901	436	110	364	25									109	84	773
Yuzhi11_01468	T2E	3	1901	436	110	364	25									109	84	773
Mishuozhima_02367	T2E	3	1901	436	110	364	25									109	84	773
Swetha_03474	T2E	4	2518	445	110	515	110	450								109	586	109	84
Swetha_34662	T2E	3	2070	478	110	253	223									92	127	787
Mishuozhima_25520	T2E	2	1275	478	110	468										92	127
Zhongzhi_26659	T2E	1	1267	478	468											321
Baizhima_26060	T2E	2	1275	478	110	468										92	127
Yuzhi11_17950	T2E	2	1275	478	110	468										92	127
Swetha_14675	T2E	10	5516	162	129	124	138	144	65	138	79	487	113	543		582	458	859	130	112	306	108	552	84	203
Mishuozhima_11288	T2E	2	1400	457	113	543										84	203
Zhongzhi13_09335	T2E	2	1400	457	113	543										84	203
Baizhima_11581	T2E	2	1400	457	113	543										84	203
Yuzhi11_06213	T2E	2	1400	457	113	543										84	203
Swetha_20694	T2E	3	1671	388	113	195	191									93	127	564
Swetha_20700	T2E	2	1234	406	30	467										93	238
Mishuozhima_15901	T2E	3	1394	388	113	477	53									93	127	143
Zhongzhi13_14640	T2E	3	1394	388	113	477	53									93	127	143
Baizhima_16195	T2E	3	1394	388	113	477	53									93	127	143
Yuzhi11_09613	T2E	3	1394	388	113	477	53									93	127	143
Swetha_21913	T2E	2	3688	432	88	578										924	1666
Zhongzhi13_15593	T2E	2	1183	73	140	549										68	353
Swetha_21917	T2E	2	1183	73	140	549										68	353
Mishuozhima_16710	T2E	2	1183	73	140	549										68	353
Yuzhi11_10522	T2E	2	1183	73	140	549										68	353
Baizhima_17041	T2E	2	1183	73	140	549										68	353
Baizhima_18830	T2B	2	2397	589	136	625										777	270
Mishuozhima_18548	T2B	2	2399	589	140	627										777	266
Swetha_24326	T2B	2	2381	589	140	627										765	260
Yuzhi11_11924	T2B	2	2392	589	140	627										775	261
Zhongzhi13_17943	T2B	1	2373	565	627											1181
Mishuozhima_28699	T2B	2	2490	610	140	636										671	433
Swetha_38977	T2B	2	2490	610	140	636										671	433
Yuzhi11_13890	T2B	2	2490	610	140	636										671	433
Baizhima_29275	T2B	2	2490	610	140	636										671	433
Zhongzhi13_30409	T2B	2	2490	610	140	636										671	433
Yuzhi11_19897	T2C	2	4445	136	146	537										95	3531
Baizhima_28206	T2C	2	4446	136	146	537										96	3531
Mishuozhima_27599	T2C	2	4418	136	146	537										95	3504
Zhongzhi13_29190	T2C	3	4392	136	146	60	458									95	285	3212
Baizhima_18902	T2E	2	1212	151	155	597										191	118
Swetha_24472	T2E	3	1282	151	155	226	370									191	118	71
Mishuozhima_18646	T2E	2	1212	151	155	597										191	118
Yuzhi11_20764	T2E	3	1286	145	167	77	465									209	151	72
Zhongzhi13_30232	T2E	2	1266	145	167	594										209	151
Swetha_38725	T2E	2	1266	145	167	594										209	151
Mishuozhima_28532	T2E	2	1266	145	167	594										209	151
Baizhima_29097	T2E	2	1266	145	167	594										209	151
Swetha_38738	T2E	2	1094	22	167	594										160	151
Swetha_15080	T3	2	2334	325	101	522										659	727
Zhongzhi13_09637	T3	2	2283	274	101	522										659	727
Baizhima_11863	T3	2	2334	325	101	522										659	727
Mishuozhima_11579	T3	2	2334	325	101	522										659	727
Yuzhi11_25180	T3	2	2334	325	101	522										659	727
Mishuozhima_18313	T3	9	8931	313	101	95	447	289	108	1085	95	136	174			742	1375	371	422	310	834	1061	142	831
Swetha_23996	T3	9	8968	313	101	95	447	289	108	1085	95	136	174			744	1410	371	422	310	834	1061	142	831
Yuzhi11_23930	T3	9	8608	313	101	95	447	289	108	1085	95	136	174			742	1052	371	422	310	834	1061	142	831
Baizhima_07261	T3	9	8911	313	101	95	447	289	108	1085	95	136	174			742	1355	371	422	310	834	1061	142	831
Zhongzhi13_17682	T3	6	8906	211	101	447	1085	95	136	174						839	1821	1963	1061	142	831
Baizhima_27487	T2C	2	1595	268	104	609										504	110
Mishuozhima_04446	T2C	2	1600	268	104	609										521	98
Yuzhi11_19205	T2C	2	1699	268	104	609										620	98
Zhongzhi13_28339	T2C	2	1579	268	104	609										500	98
Swetha_05796	T2C	1	1292	424	129											739
Zhongzhi13_09638	T2C	2	3321	424	131	468										818	1480
Mishuozhima_11580	T2C	2	3216	424	131	468										713	1480
Yuzhi11_25181	T2C	2	3218	424	131	468										715	1480
Baizhima_11864	T2C	2	3218	424	131	468										715	1480
Swetha_15083	T2C	0	476
Baizhima_07052	T3	2	3075	265	128	633										109	1940
Zhongzhi13_09283	T3	2	3075	265	128	633										109	1940
Swetha_14611	T3	2	3074	265	128	633										109	1939
Mishuozhima_06652	T3	2	3075	265	128	633										109	1940
Yuzhi11_22954	T3	2	1247	310	128	606										93	110
Baizhima_01413	T3	2	1247	310	128	606										93	110
Mishuozhima_01183	T3	2	1247	310	128	606										93	110
Zhongzhi13_01348	T3	2	1224	310	128	606										93	87
Mishuozhima_14551	T3	2	1327	322	128	615										94	168
Yuzhi11_08746	T3	2	1327	322	128	615										94	168
Baizhima_14850	T3	2	1327	322	128	615										94	168
Zhongzhi13_12988	T3	2	1327	322	128	615										94	168
Yuzhi11_17922	T2D	1	1208	127	477											604
Baizhima_07083	T2D	1	1208	127	477											604
Mishuozhima_06713	T2D	1	1208	127	477											604
Zhongzhi13_26627	T2D	1	1208	127	477											604
Swetha_34609	T2D	1	1244	127	519											598
Baizhima_10164	T2B	2	1819	331	128	591										142	627
Mishuozhima_02409	T2B	2	1819	331	128	591										142	627
Swetha_06527	T2B	2	1821	331	128	591										144	627
Zhongzhi13_02714	T2B	2	1821	331	128	591										144	627
Swetha_03532	T2B	2	1556	331	128	378										143	576
Yuzhi11_01510	T2B	2	1821	331	128	591										144	627
Mishuozhima_14271	T2D	3	1640	14	775	125	144									115	109	358
Baizhima_14557	T2D	2	938	202	125	144										109	358
Zhongzhi13_12681	T2D	3	1640	14	775	125	144									115	109	358
Yuzhi11_08442	T2D	3	1640	14	775	125	144									115	109	358
Swetha_18596	T2D	10	5595	71	68	106	749	125	116	5	143	749	125	144		116	745	289	109	358	137	832	141	109	358
Zhongzhi13_15309	T2D	4	3842	88	40	828	125	144								1310	692	107	508
Baizhima_16771	T2D	4	3843	88	40	828	125	144								1311	692	107	508
Yuzhi11_10202	T2D	2	1710	826	125	144										107	508
Mishuozhima_16499	T2D	4	3843	88	40	828	125	144								1311	692	107	508
Swetha_21534	T2D	2	1646	766	125	144										107	504
Mishuozhima_00319	T2D	2	1218	703	125	174										109	107
Baizhima_00523	T2D	2	1218	703	125	174										109	107
Swetha_00675	T2D	2	1218	703	125	174										109	107
Yuzhi11_00107	T2D	2	1218	703	125	174										109	107
Zhongzhi13_00117	T2D	2	1218	703	125	174										109	107
Yuzhi11_08913	T2D	2	1723	724	125	189										586	99
Swetha_19182	T2D	6	4873	176	144	288	761	53	125	189						840	130	1535	325	208	99
Mishuozhima_04503	T2D	3	1723	724	53	125	189									325	208	99
Baizhima_14976	T2D	3	1723	724	53	125	189									325	208	99
Zhongzhi13_13137	T2D	2	1686	724	125	189										549	99
Mishuozhima_23240	T2D	2	1620	712	152	165										78	513
Zhongzhi13_23735	T2D	2	1469	561	147	165										83	513
Baizhima_23613	T2D	2	1620	712	125	165										105	513
Yuzhi11_16159	T2D	2	1620	712	152	165										78	513
Swetha_31194	T2D	2	1699	625	152	165										234	523
Zhongzhi13_03714	T2D	3	1639	317	169	125	159									200	251	418
Swetha_28528	T2D	2	1305	352	125	159										251	418
Yuzhi11_02269	T2D	2	1724	317	280	159										190	778
Mishuozhima_05387	T2D	2	1655	706	125	159										251	414
Baizhima_05559	T2D	2	1655	706	125	159										251	414
Mishuozhima_09322	T2D	2	1671	721	125	159										160	506
Swetha_12711	T2D	1	968	679	129											160
Zhongzhi13_07633	T2D	2	1672	721	125	159										160	507
Yuzhi11_05224	T2D	3	1632	385	170	125	159									126	160	507
Baizhima_09838	T2D	2	1672	721	125	159										160	507
Swetha_12712	T2D	2	1108	157	125	159										160	507
Baizhima_01861	T2A	3	1509	83	338	116	350									272	99	251
Mishuozhima_01662	T2A	3	1509	83	338	116	350									272	99	251
Yuzhi11_00789	T2A	3	1509	83	338	116	350									272	99	251
Zhongzhi13_01901	T2A	3	1509	83	338	116	350									272	99	251
Swetha_02485	T2A	5	20483	83	59	338	116	205	201							89	124	99	251	18918
Mishuozhima_08695	T2C	3	1308	119	338	116	350									155	130	100
Swetha_11646	T2C	3	1308	119	338	116	350									155	130	100
Zhongzhi13_06862	T2C	3	1308	119	338	116	350									155	130	100
Baizhima_09190	T2C	3	1308	119	338	116	350									155	130	100
Yuzhi11_04588	T2C	3	1311	119	338	116	350									158	130	100
Yuzhi11_16041	T2A	4	1501	89	53	284	116	386								123	208	143	99
Baizhima_15045	T2A	4	1501	89	53	284	116	386								123	208	143	99
Mishuozhima_14718	T2A	4	1501	89	53	284	116	386								123	208	143	99
Zhongzhi13_13210	T2A	4	1501	89	53	284	116	386								123	208	143	99
Swetha_19273	T2A	4	1501	89	53	284	116	386								123	208	143	99
Swetha_00744	T2A	3	4635	1037	257	116	404									2396	333	92
Mishuozhima_00361	T2A	2	1165	248	116	401										308	92
SIN_1021622	T2A	2	1165	248	116	401										308	92
Mishuozhima_00366	T2A	2	1164	248	116	401										307	92
SIN_1021618	T2C	3	1943	29	257	116	401									741	307	92
Swetha_27391	T2B	4	2640	167	152	362	113	683								99	94	111	859
Zhongzhi13_20690	T2B	4	2640	167	152	362	113	683								99	94	111	859
Yuzhi11_03305	T2B	4	2640	167	152	362	113	683								99	94	111	859
Baizhima_21014	T2B	4	2656	167	152	362	113	683								116	94	111	858
Mishuozhima_20687	T2B	4	2656	167	152	362	113	683								116	94	111	858
Zhongzhi13_24455	T2B	4	2291	185	122	359	113	722								122	138	172	358
Mishuozhima_23827	T2B	4	2291	185	122	359	113	722								122	138	172	358
Yuzhi11_16521	T2B	4	2291	185	122	359	113	722								122	138	172	358
Baizhima_24252	T2B	4	2291	185	122	359	113	722								122	138	172	358
Baizhima_20694	T2B	3	3019	119	524	113	926									980	92	265
Zhongzhi13_20329	T2B	3	3019	119	524	113	926									980	92	265
Yuzhi11_13325	T2B	3	3019	119	524	113	926									980	92	265
Swetha_26862	T2B	3	3019	119	524	113	926									980	92	265
Mishuozhima_20370	T2B	3	3019	119	524	113	926									980	92	265
Swetha_26866	T2B	6	7414	551	113	401	75	89	88	128						92	265	3883	966	86	677
Swetha_09830	T2B	4	2908	119	92	548	113	932								112	801	103	88
Zhongzhi13_05263	T2B	4	2934	119	92	548	113	932								134	805	103	88
Baizhima_07781	T2B	4	2936	119	92	548	113	932								134	807	103	88
Yuzhi11_03598	T2B	4	2962	149	92	548	113	932								134	803	103	88
Mishuozhima_07342	T2B	4	2934	119	92	548	113	932								134	805	103	88
Baizhima_23876	T2B	3	1884	86	551	113	728									110	102	194
Mishuozhima_23487	T2B	3	1884	86	551	113	728									110	102	194
Zhongzhi13_24031	T2B	3	1842	86	551	113	686									109	102	195
Yuzhi11_23067	T2B	3	1842	86	551	113	686									109	102	195
Swetha_31558	T2B	3	1842	86	551	113	686									109	102	195
Mishuozhima_19837	T2B	3	2623	356	113	564	697									91	204	598
Baizhima_20170	T2B	3	2623	356	113	564	697									91	204	598
Zhongzhi13_19696	T2B	3	2623	356	113	564	697									91	204	598
Swetha_26113	T2B	3	2703	356	113	581	1019									91	205	338
Swetha_26111	T2B	3	6413	338	314	113	626									4726	91	205
Yuzhi11_12853	T2B	2	1391	356	113	626										91	205
Zhongzhi13_29584	T2B	4	2165	65	173	302	113	536								91	139	409	337
Yuzhi11_20249	T2B	4	2174	65	173	302	113	536								91	139	409	346
Swetha_37873	T2B	5	2645	206	101	173	302	113	536							231	101	132	404	346
Mishuozhima_02432	T2B	5	2172	65	173	302	113	101	536							101	132	404	159	86
Baizhima_28528	T2B	5	2693	206	173	302	113	101	536							481	132	404	159	86
Mishuozhima_28814	T2B	4	2244	296	101	425	113	647								118	135	160	249
Zhongzhi13_30549	T2B	4	2244	296	101	425	113	647								118	135	160	249
Yuzhi11_24840	T2B	4	2244	296	101	425	113	647								118	135	160	249
Baizhima_29373	T2B	4	2243	296	101	425	113	662								118	135	160	233
Swetha_39149	T2B	4	2045	98	101	425	113	647								118	135	160	248
Swetha_39148	T2B	7	6597	317	121	172	124	101	425	113	647					1908	122	1886	118	135	160	248
Swetha_36571	T2B	5	5124	419	101	434	113	740	215							519	146	94	184	2159
Mishuozhima_26928	T2B	4	2755	419	101	434	113	701								519	142	94	232
Yuzhi11_19438	T2B	4	2755	419	101	434	113	701								519	142	94	232
Baizhima_27586	T2B	4	2755	419	101	434	113	701								519	142	94	232
Zhongzhi13_28437	T2B	4	2755	419	101	434	113	701								519	142	94	232
Baizhima_20032	T2B	5	2235	296	98	164	332	113	686							102	88	126	106	124
Yuzhi11_12704	T2B	5	2235	296	98	164	332	113	686							102	88	126	106	124
Swetha_25903	T2B	5	2229	296	98	164	332	113	686							102	88	121	106	123
Mishuozhima_02666	T2B	5	2230	296	98	164	332	113	686							102	88	121	106	124
Zhongzhi13_19532	T2B	5	2230	296	98	164	332	113	686							102	88	121	106	124
Swetha_25904	T2B	4	5030	91	321	113	629	170								2748	106	123	729
Swetha_38328	T2B	10	5994	308	98	164	338	113	7	153	39	64	851	248		94	135	121	117	97	168	91	162	2393	233
Zhongzhi13_29935	T2B	5	2278	308	98	164	338	113	695							94	133	121	117	97
Mishuozhima_28270	T2B	5	2278	308	98	164	338	113	695							94	133	121	117	97
Baizhima_28813	T2B	5	2278	308	98	164	338	113	695							94	133	121	117	97
Yuzhi11_23561	T2B	5	2259	308	98	164	338	105	676							94	133	121	117	105
Swetha_38333	T2B	5	2160	188	98	164	338	113	695							94	135	121	117	97
Yuzhi11_19004	T2C	11	7201	256	155	449	66	231	71	130	104	479	767	227	476	109	435	940	109	128	280	356	130	110	373	820
Baizhima_27282	T2C	11	7197	256	155	449	66	231	71	130	104	479	767	227	476	109	431	940	109	128	280	356	130	110	373	820
Mishuozhima_26690	T2C	11	7198	256	155	449	66	231	71	130	104	479	767	227	476	109	432	940	109	128	280	356	130	110	373	820
Swetha_36198	T2C	11	7269	256	155	449	66	231	71	130	104	479	767	227	476	109	503	940	109	128	280	356	130	110	373	820
Zhongzhi13_28134	T2C	11	7199	256	155	449	66	231	71	130	104	479	767	227	476	109	433	940	109	128	280	356	130	110	373	820
Swetha_37469	T2C	9	10799	177	67	130	768	52	129	209	57	81	150			736	698	394	995	3634	138	501	588	1295
Mishuozhima_06323	T1	5	3775	413	97	78	694	158	279							1392	31	289	86	258
Baizhima_06492	T1	5	3775	413	97	78	694	158	279							1392	31	289	86	258
Yuzhi11_03004	T1	5	3775	413	97	78	694	158	279							1392	31	289	86	258
Zhongzhi13_04758	T1	5	3775	413	97	78	694	158	279							1392	31	289	86	258
Swetha_09150	T1	6	7145	122	278	74	97	78	694	279						853	90	124	3542	289	625
Swetha_09155	T1	9	8127	122	122	56	74	97	87	458	694	158	279			853	100	90	124	947	1635	1887	86	258
Swetha_13727	T1	3	3523	419	670	152	237									1741	86	218
Yuzhi11_05885	T1	3	3523	419	670	152	237									1741	86	218
Baizhima_10878	T1	3	3523	419	670	152	237									1741	86	218
Zhongzhi13_08421	T1	3	3196	92	670	152	237									1741	86	218
Mishuozhima_10568	T1	3	3523	419	670	152	237									1741	86	218
Swetha_13729	T2C	2	880	187	152	237										86	218
Baizhima_23935	T1	3	2367	446	646	158	282									643	82	110
Mishuozhima_23545	T1	3	2367	446	646	158	282									643	82	110
Yuzhi11_23124	T1	3	2366	446	646	158	282									643	82	109
Zhongzhi13_24090	T1	3	2366	446	646	158	282									643	82	109
Swetha_24868	T1	17	9522	175	222	86	296	94	238	95	43	694	158	75	143	215	316	111	236	86	485	644	76	299	438	1893	216	191	835	82	127	135	375	84	97	86	87	89
Swetha_24865	T1	3	2816	413	694	158	273									1069	82	127
Mishuozhima_18943	T1	3	2816	413	694	158	273									1069	82	127
Zhongzhi13_18384	T1	3	2816	413	694	158	273									1069	82	127
Baizhima_06844	T1	3	2816	413	694	158	273									1069	82	127
Yuzhi11_12196	T1	3	2669	413	694	158	126									1069	82	127
Yuzhi11_18904	T1	4	2364	233	131	520	158	171								94	179	355	523
Zhongzhi13_28050	T1	4	2362	233	131	520	158	171								94	179	355	521
Baizhima_27200	T1	4	2330	206	131	520	158	171								94	179	351	520
Mishuozhima_26608	T1	4	2330	206	131	520	158	171								94	179	351	520
Swetha_36105	T1	4	2330	206	131	520	158	171								94	179	351	520
Swetha_37939	T1	9	7929	260	194	501	147	155	412	124	501	147	171			1685	651	374	85	486	926	651	374	85
Zhongzhi13_29637	T1	5	4588	260	194	501	147	155	492							1243	651	374	85	486
Mishuozhima_28009	T1	5	4588	260	194	501	147	155	492							1243	651	374	85	486
Yuzhi11_20285	T1	5	4588	260	194	501	147	155	492							1243	651	374	85	486
Baizhima_28580	T1	5	4588	260	194	501	147	155	492							1243	651	374	85	486
Yuzhi11_19706	T1	3	2588	1287	180	158	252									74	77	560
Baizhima_27900	T1	3	2588	1287	180	158	252									74	77	560
Mishuozhima_27258	T1	3	2588	1287	180	158	252									74	77	560
Swetha_37006	T1	3	2588	1287	180	158	252									74	77	560
Zhongzhi13_28798	T1	3	2588	1287	180	158	252									74	77	560
Swetha_16173	T1	4	2818	320	239	820	155	744								223	77	128	112
Baizhima_12604	T1	4	2818	320	239	820	155	744								223	77	128	112
Mishuozhima_03451	T1	4	2818	320	239	820	155	744								223	77	128	112
Zhongzhi13_10493	T1	4	2818	320	239	820	155	744								223	77	128	112
Yuzhi11_07075	T1	4	2818	320	239	820	155	744								223	77	128	112
Swetha_16175	T1	4	2941	320	99	873	155	744								223	287	128	112
Baizhima_28619	T1	4	2857	440	188	820	158	561								342	150	89	109
Zhongzhi13_29729	T1	4	2857	440	188	820	158	561								342	150	89	109
Yuzhi11_20376	T1	4	2857	440	188	820	158	561								342	150	89	109
Mishuozhima_28079	T1	4	2857	440	188	820	158	561								342	150	89	109
Swetha_38042	T1	4	2856	440	188	820	158	561								342	150	88	109
Swetha_39685	T1	4	2262	474	672	158	94	103								423	70	110	158
Swetha_06502	T1	4	3208	458	182	811	158	573								585	261	70	110
Mishuozhima_29258	T1	4	3206	458	182	811	158	573								585	259	70	110
Zhongzhi13_31089	T1	4	3206	458	182	811	158	573								585	259	70	110
Yuzhi11_21059	T1	4	3206	458	182	811	158	573								585	259	70	110
Baizhima_29801	T1	4	3206	458	182	811	158	573								585	259	70	110
Baizhima_18023	T1	4	6140	282	52	649	158	348								181	985	133	3352
Swetha_23040	T1	4	4226	125	291	52	526	162								1525	181	1231	133
Yuzhi11_11054	T1	4	6141	282	52	649	158	348								181	985	133	3353
Swetha_06379	T1	4	6140	282	52	649	158	348								181	985	133	3352
Zhongzhi13_16955	T1	4	6140	282	52	649	158	348								181	985	133	3352
Mishuozhima_03045	T1	4	6140	282	52	649	158	348								181	985	133	3352
Baizhima_16315	T1	4	2422	260	161	625	161	417								160	164	328	146
Swetha_20852	T1	4	2422	260	161	625	161	417								160	164	328	146
Yuzhi11_09724	T1	4	2422	260	161	625	161	417								160	164	328	146
Mishuozhima_16023	T1	9	10757	108	193	160	3	53	302	161	625	161	417			86	2996	958	205	3531	160	163	329	146
Zhongzhi13_14768	T1	4	2422	260	161	625	161	417								160	164	328	146
Mishuozhima_26841	T1	4	2314	254	128	610	161	423								126	425	99	88
Yuzhi11_19160	T1	4	2313	254	128	610	161	423								124	426	99	88
Zhongzhi13_28295	T1	4	2314	254	128	610	161	423								126	425	99	88
Baizhima_27443	T1	4	2313	254	128	610	161	423								107	443	99	88
Swetha_16214	T1	5	3106	104	122	628	164	189	116							769	578	89	115	232
Swetha_04277	T1	4	2602	329	122	628	164	414								163	578	89	115
Zhongzhi13_10532	T1	4	2588	329	122	628	164	375								163	583	89	135
Yuzhi11_07110	T1	4	2607	329	122	628	164	414								163	581	89	117
Mishuozhima_12424	T1	4	2609	329	122	628	164	414								163	583	89	117
Baizhima_17686	T1	5	2605	329	122	61	626	164	414							163	301	219	89	117
Baizhima_15231	T2C	2	628	237	111	132										80	68
Zhongzhi13_13433	T2C	2	628	237	111	132										80	68
Yuzhi11_09006	T2C	2	628	237	111	132										80	68
Swetha_19583	T2C	2	628	237	111	132										80	68
Mishuozhima_14908	T2C	2	628	237	111	132										80	68
Swetha_19579	T2C	7	4966	237	111	71	224	15	83	58	192					80	68	2551	125	847	115	189
Zhongzhi13_00291	T2C	2	1281	285	141	126										156	573
Mishuozhima_00455	T2C	2	1281	285	141	126										156	573
Baizhima_00677	T2C	2	1281	285	141	126										156	573
Yuzhi11_19278	T2C	2	1281	285	141	126										156	573
Swetha_00918	T2C	2	1281	285	141	126										156	573
Baizhima_10914	T2C	2	4058	427	146	381										2143	961
Zhongzhi13_08457	T2C	2	4046	421	146	381										2143	955
Yuzhi11_05912	T2C	2	4048	427	146	381										2143	951
Swetha_13781	T2C	2	4054	427	146	381										2143	957
Mishuozhima_10600	T2C	2	4050	427	146	381										2143	953
Zhongzhi13_04749	T2C	3	3010	487	125	143	372									120	1197	566
Yuzhi11_02995	T2C	3	2977	454	125	143	372									120	1197	566
Mishuozhima_03444	T2C	3	2977	454	125	143	372									120	1197	566
Baizhima_06483	T2C	3	2977	454	125	143	372									120	1197	566
Swetha_09138	T2C	4	38446	113	340	32	143	369								123	35316	1444	566
Swetha_41219	T2C	1	2477	313	171											1993
Baizhima_30863	T2C	2	2713	313	221	171										179	1829
Mishuozhima_30302	T2C	2	2581	313	221	171										179	1697
Yuzhi11_18862	T2C	2	2596	313	221	171										179	1712
Swetha_25707	T2C	2	2652	313	221	171										179	1768
Zhongzhi13_32303	T2C	2	2585	313	221	171										181	1699
Yuzhi11_15309	T2C	1	488	238	150											100
Baizhima_22822	T2C	1	488	238	150											100
Mishuozhima_22473	T2C	1	488	238	150											100
Zhongzhi13_22905	T2C	1	488	238	150											100
Baizhima_26207	T2E	2	1543	287	85	81										576	514
Zhongzhi13_26827	T2E	2	1543	287	85	81										576	514
Yuzhi11_18013	T2E	2	1543	287	85	81										576	514
Mishuozhima_25659	T2E	2	1543	287	85	81										576	514
Zhongzhi13_02413	T2C	2	3558	166	167	162										954	2109
Swetha_03115	T2C	2	3562	166	167	162										954	2113
Mishuozhima_02108	T2C	2	3560	166	167	162										954	2111
Yuzhi11_01215	T2C	2	3560	166	167	162										954	2111
Baizhima_02278	T2C	2	3560	166	167	162										954	2111
Mishuozhima_30045	T2C	6	3954	5	69	748	228	40	388	177						88	206	288	164	1272	281
Zhongzhi13_32025	T2C	6	4066	5	69	748	228	40	388	177						88	206	288	164	1272	393
Baizhima_30593	T2C	6	3954	5	69	748	228	40	388	177						88	206	288	164	1272	281
Yuzhi11_21782	T2C	6	3954	5	69	748	228	40	388	177						88	206	288	164	1272	281
Swetha_06026	T2C	7	5719	83	74	69	748	232	54	388	177					827	883	206	284	145	1268	281
Swetha_40878	T2C	4	2678	509	228	40	388	177								284	163	608	281
Zhongzhi13_23851	T2C	1	1643	379	183											1081
Yuzhi11_22635	T2C	1	1643	379	183											1081
Swetha_06086	T2C	2	1782	3	388	183										128	1081
Baizhima_06773	T2C	1	1643	379	183											1081
Zhongzhi13_04978	T2C	1	757	367	177											213
Mishuozhima_06538	T2C	1	757	367	177											213
Yuzhi11_22771	T2C	1	763	367	183											213
Swetha_09460	T2C	1	757	367	177											213
Swetha_04251	T2C	1	1158	358	174											626
Baizhima_20488	T2C	1	1115	313	174											628
Mishuozhima_20182	T2C	1	1115	313	174											628
Yuzhi11_13189	T2C	1	1116	313	174											629
Zhongzhi13_20062	T2C	1	1116	313	174											629
Swetha_20696	T1	4	3555	32	241	51	75	340								1024	1260	356	176
Zhongzhi13_14642	T1	1	1815	385	177											1253
Swetha_20702	T1	1	1815	385	177											1253
Yuzhi11_09615	T1	1	1815	385	177											1253
Mishuozhima_15903	T1	1	1815	385	177											1253
Baizhima_07573	T2C	2	1705	469	143	504										323	266
Swetha_09527	T2C	2	1624	388	143	504										323	266
Zhongzhi13_05039	T2C	2	1705	469	143	504										323	266
Yuzhi11_03421	T2C	2	1705	469	143	504										323	266
Mishuozhima_07137	T2C	2	1705	469	143	504										323	266
Swetha_09533	T2C	14	7987	388	143	126	165	376	22	94	82	68	185	134	70	77	141	110				323	1646	151	144	137	1082	116	197	124	174	657	274	700	81
Yuzhi11_17788	T2C	2	1622	511	143	453										314	201
Mishuozhima_25401	T2C	2	1618	511	143	453										314	197
Zhongzhi13_26477	T2C	2	1616	505	143	453										314	201
Baizhima_25943	T2C	2	1622	511	143	453										314	201
Swetha_34424	T2C	4	10622	278	187	143	327	170								34	314	279	8890
Mishuozhima_16722	T2C	2	1294	322	146	411										210	205
Yuzhi11_10534	T2C	2	1294	322	146	411										210	205
Baizhima_17053	T2C	2	1294	322	146	411										210	205
Zhongzhi13_15605	T2C	2	1294	322	146	411										210	205
Baizhima_04778	T2C	2	1592	475	140	330										420	227
Yuzhi11_21397	T2C	2	1594	475	140	330										422	227
Zhongzhi13_31495	T2C	2	1590	475	140	330										418	227
Mishuozhima_29606	T2C	2	1592	475	140	330										420	227
Swetha_40212	T2C	2	1594	475	140	330										420	229
Baizhima_28247	T2C	2	3315	520	152	351										660	1632
Zhongzhi13_29244	T2C	2	3320	520	152	351										664	1633
Yuzhi11_19933	T2C	2	3321	520	152	351										663	1635
Mishuozhima_27650	T2C	2	3322	520	152	351										664	1635
Baizhima_18879	T2C	2	1164	427	143	366										112	116
Swetha_24419	T2C	3	8274	282	144	149	363									7114	106	116
Zhongzhi13_18013	T2C	2	1164	427	143	366										112	116
Yuzhi11_11993	T2C	2	1164	427	143	366										112	116
Mishuozhima_18620	T2C	2	1164	427	143	366										112	116
Zhongzhi13_30289	T2C	2	1334	409	146	345										105	329
Mishuozhima_28573	T2C	2	1334	409	146	345										105	329
Swetha_06684	T2C	2	1353	424	146	345										105	333
Yuzhi11_14016	T2C	2	1334	409	146	345										105	329
Baizhima_29151	T2C	2	1334	409	146	345										105	329

## Sheet: WRKY_AS
SI-7 The splice variants of WRKY genes in sesame pan-genome represented as homologous sets based on phylogeny. The AS events are identified based of SD, SA, BS location in the genome and sequence variation to the common sequence.The splice factors are also represented.
Homolog_sets	WRKY Gene	Main AS events	Factor responsible	spl.donor	score	spl.acceptor	score	branch_site	score	SRSF1	SRSF1 (IgM-BRCA1)	SRSF2	SRSF5	SRSF6	Score_SF1	Score_IgM-BRCA1	Score_SF2	Score_SF5	Score_SF6
1	Mishuozhima_25520	Exon skipping, Intron gain by gene fusion, Alternative 3' and 5' splice ends	Mutn in SA, SD, BS, SF1, Ig-BRCA1,SF2&SF6	823	7.5152	1002	7.2026	711	7.764	773	773	223	724	604	6.34286	5.01964	4.76263	5.77306	4.71335
2	Swetha_03474			1535	11.7279	202	7.7863	1272	6.0272	1538	1538	1353	1318	1572	5.73874	4.81171	5.12648	5.77306	5.32201
3	Swetha_34662			823	7.325	1027	8.393	711	7.764	773	773	223	724	604	6.34286	5.01964	4.76263	5.77306	4.71335
4	Zhongzhi13_26659			712	7.8484	891	7.2026	600	7.764	662	662	223	613	493	6.34286	5.01964	4.76263	5.77306	4.71335
1	Swetha_14675	Intron gain by gene fusion, Alternative 3' splice end	SA new at 347 and 6 new BS; Mutn in SF1&SF2	1033	9.513	1419	10.8618	1695	6.3211	416	2118	176	1723	1830	5.73874	5.10994	4.56246	5.77306	5.52722
2	Mishuozhima_11288		Mutn in SF1&SF2	16	9.513	402	10.8618	678	6.3211	1101	1101	51	706	813	5.29152	5.10994	4.52406	5.77306	5.52722
1	Swetha_20694	Alternative 3' and 5' splice ends	Mutn in SD, SA & BS; and SF5	254	9.8605	809	9.4397	441	5.9959	30	278	231	510	357	5.73874	5.4912	5.21014	6.01235	4.71335
2	Swetha_20700			731	12.4817	853	7.9212	759	5.8742	48	296	249	219	375	5.73874	5.4912	5.21014	5.44452	4.71335
3	Mishuozhima_15901			824	12.4817	976	9.8476	441	5.9959	30	278	231	510	357	5.73874	5.4912	5.21014	6.01235	4.71335
1	Swetha_21913	Intron retention, Alternative 3' splice end	Mutn in SA, BS & SF2, SF6	787	7.8124	406	11.6714	102	7.764	431	431	210	1043	621	5.73874	4.81171	5.52187	5.48177	5.52722
2	Swetha_21917			451	7.8124	698	9.6135	333	6.3021	653	653	387	707	60	5.73874	4.81171	4.69959	5.48177	6.13588
3	Mishuozhima_16710			451	7.8124	698	9.6135	333	6.3021	653	653	387	707	60	5.73874	4.81171	4.69959	5.48177	6.13588
1	Baizhima_18830	Exon skipping, Alternative 3' splice end	Mutn in SA, BS; IgM-BRCA1 &SF6	26, 1199	6.96120,7.15530	428, 713	7.48470,7.21860	6	6.3211	1006	197	1017	293	616	5.01178	4.72087	5.55398	5.72198	5.16198
2	Yuzhi11_11924			26, 1205	6.96120,7.15530	428, 713	6.96120, 6.96122	6	6.96124	1012	197	1023	293	616	5.01178	4.72087	5.55398	5.72198	5.16198
3	Zhongzhi13_17943			26; 1040	6.96120; 7.15530	404: 71	7.48470;	6	7.1307	847	436	858	269	166	5.01178	3.69631	5.55398	5.72198	4.91856
1	Mishuozhima_27599	Alternative 3' splice ends	Mutn in SA, SF5	196	6.1075	270	11.291	554	5.6801	481	481	681	291	805	5.78863	5.47144	4.53042	6.01235	5.32201
2	Zhongzhi13_29190			196	6.1075	270	11.7165	536	5.6801	463	463	663	41	787	5.78863	5.47144	4.53042	4.87935	5.32201
1	Baizhima_18902	Intron gain/loss	Transcript variant, no change in sequence	800	7.8065	294	9.5612	378	7.3351	743	743	477	315	126	6.34286	5.01964	5.3348	6.01235	6.13588
2	Swetha_24472			800	7.8065	294	9.5612	378	7.3351	743	743	477	315	126	6.34286	5.01964	5.3348	6.01235	6.13588
1	Yuzhi11_20764	Intron gain/loss, alternative exon ends	Branch site for 1st exon, SF5	212	8.1971	410	8.2255	384	7.3351	683	683	256	24	645	5.73874	4.81171	5.29103	5.39988	4.49126
2	Swetha_38738			89	8.1971	338	8.2255	261	7.3351	611	611	133	116	573	5.73874	4.81171	5.29103	5.23604	4.49126
3	Swetha_38725			212	8.1971	461	8.2255	384	7.3351	734	734	256	24	696	5.73874	4.81171	5.29103	5.39988	4.49126
1	Swetha_15080	Alternative 5'splice ends	New SD, BS	257	8.8466	733	8.822	859	6.3211	626	626	330	435	205	5.98497	5.19298	5.10072	6.01235	5.30513
2	Zhongzhi13_09637			206	8.8466	682	8.822	808	6.3211	575	575	279	384	154	5.98497	5.19298	5.10072	6.01235	5.30513
1	Baizhima_07261	transposon induced deletion -Exon skipping Alternative 3' splice ends,	Mutn in SA, New SA in Zhongzhi	767	9.8051	510	7.6746	2720	7.1551	2730	2730	1408	2339	2644	5.53775	5.4912	5.33157	6.01235	6.13588
2	Zhongzhi13_17682			569	9.8051	900; 2123	7.2536;6.98050	2123	7.1551	2133	2133	811	1742	2047	5.53775	5.4912	5.33157	6.01235	6.13588
1	Swetha_05796	Intron gain/loss, Exon skipping, Alternative 3' and 5' splice ends	Mutn in SA, SD, BS and all SF	132	8.8471	457	8.9898	365	5.8922	163	163	456	504	28	6.34286	5.01964	5.65189	5.70673	4.71335
2	Mishuozhima_11580			422	10.6996	482	9.9041	573	6.336	163	163	456	564	28	6.34286	5.01964	5.65189	6.01235	4.71335
3	Swetha_15083			199	5.6672	140	9.8532	24	6.336	152	152	341	15	150	4.99607	4.38614	5.00745	6.01235	3.8826
1	Zhongzhi13_26627	Alternative 5'splice ends	Mutn in SD & SF6	478	8.868	440	12.7522	472	6.2665	305	305	463	22	321	5.98962	4.79195	5.85996	5.44452	4.08781
2	Swetha_34609			520	8.7627	482	12.7522	514	6.2665	347	347	505	22	573	5.98962	4.79195	5.85996	5.44452	3.99621
1	Swetha_06527	Alternative exon ends	Mutn in BS; all SF	346	8.8476	833	9.2219	477	6.3211	527	527	504	558	559	6.34286	5.01964	5.52935	5.16971	4.10469
2	Swetha_03532			346	8.8476	620	9.2219	208	5.6801	503	265	167	377	642	4.61622	4.51294	5.32314	4.45324	3.99621
1	Mishuozhima_14271	Intron gain by gene fusion, Transposon induced deletion/ exon skipping, Alternative 3' and 5'splice end	Mutn in SA, SD, BS and all SF	787	6.4706	903	11.0686	371	7.4257	1027	1027	684	708	964	5.59554	4.9951	4.03102	5.75657	4.69647
2	Baizhima_14557			199	6.4706	315	11.0686	318	6.8564	439	439	96	120	376	5.59554	4.9951	4.03102	5.75657	4.69647
3	Swetha_18596			994	6.4706	1110	11.0686	578	7.4257	1234	1234	219	915	12	5.59554	4.9951	5.53635	5.75657	4.69647
4	Zhongzhi13_15309			108	7.1849	1071	9.9291	1023	6.3021	1195	60	11	6	516	5.59554	5.10994	4.78839	5.72198	6.13588
5	Yuzhi11_10202			1037	6.5754	939	9.9291	891	6.3021	1063	1063	955	632	384	5.59554	4.9951	4.28782	5.39988	6.13588
6	Swetha_21534			977	6.5754	879	9.6894	831	6.3021	1003	1003	895	572	324	5.59554	4.9951	4.28782	5.39988	6.13588
7	Swetha_00675			590	10.1612	100	6.926	267	6.1759	770	956	832	690	60	6.34286	5.4912	4.72957	4.87935	5.52722
1	Yuzhi11_08913	Transposon induced insertion, exon skipping	BS mutn (2); mutn in SF2	163	7.7763	599	8.0761	835	5.8234	791	791	312	542	249	5.89564	5.31787	5.46158	6.07868	5.32201
2	Swetha_19182		BS mutn (3); mutn in SF2	811	7.7763	1247	8.0761	1537	5.8234	1493	1493	525	1190	897	5.89564	5.31787	5.65189	6.07868	5.32201
3	Mishuozhima_04503		BS mutn (2); mutn in SF2	163	7.7763	599	8.0761	889	5.8234	845	845	312	542	249	5.89564	5.31787	5.46158	6.07868	5.32201
4	Zhongzhi13_13137		BS mutn (1); mutn in SF2	163	7.7763	599	8.0761	835	5.8234	791	791	312	542	249	5.89564	5.31787	5.46158	6.07868	5.32201
1	Mishuozhima_23240	Transposon insertion, alternative 5' and 3' splice ends	Mutn in SD, SA, SF1& Ig-M BRCA1	745	6.9138	119	11.006	47	6.7379	131	131	868	453	192	6.34286	5.01964	4.72957	5.461	5.32201
2	Zhongzhi13_23735			589	6.9138	524	10.0016	351	6.7379	382	99	712	300	39	4.99607	4.85796	4.72957	5.461	5.32201
3	Swetha_31194			47	6.8326	119	11.006	504	6.7379	131	131	781	453	192	6.34286	5.01964	4.72957	5.461	5.32201
1	Zhongzhi13_03714	Transposon induced gene fusion, Alternative 3' splice ends	Mutn in SA, BS & SF5	434	8.2207	360	8.7917	145	6.5727	422	422	377	355	442	5.89564	5.31787	5.3348	5.75657	5.32201
2	Swetha_28528			299	8.2207	225	8.7917	155	6.7379	287	287	242	220	307	5.89564	5.31787	5.3348	5.75657	5.32201
3	Yuzhi11_02269			545	8.2207	471	8.7917	401	6.7379	533	533	488	466	553	5.89564	5.31787	5.3348	5.75657	5.32201
4	Mishuozhima_05387			653	8.2207	579	9.1391	509	6.7379	641	641	596	574	661	5.89564	5.31787	5.3348	6.3244	5.32201
1	Mishuozhima_09322	Transposon induced deletion, exon skipping, Alternative 3' and 5' splice ends	Mutn in SD, SA, BS, SF1, SF2, SF5 & SF6	436	8.1097	962	9.1203	114	7.4257	176	612	69	173	33	5.34931	4.91206	4.6787	5.48177	5.52722
2	Swetha_12711			394	8.1097	544	7.6534	72	7.4257	134	570	27	553	209	5.34931	4.91206	4.6787	5.27713	4.93989
3	Yuzhi11_05224			501	6.8679	797	9.1203	114	7.4257	176	447	69	430	33	5.34931	4.91206	4.6787	5.27713	5.52722
4	Swetha_12712			102	6.8679	398	9.1203	273	6.5727	48	48	321	31	88	4.90209	4.91206	4.06334	5.27713	4.71335
1	Baizhima_01861	Exon skipping, mutually exclusive exons	Mutn in 2 BS at posn 80, 800	100	10.5352	672; 302	6.42; 6.4637	603	6.8564	622	849	807	8	675	4.76555	3.61621	5.01168	5.51085	4.69647
2	Swetha_02485			160	10.5352	732; 362	6.42; 6.4637	663	6.8564	682	969	927	8	735	4.76555	3.61621	5.01168	5.51085	4.69647
1	Swetha_00744	Intron/ exon gain by gene fusion, Alternative 3' splice ends	Mutn in SA, Ig-M BRCA1, SF2, SF6	1550	8.957	391	11.8119	1435	5.8131	1769	302	263	1559	37	5.73874	5.0854	6.22082	6.01235	5.52722
2	SIN_1021622			500	8.957	333	10.8211	388	5.8131	719	719	176	509	565	5.73874	4.81171	4.32088	6.01235	4.71335
3	SIN_1021618			539	8.957	371	9.4486	427	5.8131	758	758	215	548	720	5.73874	4.81171	4.32088	6.01235	5.32201
1	Swetha_26862	Transposon induced gene fusion, Alternative 3' splice ends	Mutn in SA, BS, SF1, IgM-BRCA1	733	9.5128	269	6.9944	1299	7.3351	99	99	270	451	23	5.29152	5.10994	5.12324	6.3244	5.16198
2	Swetha_26866			640	9.5128	1160	7.7098	950	6.0447	952	1442	177	358	927	5.11332	4.91206	5.12324	6.3244	5.16198
1	Yuzhi11_03598	Alternative exon ends	Transcript variant, no change in sequence	656	11.8862	447	8.6049	231	6.7452	920	1245	1086	1079	44	5.73874	4.9951	4.97395	5.23604	5.16198
2	Mishuozhima_07342			626	11.8862	417	8.6049	201	6.7452	890	1215	1056	1049	14	5.73874	4.9951	4.97395	5.23604	5.16198
1	Mishuozhima_23487	Alternative exon ends	Mutn of BS (2) & new BS in Mish at pos 1435.	1309	8.6859	886	10.909	1140	5.586	492	492	530	491	765	5.63173	4.96529	5.3348	6.3244	4.95677
2	Swetha_31558			1309	8.6859	886	10.909	1140	4.158	492	492	530	491	765	5.63173	4.96529	5.3348	6.3244	4.95677
1	Zhongzhi13_19696	Gene fusion, exon skipping, Alternative 3' and 5' ends	Mutn in SD, SA, BS & SF5	1267	8.3897	1190	8.8327	1578	6.2788	74	74	879	1451	69	6.34286	5.01964	5.46158	5.76662	5.52722
2	Swetha_26111			313	8.4843	833	8.2741	645	5.8932	371	371	1176	58	366	6.34286	5.01964	5.46158	5.40993	5.52722
3	Swetha_26113			110	8.2433	1300	9.5133	1917	6.2788	74	74	879	1790	69	6.34286	5.01964	5.46158	5.76662	5.52722
4	Yuzhi11_12853			110	8.2433	536	8.2741	348	5.8932	74	74	879	697	69	6.34286	5.01964	5.46158	5.17615	5.52722
1	Zhongzhi13_29584	Exon skipping, Alternative 3' and 5' splice ends	Mutn in SD, SA& BS	651	9.0015	945	8.2337	1083	5.8922	227	371	1080	961	879	6.34286	5.10994	4.99108	5.39988	6.13588
2	Swetha_37873			894	9.0015	1188	7.6769	1170	6.328	470	119	1323	1204	1122	6.34286	5.10994	4.99108	5.39988	6.13588
3	Mishuozhima_02432			753	8.7539	1047	7.6769	1029	6.328	227	371	1182	1063	981	6.34286	5.10994	4.99108	5.39988	6.13588
4	Baizhima_28528			894	8.7539	1188	7.6769	1170	6.328	368	119	1323	1204	1122	6.34286	5.10994	4.99108	5.39988	6.13588
1	Zhongzhi13_30549	Intron/exon gain by gene fusion, Alternative 5' and 3' splice ends	Mutn in SA, BS, Ig-M BRCA1 & SF6	385	7.3422	1004	7.8336	9	7.4257	350	84	738	1300	103	6.34286	5.29333	5.57314	5.08782	5.52722
2	Baizhima_29373			385	7.3422	940	9.0631	9	7.4257	350	84	738	1315	103	6.34286	5.29333	5.57314	5.08782	5.52722
3	Swetha_39149			187	7.3422	806	7.8336	1012	6.2788	152	359	540	1102	107	6.34286	5.19298	5.57314	5.08782	5.52722
4	Swetha_39148			434	7.4651	342	11.8327	1651	6.2788	791	998	1179	1741	372	6.34286	5.19298	5.57314	5.08782	5.77064
1	Zhongzhi13_28437	Intron gain/loss, Exon skipping, Alternative 3'splice ends	Mutn of BS	580	7.6044	1260	10.9962	228	7.4257	230	803	918	449	428	5.46656	5.29333	5.53635	5.02906	5.52722
2	Swetha_36571		New SA, New BS (2) at pos 1131, 1845, mutn of BS	580	7.6044	1308	10.9962	228	7.4257	230	803	918	449	428	5.46656	5.29333	5.53635	5.02906	5.52722
1	Swetha_25903	Gene fusion, Exon skipping, Alternative 5' splice ends	Mutn in SD &SF2	454	10.7666	1124	10.4405	1590	7.4257	873	873	795	1289	859	6.14187	5.69913	5.12648	5.75657	5.30513
2	Swetha_25904			1188	7.3041	644	10.4405	1110	7.4257	393	393	1301	809	379	6.14187	5.69913	5.97924	5.75657	5.30513
1	Swetha_38333	Intron/exon gain by gene fusion, Mutually exclusive exons, Alternative 3' splice ends	Mutn in SA, SF1, IgM-BRCA1, SF5	346	11.4551	1222	9.6467	570	6.7452	176	176	531	1390	746	5.5424	5.09017	5.80722	5.96771	5.77064
2	Yuzhi11_23561			466	11.4551	1315	9.6467	690	6.7452	6	296	651	1483	866	5.73874	5.09017	5.80722	5.96771	5.77064
3	Swetha_38328			466	11.4551	2231	8.3423	690	6.7452	2250	2250	651	2355	866	6.58909	5.40091	5.80722	5.66209	5.77064
1	Swetha_37469	Transposon insertion, gene fusion, alternative 5' and 3' splice ends	Mutn in SD, SA, Bs & all trans factors	881	13.0754	365	7.9415	1464	6.3021	413	413	1461	412	488	5.98497	5.19298	5.44098	6.3244	5.16198
2	Swetha_36198			1149	9.8225	3055	12.0767	968	7.4257	3377	3377	2571	32	1343	5.73874	4.81171	5.85996	5.72198	6.13588
1	Zhongzhi13_04758	Transposon insertion, Intron/Exon gain by gene fusion, Alternative 5' and 3' splice ends	Mutn in SD, SA, BS, SF1, IgM-BRCA1, SF5	88	9.0693	169	12.2638	31	6.5727	1327	1327	630	95	735	5.41508	5.26377	5.17947	6.3244	5.52722
2	Swetha_09150			946	8.4729	331	10.7954	363	7.4934	5	39	693	340	798	5.22033	4.65003	5.17947	6.01235	5.52722
3	Swetha_09155			697	9.0693	778	12.2638	264	7.4934	1019	584	1062	704	1167	5.98497	5.47144	5.17947	6.3244	5.52722
1	Swetha_13727	Transposon insertion, Intron/Exon gain by gene fusion, Exon skipping, Alternative 5' and 3' splice ends	Mutn in SD, SA, BS, SF1, IgM-BRCA1, SF2, SF6	275	9.6758	172	11.0511	850	6.5876	1156	416	210	1251	558	6.34286	5.05584	5.12648	5.08782	5.52722
2	Zhongzhi13_08421			379	8.1012	79	9.4463	523	6.5876	829	89	591	924	231	6.34286	5.05584	4.68174	5.08782	5.52722
3	Swetha_13729			288	4.7341	454	4.179	171	5.5225	253	253	15	348	459	6.34286	5.01964	4.68174	5.08782	3.83191
1	Swetha_24865	Transposon insertion, Intron/Exon gain by gene fusion, Alternative 3' splice ends	Mutn in SA, BS, SF2, SF5 & SF6	892	8.5966	402	9.6147	922	6.8305	449	449	106	925	494	5.78863	5.47144	5.17486	5.75657	4.71335
2	Swetha_24868			1735	8.5966	2407	9.8325	72	7.0835	1292	1292	156	2895	675	5.78863	5.47144	5.46158	6.07868	5.32201
3	Yuzhi11_12196			892	8.5966	402	9.6147	922	6.8305	449	449	106	925	494	5.78863	5.47144	5.17486	5.75657	4.71335
1	Swetha_36105	Transposon insertion, mutually exclusive exons	New BS at 523	880	10.1293	353	7.8741	904	6.5727	1106	209	249	1125	225	4.27907	4.15276	4.85961	5.12507	4.71335
2	Zhongzhi13_28050		New SA at 542	907	10.1293	380	7.8741	931	6.5727	1133	236	276	1152	252	4.27907	4.15276	4.85961	5.12507	4.71335
1	Zhongzhi13_29637	Transposon insertion, Intron/Exon gain by gene fusion, Alternative 5' splice ends	New SD at 2592	47	7.1292	168	6.5714	21	8.0156	1322	1102	456	944	426	5.46656	5.10994	5.29103	6.07868	4.91856
2	Swetha_37939			2592	9.1094	168	6.5714	21	8.0156	1322	1102	456	944	426	5.46656	5.10994	5.29103	6.07868	4.91856
1	Swetha_16173	Transposon insertion, Alternative 3' splice end	New SA at 484, mutn in BS at 523	254	7.0936	198	8.8222	1713	7.0835	980	980	1015	120	803	6.14187	5.69913	5.12648	5.75657	5.52722
2	Swetha_16175			254	7.0936	198	8.8222	1626	7.0835	893	893	928	120	716	6.14187	5.69913	5.12648	5.75657	5.52722
1	Zhongzhi13_31089	Transposon insertion, Alternative 5' and 3' splice end	Mutn in SD, SA & SF2	1886	10.3018	1886	9.603	2099	7.4257	2128	1673	687	454	174	5.63173	4.96965	4.89264	6.07868	5.52722
2	Swetha_39685			445	8.3243	509	9.0517	1418	7.4257	1447	1367	1182	454	174	5.63173	4.96965	4.65407	6.07868	5.52722
1	Swetha_06379	Transposon insertion, Alternative 5' splice end	Mutn in SD, SF2, SF5, SF6	328	7.8958	214	8.0474	212	7.3351	180	180	1314	377	1161	5.89564	5.31787	5.85996	5.76662	5.52722
2	Swetha_23040			509	7.7988	349	8.0474	347	7.3351	315	315	1102	1104	1071	5.89564	5.31787	4.72529	5.65565	5.32201
1	Baizhima_16315	Transposon insertion, Alternative 3' splice end	Mutn in SA, BS, SF1, IgM-BRCA1, SF5	1040	11.1861	269	8.7474	410	7.1551	1276	1271	1472	278	1552	5.01178	4.72087	5.3348	5.65565	6.13588
2	Mishuozhima_16023			1604	11.1861	850	8.6304	240	7.4934	219	219	2036	495	2116	5.98962	4.79195	5.3348	5.96771	6.13588
1	Swetha_04277	Transposon insertion, Exon skipping, Alternative 5' and 3' splice end		1094	7.0438	1556	8.9305	33	7.0835	1307	1307	963	1306	557	6.58909	5.40091	4.45089	6.01878	4.55332
2	Zhongzhi13_10532			1094	7.0438	1517	8.9305	33	7.0835	1268	1268	963	1267	557	6.58909	5.40091	4.45089	6.01878	4.55332
3	Swetha_16214		Mutn in SD, SA , BS	1223	8.9305	869	6.7213	116	5.9977	1082	1082	738	1081	332	6.58909	5.40091	4.45089	6.01878	4.55332
4	Baizhima_17686		Mutn SF6	1154	7.0438	1616	8.9305	33	7.0835	1367	1367	1023	1366	499	6.58909	5.40091	4.45089	6.01878	4.91856
1	Swetha_00918	Intron/Exon gain by gene fusion, Alternative 3' and 5' splice ends	Mutn in SD, SA, Bs & all trans factors	41	6.3391	170	10.3038	120	5.9959	83	83	117	435	545	4.63818	4.55948	4.89264	6.01235	3.27394
2	Swetha_19579			678	5.2574	131	12.075	28	6.5727	272	272	901	701	753	5.3855	4.58402	5.10072	5.76662	4.58418
1	Baizhima_06483	Transposon insertion, alternative exon ends,Alternative 5' splice end	New SD at 428 (Zh), Mutn in IgM-BRCA1, SF2	211	9.9065	958	7.6531	907	5.7931	934	934	402	868	810	5.98962	4.79195	5.04798	5.27713	5.16198
2	Zhongzhi13_04749			211	9.9065	991	7.6531	940	5.7931	967	967	402	901	843	5.98962	4.79195	5.04798	5.27713	5.16198
3	Swetha_09138			211	9.9065	865	7.6531	814	5.7931	841	841	402	775	717	5.98962	4.79195	5.04798	5.27713	5.16198
1	Swetha_25707	Transposon induced deletion, exon skipping, Alternative 5' splice ends	Mutn in SD, SF1&SF2	409	11.4013	245	10.7362	246	7.4257	653	653	266	652	255	6.58909	5.40091	4.49876	6.01878	4.71335
2	Swetha_41219			125	4.9319	245	10.7362	246	7.4257	431	431	266	430	255	6.58909	5.40091	4.49876	6.01878	4.71335
1	Zhongzhi13_32025	Transposon induced deletion, exon skipping, Alternative 3' splice ends	New SA, BS, Mutn in IgM-BRCA1, SF2, SF5	1262	9.0283	545	7.8099	1500	7.764	416	416	1510	7	1100	5.3855	4.58402	4.87324	5.76662	5.52722
2	Swetha_06026		Mutn in BS,Mutn in IgM-BRCA1, SF2, SF5	1433	9.0283	698	7.8099	1671	7.764	569	569	1681	160	1271	5.3855	4.58402	4.87324	5.76662	5.52722
3	Swetha_40878		New SA, BS, Mutn in IgM-BRCA1, SF2, SF5	947	9.0283	230	7.8099	1185	7.764	101	101	1195	528	785	5.3855	4.58402	4.87324	5.75657	5.52722
1	Zhongzhi13_23851	Exon skipping, Alternative exon ends	Mutn in SF1&SF2	166	8.3825	68	10.1573	483	6.3211	217	240	325	461	171	4.76555	4.40591	4.53503	4.91394	4.71335
2	Swetha_06086			178	8.3825	80	10.1573	495	6.3211	229	252	337	473	183	4.76555	4.40591	4.53503	4.91394	4.71335
1	Zhongzhi13_04978	Alternative exon ends	Mutn in BS, IgM-BRCA1, SF2	141	8.2052	472	4.2853	469	7.764	418	418	183	375	157	5.3855	4.58402	3.86795	6.01235	5.16198
2	Yuzhi11_22771			141	8.2052	473	4.2853	470	7.764	418	418	183	375	157	5.3855	4.58402	3.86795	6.01235	5.16198
1	Zhongzhi13_20062	Gene fusion, Alternative exon ends, Alternative 3' splice end	Mutn in SA, SF1, IgM-BRCA1, SF2, SF6	252	6.1842	10	7.2299	462	7.764	226	226	24	321	63	6.34286	5.01964	3.93334	5.44452	5.77064
2	Swetha_04251			297	6.1842	89	6.0085	25	7.764	271	271	69	366	108	6.34286	5.01964	3.93334	5.44452	4.93989
1	Zhongzhi13_14642	Transposon induced deletion, Intron/exon gain, alternative exon ends, Alternative 3'splice end	Mutn in SA, New SA (Sw), Mutn in BS& all trans factors	236	8.7898	372	6.7328	99	6.3021	382	382	450	531	33	4.25952	4.51294	3.87423	5.27713	6.13588
2	Swetha_20696			125	8.7898	277; 389	9.6445; 9.5197	395	6.8305	710	710	717	398	127	4.61622	4.38046	4.63023	6.3244	4.34811
1	Baizhima_07573	Transposon induced gene fusion, Intron/exon gain, Alternative 3' and 5' splice ends	Mutn in SA, SD & all trans factors	695	5.7893	600	6.9143	326	8.0156	674	764	559	251	828	4.61622	4.70413	4.72529	5.17615	4.91856
2	Swetha_09527			614	5.7893	519	6.9143	245	8.0156	593	683	478	170	747	4.61622	4.70413	4.72529	5.17615	4.91856
3	Swetha_09533			1025	8.7419	650	11.8621	245	8.0156	1758	1758	1286	1582	2154	6.23585	5.17321	5.19771	6.07868	5.52722
1	Baizhima_25943	Transposon induced deletion, Intron/exon gain, alternative exon ends, Alternative 5'splice end	Mutn in SD, BS, SF1, IgM-BRCA1, SF2	839	6.2788	1025	7.9305	310	6.336	716	716	75	40	261	4.61622	4.38046	5.29103	5.77306	4.91856
2	Yuzhi11_17788			839	6.2788	269; 1025	7.0301; 6.7613	310	6.336	716	716	75	40	261	4.61622	4.38046	5.29103	5.77306	4.91856
3	Swetha_34424			794	6.2788	1031	7.9305	108	6.0654	671	671	63	28	249	4.61622	4.38046	5.29103	5.77306	4.91856
1	Zhongzhi13_18013	Transposon induced deletion, Intron/exon gain, Exon skipping, alternative exon ends, Alternative 5'splice end	Mutn in SD, BS, SF1, IgM-BRCA1, SF2	376	7.9531	886; 801	8.1468; 8.1712	111	6.7379	113	55	873	579	817	5.22033	4.65003	5.00421	5.65565	5.52722
2	Swetha_24419			376	7.9531	892; 807	8.1468; 8.1712	93	6.7379	95	37	879	585	823	5.22033	4.65003	5.00421	5.65565	5.52722
1	Zhongzhi13_30289	Transposon insertion, alternative exon ends, Alternative 5' splice end	Mutn in SD, BS, SF1, SF2& SF6	661	8.5436	835	5.3443	121	6.8564	248	248	288	564	140	4.19096	4.8577	5.41007	5.65565	4.34811
2	Swetha_06684			676	8.0607	850	5.3443	31	5.6555	251	251	291	579	324	4.19096	4.8577	5.41007	5.65565	4.71335
						mRNA
	Mishuozhima			Intron				Ex-1	Ex-2	Ex-3	Ex-4	Ex-5	Ex-6	Ex-7	Ex-8	Ex-9	Ex-10	Ex-11	Ex-12	Int-1	Int-2	Int-3	Int-4	Int-5	Int-6	Int-7	Int-8	Int-9	Int-10	Int-11
						mRNA
	Swetha			Intron				Ex-1	Ex-2	Ex-3	Ex-4	Ex-5	Ex-6	Ex-7	Ex-8	Ex-9	Ex-10	Ex-11	Ex-12	Ex-13	Ex-14	Ex-15	Ex-16	Ex-17	Ex-18	Int-1	Int-2	Int-3	Int-4	Int-5	Int-6	Int-7	Int-8	Int-9	Int-10	Int-11	Int-12	Int-13	Int-14	Int-15	Int-16	Int-17	Int-18

## Sheet: Transposons
SI-8 The relics of transposons identified in sesame pan-genome among the coding sequences and the transposon class mentioned
GENE	TRANSPOSON	LOCATION	LOCATION	LOCATION	LOCATION	ADDITIONAL TRANSPOSONS DETECTED	LOCATION	UPSTREAM/DOWNSTREAM
Swetha 00824	DH helitron	997-1151
Swetha 10826	DH helitron	100-248
Swetha 17617	DH helitron	517-626				Copia	550-632
Zhongzhi13 17646	helitron	215-296				Copia	133-295
Swetha 11741	DH helitron	87-125
Swetha 02461	DH helitron	1726-1910
Baizhima 12047	DH helitron	366-458
Mishuozhima 03111	DH helitron	366-458
Zhongzhi13 09838	DH helitron	366-458
Baizhima 05820	DH helitron	751-818	614-662	988-1028				US
Swetha 12618	DH helitron	686-743	542-590	952-992
Swetha 12621	DH helitron	686-743	542-590	952-992
Baizhima 16634	DH helitron	991-1046	694-770					DS
Zhongzhi13 15124	DH helitron	694-770
Mishuozhima 16334	DH helitron	847-902	550-609					DS
Swetha 21316	DH helitron	847-902	550-609
Zhongzhi13 10461	DH helitron	838-922
Yuzhi11 07044	DH helitron	346-439	630-729
Swetha 16136	DH helitron	55-148	339-434
Baizhima 18367	DH helitron	607-689						DS
Yuzhi11 11470	NA
Zhongzhi13 17382	DH helitron	607-689
Swetha 23589	NA
Swetha 23592	DH helitron	607-689
Baizhima 08704	DH helitron	787-872	970-1035	904-959	1087-1154			US
Swetha 10977	DH helitron	793-878	976-1041	910-965	1093-1160			DS
Zhongzhi13 06339	DH helitron	787-872	970-1035	904-959	1087-1146

## Sheet: Duplication_events
SI-9 The Duplication events among all the AP2/ERF and WRKY genes identified in sesame pan-genome
GENE	DUPLICATION_TYPE	FAMILY
Zhongzhi13_01108	Dispersed	AP2
Zhongzhi13_01568	Dispersed	AP2
Zhongzhi13_02194	Dispersed	AP2
Zhongzhi13_02429	Dispersed	AP2
Zhongzhi13_02575	Dispersed	AP2
Zhongzhi13_03999	Dispersed	AP2
Zhongzhi13_06339	Dispersed	AP2
Zhongzhi13_06780	Dispersed	AP2
Zhongzhi13_08043	Dispersed	AP2
Zhongzhi13_12680	Dispersed	AP2
Zhongzhi13_13215	Dispersed	AP2
Zhongzhi13_14539	Dispersed	AP2
Zhongzhi13_15273	Dispersed	AP2
Zhongzhi13_17360	Dispersed	AP2
Zhongzhi13_17597	Dispersed	AP2
Zhongzhi13_18380	Dispersed	AP2
Zhongzhi13_18592	Dispersed	AP2
Zhongzhi13_18593	Dispersed	AP2
Zhongzhi13_20134	Dispersed	AP2
Zhongzhi13_21545	Dispersed	AP2
Zhongzhi13_24086	Dispersed	AP2
Zhongzhi13_26066	Dispersed	AP2
Zhongzhi13_26346	Dispersed	AP2
Zhongzhi13_29600	Dispersed	AP2
Zhongzhi13_30167	Dispersed	AP2
Zhongzhi13_31185	Dispersed	AP2
Zhongzhi13_02437	Singleton	AP2
Zhongzhi13_09429	Singleton	AP2
Zhongzhi13_15274	Singleton	AP2
Zhongzhi13_33551	Singleton	AP2
Zhongzhi13_33595	Singleton	AP2
SIN_1005434	WGD or Segmental	AP2
SIN_1010767	WGD or Segmental	AP2
Zhongzhi13_00224	WGD or Segmental	AP2
Zhongzhi13_01115	WGD or Segmental	AP2
Zhongzhi13_01334	WGD or Segmental	AP2
Zhongzhi13_01351	WGD or Segmental	AP2
Zhongzhi13_01569	WGD or Segmental	AP2
Zhongzhi13_01594	WGD or Segmental	AP2
Zhongzhi13_01706	WGD or Segmental	AP2
Zhongzhi13_01790	WGD or Segmental	AP2
Zhongzhi13_01852	WGD or Segmental	AP2
Zhongzhi13_01920	WGD or Segmental	AP2
Zhongzhi13_02427	WGD or Segmental	AP2
Zhongzhi13_02428	WGD or Segmental	AP2
Zhongzhi13_02453	WGD or Segmental	AP2
Zhongzhi13_02701	WGD or Segmental	AP2
Zhongzhi13_02825	WGD or Segmental	AP2
Zhongzhi13_02830	WGD or Segmental	AP2
Zhongzhi13_03050	WGD or Segmental	AP2
Zhongzhi13_03306	WGD or Segmental	AP2
Zhongzhi13_03469	WGD or Segmental	AP2
Zhongzhi13_03834	WGD or Segmental	AP2
Zhongzhi13_04281	WGD or Segmental	AP2
Zhongzhi13_04635	WGD or Segmental	AP2
Zhongzhi13_04636	WGD or Segmental	AP2
Zhongzhi13_04659	WGD or Segmental	AP2
Zhongzhi13_04906	WGD or Segmental	AP2
Zhongzhi13_06212	WGD or Segmental	AP2
Zhongzhi13_06381	WGD or Segmental	AP2
Zhongzhi13_06883	WGD or Segmental	AP2
Zhongzhi13_06890	WGD or Segmental	AP2
Zhongzhi13_06937	WGD or Segmental	AP2
Zhongzhi13_07043	WGD or Segmental	AP2
Zhongzhi13_07468	WGD or Segmental	AP2
Zhongzhi13_07576	WGD or Segmental	AP2
Zhongzhi13_07628	WGD or Segmental	AP2
Zhongzhi13_07931	WGD or Segmental	AP2
Zhongzhi13_08144	WGD or Segmental	AP2
Zhongzhi13_09287	WGD or Segmental	AP2
Zhongzhi13_09430	WGD or Segmental	AP2
Zhongzhi13_09454	WGD or Segmental	AP2
Zhongzhi13_09568	WGD or Segmental	AP2
Zhongzhi13_09569	WGD or Segmental	AP2
Zhongzhi13_09570	WGD or Segmental	AP2
Zhongzhi13_09690	WGD or Segmental	AP2
Zhongzhi13_09719	WGD or Segmental	AP2
Zhongzhi13_09838	WGD or Segmental	AP2
Zhongzhi13_10152	WGD or Segmental	AP2
Zhongzhi13_10370	WGD or Segmental	AP2
Zhongzhi13_10461	WGD or Segmental	AP2
Zhongzhi13_11895	WGD or Segmental	AP2
Zhongzhi13_12070	WGD or Segmental	AP2
Zhongzhi13_12318	WGD or Segmental	AP2
Zhongzhi13_12386	WGD or Segmental	AP2
Zhongzhi13_13505	WGD or Segmental	AP2
Zhongzhi13_14296	WGD or Segmental	AP2
Zhongzhi13_14299	WGD or Segmental	AP2
Zhongzhi13_14301	WGD or Segmental	AP2
Zhongzhi13_14540	WGD or Segmental	AP2
Zhongzhi13_14672	WGD or Segmental	AP2
Zhongzhi13_14877	WGD or Segmental	AP2
Zhongzhi13_15124	WGD or Segmental	AP2
Zhongzhi13_15272	WGD or Segmental	AP2
Zhongzhi13_15539	WGD or Segmental	AP2
Zhongzhi13_16722	WGD or Segmental	AP2
Zhongzhi13_16974	WGD or Segmental	AP2
Zhongzhi13_17382	WGD or Segmental	AP2
Zhongzhi13_17525	WGD or Segmental	AP2
Zhongzhi13_17595	WGD or Segmental	AP2
Zhongzhi13_17596	WGD or Segmental	AP2
Zhongzhi13_17646	WGD or Segmental	AP2
Zhongzhi13_17725	WGD or Segmental	AP2
Zhongzhi13_18090	WGD or Segmental	AP2
Zhongzhi13_18440	WGD or Segmental	AP2
Zhongzhi13_18590	WGD or Segmental	AP2
Zhongzhi13_19932	WGD or Segmental	AP2
Zhongzhi13_20122	WGD or Segmental	AP2
Zhongzhi13_20133	WGD or Segmental	AP2
Zhongzhi13_21210	WGD or Segmental	AP2
Zhongzhi13_21493	WGD or Segmental	AP2
Zhongzhi13_21657	WGD or Segmental	AP2
Zhongzhi13_21859	WGD or Segmental	AP2
Zhongzhi13_22112	WGD or Segmental	AP2
Zhongzhi13_22412	WGD or Segmental	AP2
Zhongzhi13_22498	WGD or Segmental	AP2
Zhongzhi13_23474	WGD or Segmental	AP2
Zhongzhi13_23742	WGD or Segmental	AP2
Zhongzhi13_24026	WGD or Segmental	AP2
Zhongzhi13_24308	WGD or Segmental	AP2
Zhongzhi13_25401	WGD or Segmental	AP2
Zhongzhi13_25868	WGD or Segmental	AP2
Zhongzhi13_26064	WGD or Segmental	AP2
Zhongzhi13_26065	WGD or Segmental	AP2
Zhongzhi13_26640	WGD or Segmental	AP2
Zhongzhi13_26907	WGD or Segmental	AP2
Zhongzhi13_27622	WGD or Segmental	AP2
Zhongzhi13_27806	WGD or Segmental	AP2
Zhongzhi13_28562	WGD or Segmental	AP2
Zhongzhi13_29442	WGD or Segmental	AP2
Zhongzhi13_30136	WGD or Segmental	AP2
Zhongzhi13_30137	WGD or Segmental	AP2
Zhongzhi13_30166	WGD or Segmental	AP2
Zhongzhi13_30427	WGD or Segmental	AP2
Zhongzhi13_31963	WGD or Segmental	AP2
Zhongzhi13_32012	WGD or Segmental	AP2
Zhongzhi13_32014	WGD or Segmental	AP2
Zhongzhi13_32148	WGD or Segmental	AP2
Zhongzhi13_32245	WGD or Segmental	AP2
SIN_1021618	Dispersed	wrky
Zhongzhi13_14768	Dispersed	wrky
Zhongzhi13_24455	Dispersed	wrky
Zhongzhi13_28798	Dispersed	wrky
Zhongzhi13_22905	Singleton	wrky
Zhongzhi13_26827	Singleton	wrky
Zhongzhi13_29190	Singleton	wrky
SIN_1021622	WGD or Segmental	wrky
Zhongzhi13_00117	WGD or Segmental	wrky
Zhongzhi13_00291	WGD or Segmental	wrky
Zhongzhi13_01348	WGD or Segmental	wrky
Zhongzhi13_01901	WGD or Segmental	wrky
Zhongzhi13_02413	WGD or Segmental	wrky
Zhongzhi13_02671	WGD or Segmental	wrky
Zhongzhi13_02714	WGD or Segmental	wrky
Zhongzhi13_03714	WGD or Segmental	wrky
Zhongzhi13_04749	WGD or Segmental	wrky
Zhongzhi13_04758	WGD or Segmental	wrky
Zhongzhi13_04978	WGD or Segmental	wrky
Zhongzhi13_05039	WGD or Segmental	wrky
Zhongzhi13_05263	WGD or Segmental	wrky
Zhongzhi13_06862	WGD or Segmental	wrky
Zhongzhi13_07633	WGD or Segmental	wrky
Zhongzhi13_08421	WGD or Segmental	wrky
Zhongzhi13_08457	WGD or Segmental	wrky
Zhongzhi13_09283	WGD or Segmental	wrky
Zhongzhi13_09335	WGD or Segmental	wrky
Zhongzhi13_09637	WGD or Segmental	wrky
Zhongzhi13_09638	WGD or Segmental	wrky
Zhongzhi13_10493	WGD or Segmental	wrky
Zhongzhi13_10532	WGD or Segmental	wrky
Zhongzhi13_12681	WGD or Segmental	wrky
Zhongzhi13_12988	WGD or Segmental	wrky
Zhongzhi13_13137	WGD or Segmental	wrky
Zhongzhi13_13210	WGD or Segmental	wrky
Zhongzhi13_13433	WGD or Segmental	wrky
Zhongzhi13_14640	WGD or Segmental	wrky
Zhongzhi13_14642	WGD or Segmental	wrky
Zhongzhi13_15309	WGD or Segmental	wrky
Zhongzhi13_15593	WGD or Segmental	wrky
Zhongzhi13_15605	WGD or Segmental	wrky
Zhongzhi13_16955	WGD or Segmental	wrky
Zhongzhi13_17682	WGD or Segmental	wrky
Zhongzhi13_17943	WGD or Segmental	wrky
Zhongzhi13_18013	WGD or Segmental	wrky
Zhongzhi13_18384	WGD or Segmental	wrky
Zhongzhi13_19532	WGD or Segmental	wrky
Zhongzhi13_19696	WGD or Segmental	wrky
Zhongzhi13_20062	WGD or Segmental	wrky
Zhongzhi13_20329	WGD or Segmental	wrky
Zhongzhi13_20690	WGD or Segmental	wrky
Zhongzhi13_23735	WGD or Segmental	wrky
Zhongzhi13_23851	WGD or Segmental	wrky
Zhongzhi13_24031	WGD or Segmental	wrky
Zhongzhi13_24090	WGD or Segmental	wrky
Zhongzhi13_26477	WGD or Segmental	wrky
Zhongzhi13_26627	WGD or Segmental	wrky
Zhongzhi13_26659	WGD or Segmental	wrky
Zhongzhi13_28050	WGD or Segmental	wrky
Zhongzhi13_28134	WGD or Segmental	wrky
Zhongzhi13_28295	WGD or Segmental	wrky
Zhongzhi13_28339	WGD or Segmental	wrky
Zhongzhi13_28437	WGD or Segmental	wrky
Zhongzhi13_29244	WGD or Segmental	wrky
Zhongzhi13_29584	WGD or Segmental	wrky
Zhongzhi13_29637	WGD or Segmental	wrky
Zhongzhi13_29729	WGD or Segmental	wrky
Zhongzhi13_29935	WGD or Segmental	wrky
Zhongzhi13_30232	WGD or Segmental	wrky
Zhongzhi13_30289	WGD or Segmental	wrky
Zhongzhi13_30409	WGD or Segmental	wrky
Zhongzhi13_30549	WGD or Segmental	wrky
Zhongzhi13_31089	WGD or Segmental	wrky
Zhongzhi13_31495	WGD or Segmental	wrky
Zhongzhi13_32025	WGD or Segmental	wrky
Zhongzhi13_32303	WGD or Segmental	wrky
Swetha_00119	Dispersed	AP2
Swetha_00307	Dispersed	AP2
Swetha_02245	Dispersed	AP2
Swetha_02461	Dispersed	AP2
Swetha_02512	Dispersed	AP2
Swetha_03138	Dispersed	AP2
Swetha_03139	Dispersed	AP2
Swetha_03766	Dispersed	AP2
Swetha_03899	Dispersed	AP2
Swetha_03929	Dispersed	AP2
Swetha_04254	Dispersed	AP2
Swetha_04859	Dispersed	AP2
Swetha_04991	Dispersed	AP2
Swetha_05854	Dispersed	AP2
Swetha_05899	Dispersed	AP2
Swetha_07074	Dispersed	AP2
Swetha_10977	Dispersed	AP2
Swetha_11540	Dispersed	AP2
Swetha_11545	Dispersed	AP2
Swetha_11676	Dispersed	AP2
Swetha_12621	Dispersed	AP2
Swetha_16020	Dispersed	AP2
Swetha_18222	Dispersed	AP2
Swetha_19667	Dispersed	AP2
Swetha_20273	Dispersed	AP2
Swetha_20410	Dispersed	AP2
Swetha_23592	Dispersed	AP2
Swetha_25096	Dispersed	AP2
Swetha_25097	Dispersed	AP2
Swetha_25102	Dispersed	AP2
Swetha_25103	Dispersed	AP2
Swetha_26389	Dispersed	AP2
Swetha_28477	Dispersed	AP2
Swetha_28866	Dispersed	AP2
Swetha_29014	Dispersed	AP2
Swetha_31547	Dispersed	AP2
Swetha_33069	Dispersed	AP2
Swetha_38593	Dispersed	AP2
Swetha_38629	Dispersed	AP2
Swetha_38630	Dispersed	AP2
Swetha_39151	Dispersed	AP2
Swetha_41771	Dispersed	AP2
Swetha_00306	WGD or Segmental	AP2
Swetha_00824	WGD or Segmental	AP2
Swetha_01481	WGD or Segmental	AP2
Swetha_02066	WGD or Segmental	AP2
Swetha_02076	WGD or Segmental	AP2
Swetha_02342	WGD or Segmental	AP2
Swetha_02415	WGD or Segmental	AP2
Swetha_02835	WGD or Segmental	AP2
Swetha_03136	WGD or Segmental	AP2
Swetha_03175	WGD or Segmental	AP2
Swetha_03517	WGD or Segmental	AP2
Swetha_04095	WGD or Segmental	AP2
Swetha_04100	WGD or Segmental	AP2
Swetha_04806	WGD or Segmental	AP2
Swetha_04990	WGD or Segmental	AP2
Swetha_05085	WGD or Segmental	AP2
Swetha_05110	WGD or Segmental	AP2
Swetha_05159	WGD or Segmental	AP2
Swetha_05853	WGD or Segmental	AP2
Swetha_05855	WGD or Segmental	AP2
Swetha_05910	WGD or Segmental	AP2
Swetha_06472	WGD or Segmental	AP2
Swetha_06775	WGD or Segmental	AP2
Swetha_07072	WGD or Segmental	AP2
Swetha_07942	WGD or Segmental	AP2
Swetha_08528	WGD or Segmental	AP2
Swetha_08985	WGD or Segmental	AP2
Swetha_08993	WGD or Segmental	AP2
Swetha_08994	WGD or Segmental	AP2
Swetha_09024	WGD or Segmental	AP2
Swetha_09366	WGD or Segmental	AP2
Swetha_09370	WGD or Segmental	AP2
Swetha_10826	WGD or Segmental	AP2
Swetha_11674	WGD or Segmental	AP2
Swetha_11741	WGD or Segmental	AP2
Swetha_11899	WGD or Segmental	AP2
Swetha_12618	WGD or Segmental	AP2
Swetha_12700	WGD or Segmental	AP2
Swetha_13076	WGD or Segmental	AP2
Swetha_13359	WGD or Segmental	AP2
Swetha_14615	WGD or Segmental	AP2
Swetha_14844	WGD or Segmental	AP2
Swetha_15001	WGD or Segmental	AP2
Swetha_15194	WGD or Segmental	AP2
Swetha_15360	WGD or Segmental	AP2
Swetha_15741	WGD or Segmental	AP2
Swetha_16019	WGD or Segmental	AP2
Swetha_16136	WGD or Segmental	AP2
Swetha_17617	WGD or Segmental	AP2
Swetha_17848	WGD or Segmental	AP2
Swetha_18147	WGD or Segmental	AP2
Swetha_18219	WGD or Segmental	AP2
Swetha_19431	WGD or Segmental	AP2
Swetha_19664	WGD or Segmental	AP2
Swetha_20270	WGD or Segmental	AP2
Swetha_20272	WGD or Segmental	AP2
Swetha_20276	WGD or Segmental	AP2
Swetha_20564	WGD or Segmental	AP2
Swetha_20975	WGD or Segmental	AP2
Swetha_21316	WGD or Segmental	AP2
Swetha_21486	WGD or Segmental	AP2
Swetha_21844	WGD or Segmental	AP2
Swetha_22735	WGD or Segmental	AP2
Swetha_22765	WGD or Segmental	AP2
Swetha_23066	WGD or Segmental	AP2
Swetha_23589	WGD or Segmental	AP2
Swetha_23786	WGD or Segmental	AP2
Swetha_23877	WGD or Segmental	AP2
Swetha_23881	WGD or Segmental	AP2
Swetha_23957	WGD or Segmental	AP2
Swetha_24055	WGD or Segmental	AP2
Swetha_24518	WGD or Segmental	AP2
Swetha_24927	WGD or Segmental	AP2
Swetha_25094	WGD or Segmental	AP2
Swetha_26388	WGD or Segmental	AP2
Swetha_26615	WGD or Segmental	AP2
Swetha_26629	WGD or Segmental	AP2
Swetha_28226	WGD or Segmental	AP2
Swetha_28399	WGD or Segmental	AP2
Swetha_28474	WGD or Segmental	AP2
Swetha_28613	WGD or Segmental	AP2
Swetha_28864	WGD or Segmental	AP2
Swetha_29177	WGD or Segmental	AP2
Swetha_29550	WGD or Segmental	AP2
Swetha_30858	WGD or Segmental	AP2
Swetha_30866	WGD or Segmental	AP2
Swetha_31543	WGD or Segmental	AP2
Swetha_31874	WGD or Segmental	AP2
Swetha_33068	WGD or Segmental	AP2
Swetha_33643	WGD or Segmental	AP2
Swetha_33901	WGD or Segmental	AP2
Swetha_33902	WGD or Segmental	AP2
Swetha_34339	WGD or Segmental	AP2
Swetha_34631	WGD or Segmental	AP2
Swetha_35823	WGD or Segmental	AP2
Swetha_36738	WGD or Segmental	AP2
Swetha_38592	WGD or Segmental	AP2
Swetha_38628	WGD or Segmental	AP2
Swetha_39000	WGD or Segmental	AP2
Swetha_40799	WGD or Segmental	AP2
Swetha_40862	WGD or Segmental	AP2
Swetha_41017	WGD or Segmental	AP2
Swetha_41134	WGD or Segmental	AP2
Swetha_04251	Dispersed	wrky
Swetha_05796	Dispersed	wrky
Swetha_12712	Dispersed	wrky
Swetha_13729	Dispersed	wrky
Swetha_16175	Dispersed	wrky
Swetha_19583	Dispersed	wrky
Swetha_20852	Dispersed	wrky
Swetha_21917	Dispersed	wrky
Swetha_24868	Dispersed	wrky
Swetha_25707	Dispersed	wrky
Swetha_25904	Dispersed	wrky
Swetha_26113	Dispersed	wrky
Swetha_26866	Dispersed	wrky
Swetha_28528	Dispersed	wrky
Swetha_36198	Dispersed	wrky
Swetha_37006	Dispersed	wrky
Swetha_39149	Dispersed	wrky
Swetha_00675	WGD or Segmental	wrky
Swetha_00744	WGD or Segmental	wrky
Swetha_00918	WGD or Segmental	wrky
Swetha_02485	WGD or Segmental	wrky
Swetha_03115	WGD or Segmental	wrky
Swetha_03474	WGD or Segmental	wrky
Swetha_03532	WGD or Segmental	wrky
Swetha_04277	WGD or Segmental	wrky
Swetha_06026	WGD or Segmental	wrky
Swetha_06086	WGD or Segmental	wrky
Swetha_06379	WGD or Segmental	wrky
Swetha_06502	WGD or Segmental	wrky
Swetha_06527	WGD or Segmental	wrky
Swetha_06684	WGD or Segmental	wrky
Swetha_09138	WGD or Segmental	wrky
Swetha_09150	WGD or Segmental	wrky
Swetha_09155	WGD or Segmental	wrky
Swetha_09460	WGD or Segmental	wrky
Swetha_09527	WGD or Segmental	wrky
Swetha_09533	WGD or Segmental	wrky
Swetha_09830	WGD or Segmental	wrky
Swetha_11646	WGD or Segmental	wrky
Swetha_12711	WGD or Segmental	wrky
Swetha_13727	WGD or Segmental	wrky
Swetha_13781	WGD or Segmental	wrky
Swetha_14611	WGD or Segmental	wrky
Swetha_14675	WGD or Segmental	wrky
Swetha_15080	WGD or Segmental	wrky
Swetha_15083	WGD or Segmental	wrky
Swetha_16173	WGD or Segmental	wrky
Swetha_16214	WGD or Segmental	wrky
Swetha_18596	WGD or Segmental	wrky
Swetha_19182	WGD or Segmental	wrky
Swetha_19273	WGD or Segmental	wrky
Swetha_19579	WGD or Segmental	wrky
Swetha_20694	WGD or Segmental	wrky
Swetha_20696	WGD or Segmental	wrky
Swetha_20700	WGD or Segmental	wrky
Swetha_20702	WGD or Segmental	wrky
Swetha_21534	WGD or Segmental	wrky
Swetha_21913	WGD or Segmental	wrky
Swetha_23040	WGD or Segmental	wrky
Swetha_23996	WGD or Segmental	wrky
Swetha_24326	WGD or Segmental	wrky
Swetha_24419	WGD or Segmental	wrky
Swetha_24472	WGD or Segmental	wrky
Swetha_24865	WGD or Segmental	wrky
Swetha_25903	WGD or Segmental	wrky
Swetha_26111	WGD or Segmental	wrky
Swetha_26862	WGD or Segmental	wrky
Swetha_27391	WGD or Segmental	wrky
Swetha_31194	WGD or Segmental	wrky
Swetha_31558	WGD or Segmental	wrky
Swetha_34424	WGD or Segmental	wrky
Swetha_34609	WGD or Segmental	wrky
Swetha_34662	WGD or Segmental	wrky
Swetha_36105	WGD or Segmental	wrky
Swetha_36571	WGD or Segmental	wrky
Swetha_37469	WGD or Segmental	wrky
Swetha_37873	WGD or Segmental	wrky
Swetha_37939	WGD or Segmental	wrky
Swetha_38042	WGD or Segmental	wrky
Swetha_38328	WGD or Segmental	wrky
Swetha_38333	WGD or Segmental	wrky
Swetha_38725	WGD or Segmental	wrky
Swetha_38738	WGD or Segmental	wrky
Swetha_38977	WGD or Segmental	wrky
Swetha_39148	WGD or Segmental	wrky
Swetha_39685	WGD or Segmental	wrky
Swetha_40212	WGD or Segmental	wrky
Swetha_40878	WGD or Segmental	wrky
Swetha_41219	WGD or Segmental	wrky

## Sheet: Ka_Ks_AP2ERF
SI-10 The Ka/Ks analysis of AP2/ERF duplicates in sesame pan-genome. The evolutionary time period im Million Years Ago is mentioned. The classification details and intron numbers are also given.
Seq_1	Seq_2	Ka	Ks	Ka_Ks	Seq1_Class	Seq2_Class	Introns	Introns	MYA
Mishuozhima_16334	Swetha_21316	0	0.014797	0	AP2	AP2	7	8	0.493234
Swetha_41771	Zhongzhi13_33595	0	0.0189884	0	AP2	AP2	6	6	0.632945
Swetha_28474	Swetha_28477	2.01982	3.47574	0.581121	ERF-B6	ERF-B6	0	36	115.858
Swetha_20410	Swetha_23066	0.0461442	0.078453	0.588177	RAV	RAV	0	1	2.6151
Yuzhi11_08258	Zhongzhi13_12386	2.49592	4.22508	0.590739	AP2	AP2	9	12	140.836
Mishuozhima_11521	Swetha_39151	0.0284799	0.0468171	0.608324	ERF-B3	ERF-B3	1	0	1.56057
Swetha_25096	Swetha_25102	0.04152	0.066415	0.62516	ERF-B3	ERF-B3	0	1	2.21383
Baizhima_02301	Zhongzhi13_02437	0.114657	0.178982	0.640606	ERF-B3	ERF-B3	1	1	5.96608
Baizhima_11945	Swetha_15194	0.0185738	0.0256923	0.722931	DREB-A2	DREB-A3	2	0	0.856411
Swetha_11540	Swetha_11545	3.16949	4.30001	0.737089	ERF-B4	ERF-B4	4	1	143.334
Swetha_01481	Zhongzhi13_01115	0.183772	0.241851	0.759855	DREB-A4	DREB-A4	1	0	8.0617
Swetha_20975	Zhongzhi13_14877	1.19987	1.57859	0.760094	ERF-B5	ERF-B5	0	0	52.6195
Mishuozhima_12028	Zhongzhi13_10152	0.920868	1.14705	0.802817	DREB-A4	DREB-A4	1	2	38.2349
Swetha_08994	Swetha_08985	0.0414359	0.0494191	0.83846	ERF-B6	ERF-B6	0	0	1.6473
Swetha_18219	Baizhima_14285	1.94269	2.31348	0.839725	AP2	AP2	7	9	77.1161
Swetha_03929	Yuzhi11_12060	1.75624	2.08781	0.841189	ERF	ERF	0	0	69.5936
Baizhima_03468	Swetha_08994	0.191756	0.221698	0.864944	ERF-B6	ERF-B6	0	0	7.38993
Swetha_20564	Baizhima_16099	0.343114	0.366843	0.935316	DREB-A4	DREB-A4	1	0	12.2281
Zhongzhi13_02194	Swetha_02835	0.828142	0.884321	0.936473	AP2	AP2	4	20	29.4774
Yuzhi11_01813	Zhongzhi13_03050	0.0952972	0.0997068	0.955774	DREB-A4	DREB-A4	2	1	3.32356
Baizhima_11811	Mishuozhima_11521	0.325202	0.3377	0.962991	ERF-B3	ERF-B3	2	1	11.2567
Yuzhi11_22408	Swetha_26615	0.950177	0.986565	0.963116	ERF-B4	ERF-B4	1	1	32.8855
Swetha_38593	Zhongzhi13_30137	0.619034	0.636151	0.973092	ERF-B1	DREB-A4	0	1	21.205
Swetha_41017	Zhongzhi13_32148	0.959156	0.977728	0.981005	AP2	AP2	8	6	32.5909
Swetha_10977	Zhongzhi13_06339	0.836171	0.837849	0.997998	AP2	AP2	7	8	27.9283
Zhongzhi13_10461	Yuzhi11_07044	3.43606	3.36348	1.02158	AP2	AP2	8	16	112.116
Zhongzhi13_12318	Swetha_18147	0.181197	0.177081	1.02324	DREB-A4	DREB-A4	0	5	5.90271
Baizhima_11675	Yuzhi11_06305	0.248447	0.240806	1.03173	DREB-A4	ERF-B1	0	1	8.02687
Zhongzhi13_06212	Swetha_10826	0.795735	0.770182	1.03318	DREB-A4	DREB-A4	0	1	25.6727
Swetha_05899	Yuzhi11_19341	0.832156	0.799685	1.0406	DREB-A4	DREB-A4	0	0	26.6562
Baizhima_01854	Mishuozhima_01646	0.0541065	0.0517447	1.04564	ERF-B6	ERF-B6	1	5	1.72482
Swetha_23877	Baizhima_18558	0.870807	0.831231	1.04761	ERF-B3	ERF-B3	1	0	27.7077
Baizhima_06882	Swetha_29014	2.56332	2.42775	1.05584	AP2	AP2	4	7	80.9249
Baizhima_08704	Swetha_10977	0.856786	0.810513	1.05709	AP2	AP2	7	7	27.0171
Zhongzhi13_33551	Baizhima_31489	0.719625	0.672503	1.07007	AP2	AP2	7	7	22.4168
Baizhima_11916	Mishuozhima_11633	2.95605	2.70488	1.09286	DREB-A2	DREB-A2	5	0	90.1627
Yuzhi11_09353	Zhongzhi13_14301	0.374328	0.338656	1.10533	ERF-B3	ERF-B3	1	0	11.2885
Baizhima_09780	Swetha_12618	1.25256	1.1331	1.10542	AP2	AP2	5	7	37.7701
Baizhima_18345	Zhongzhi13_17360	0.141793	0.123916	1.14426	DREB-A2	DREB-A2	0	0	4.13055
Baizhima_16736	Swetha_21486	2.75162	2.38909	1.15174	ERF-B3	ERF-B3	0	1	79.6365
Yuzhi11_07044	Swetha_16136	2.74463	2.26548	1.2115	AP2	AP2	16	9	75.5159
Baizhima_16634	Zhongzhi13_15124	0.384711	0.315452	1.21955	AP2	AP2	10	10	10.5151
Swetha_23589	Swetha_23592	2.41852	1.97188	1.22651	AP2	AP2	2	5	65.7294
Baizhima_10330	Mishuozhima_01934	0.309824	0.251062	1.23405	AP2	AP2	6	5	8.36874
Swetha_23592	Zhongzhi13_17382	0.557627	0.447869	1.24507	AP2	AP2	5	6	14.929
Baizhima_05006	Yuzhi11_01813	0.0572184	0.0447449	1.27877	DREB-A6	DREB-A6	0	2	1.4915
Zhongzhi13_14301	Swetha_20276	0.222211	0.173716	1.27916	ERF-B3	ERF-B3	0	0	5.79055
Baizhima_16737	Swetha_04859	2.88167	2.20199	1.30867	ERF-B3	ERF-B3	1	1	73.3996
Baizhima_18635	Swetha_24055	2.59522	1.96531	1.32051	DREB-A2	DREB-A2	0	0	65.5104
Swetha_25097	Swetha_25103	0.124163	0.0924786	1.34261	ERF-B3	ERF-B3	0	2	3.08262
Baizhima_14217	Zhongzhi13_12318	0.134796	0.0997562	1.35125	DREB-A4	DREB-A4	0	0	3.32521
Swetha_02461	Swetha_11674	3.02035	2.18287	1.38366	ERF-B6	ERF-B6	11	1	72.7623
Swetha_09366	Swetha_09370	0.354877	0.250687	1.41562	ERF-B1	ERF-B1	0	1	8.35624
Zhongzhi13_02437	Yuzhi11_01236	1.95673	1.35195	1.44734	ERF-B3	ERF-B3	1	0	45.0649
Swetha_03766	Yuzhi11_02483	0.0801884	0.0543353	1.47581	AP2	AP2	7	7	1.81118
Swetha_17617	Zhongzhi13_11895	2.09599	1.39447	1.50308	DREB-A5	DREB-A4	2	0	46.4823
Baizhima_01209	Zhongzhi13_01108	0.103975	0.067788	1.53383	DREB-A1	DREB-A1	0	0	2.2596
Baizhima_30706	Swetha_41017	3.2209	2.09177	1.5398	AP2	AP2	6	8	69.7256
Baizhima_01396	Yuzhi11_22967	1.31361	0.84623	1.5523	ERF-B5	ERF-B5	0	1	28.2077
Baizhima_15884	Swetha_20270	2.48328	1.5626	1.5892	DREB-A4	DREB-A4	2	0	52.0866
Swetha_11674	Swetha_11676	2.44349	1.46891	1.66347	ERF-B6	ERF-B6	1	11	48.9636
Zhongzhi13_30427	Yuzhi11_13872	2.14213	1.15111	1.86093	AP2	AP2	6	6	38.3703
Swetha_11741	Baizhima_09246	0.106382	0.05546	1.91818	ERF-B6	ERF-B6	2	1	1.84867
Swetha_16019	Swetha_16020	3.12724	1.50507	2.07781	AP2	AP2	8	8	50.1689
Zhongzhi13_17360	Yuzhi11_11449	2.44653	1.16274	2.10411	DREB-A2	DREB-A2	0	0	38.758
Zhongzhi13_12680	Yuzhi11_19862	1.52502	0.69241	2.20248	ERF-B1	ERF-B1	0	1	23.0803
Baizhima_15884	Baizhima_07127	3.87561	1.44107	2.68941	DREB-B2	DREB-A4	3	0	48.0355
Baizhima_12047	Swetha_15360	2.83574	1.00053	2.83425	ERF-B3	ERF-B3	2	1	33.3509
Zhongzhi13_06937	Yuzhi11_04663	0.0536051	0.0142438	3.76341	ERF-B6	ERF-B6	1	2	0.474792
Mishuozhima_01646	SIN_1010767	5.69563	1.47441	3.86298	ERF-B6	ERF-B6	5	1	49.1471

[truncated: 8 more sheets: Ka_Ks_WRKY, meme_localization_AP2ERF, meme_localization_WRKY, Cis_elements_AP2ERF, Cis_elements_WRKY, String_Interaction, Gene_exprn, Data Sheets]
